# Supplementary material for: Impact of animal strain on gene expression in a rat model of acute cardiac rejection
Source: PubMed Central journal article supplement (PMC2711118; doi:10.1186/1471-2164-10-280), 2009-06-24
Supplement: 1471-2164-10-280-S1.pdf [file 1471-2164-10-280-S1.pdf]

**Additional File 1. Heart Tissue: Alterations in Gene Expression due to Strain Effect and Rejection Effect (color coded based on Venn diagram, Figure 3A)**

| Probe Set ID               | Gene Title                                                                                | Gene Symbol      | Entrez Gene ID | Fold Change   |                  | False Discovery Rate |                      | Average Present Call |           |           |          |      |
|----------------------------|-------------------------------------------------------------------------------------------|------------------|----------------|---------------|------------------|----------------------|----------------------|----------------------|-----------|-----------|----------|------|
|                            |                                                                                           |                  |                | Strain Effect | Rejection Effect | Native BN / DA       | Allograft / Isograft | Native BN            | Native DA | Allograft | Isograft |      |
| <b>A. Strain Effect</b>    |                                                                                           |                  |                |               |                  |                      |                      |                      |           |           |          |      |
| 1387011_at                 | lipocalin 2                                                                               | Lcn2             | 170496         | 7.44          | 4.62             | 1.0E-01              | 7.9E-03              | 0.60                 | 0.00      | 0.40      | 0.00     | 0.00 |
| 1388018_at                 | selectin, endothelial cell                                                                | Sele             | 25544          | 6.77          | 1.51             | 9.1E-02              | 1.9E-01              | 0.50                 | 0.00      | 0.80      | 0.13     | 0.80 |
| 1369928_at                 | actin, alpha 1, skeletal muscle                                                           | Acta1            | 29437          | 5.45          | 0.69             | 2.0E-03              | 3.0E-01              | 1.00                 | 1.00      | 1.00      | 1.00     | 1.00 |
| 1389673_at                 | Transcribed locus                                                                         |                  |                | 5.12          | 0.48             | 1.2E-02              | 7.6E-03              | 1.00                 | 1.00      | 0.80      | 1.00     | 1.00 |
| 1369152_at                 | protein phosphatase 3, regulatory subunit B, alpha isoform (calcineurin B, type I)        | Ppp3r1           | 29748          | 4.20          | 0.63             | 2.3E-02              | 2.0E-01              | 1.00                 | 0.00      | 0.00      | 0.00     | 0.00 |
| 1372060_at                 |                                                                                           |                  |                | 4.00          | 1.48             | 5.0E-03              | 3.5E-01              | 1.00                 | 0.00      | 0.40      | 0.00     | 0.00 |
| 1389185_at                 | Adenylyate kinase 1                                                                       | Ak1              | 24183          | 3.70          | 0.43             | 3.3E-03              | 1.7E-03              | 1.00                 | 1.00      | 1.00      | 1.00     | 1.00 |
| 1389234_at                 | von Willebrand factor                                                                     | Vwf              | 116669         | 3.51          | 0.94             | 3.8E-02              | 7.8E-01              | 1.00                 | 1.00      | 1.00      | 1.00     | 1.00 |
| 1368128_at                 | phospholipase A2, group IIA (platelets, synovial fluid)                                   | Pla2g2a          | 29692          | 3.16          | 2.25             | 4.9E-02              | 1.1E-01              | 1.00                 | 1.00      | 1.00      | 0.63     | 1.00 |
| 1368681_at                 | insulin-like growth factor binding protein 3                                              | Igfbbp3          | 24484          | 3.07          | 1.56             | 3.3E-03              | 1.7E-01              | 1.00                 | 1.00      | 1.00      | 1.00     | 1.00 |
| 1368042_a_at               | high mobility group box 1                                                                 | Hmgb1            | 25459          | 0.31          | 0.84             | 4.8E-02              | 4.8E-02              | 1.00                 | 1.00      | 1.00      | 1.00     | 1.00 |
| 1372577_at                 | actin related protein 2/3 complex, subunit 4 (predicted)                                  | Arpe4_predicted  | 297518         | 0.30          | 1.43             | 4.8E-02              | 3.3E-02              | 1.00                 | 1.00      | 1.00      | 1.00     | 1.00 |
| 1369716_s_at               | lectin, galactose binding, soluble 5                                                      | Lgals5           | 25475          | 0.30          | 0.67             | 5.3E-02              | 2.0E-01              | 0.00                 | 1.00      | 1.00      | 1.00     | 1.00 |
| 1374429_at                 | Transcribed locus                                                                         |                  |                | 0.30          | 0.78             | 3.7E-02              | 1.9E-01              | 1.00                 | 1.00      | 1.00      | 1.00     | 1.00 |
| 1386922_at                 | carbonic anhydrase 2                                                                      | Ca2              | 54231          | 0.29          | 0.96             | 2.3E-02              | 8.2E-01              | 1.00                 | 1.00      | 1.00      | 1.00     | 1.00 |
| 1375343_at                 | Transcribed locus                                                                         |                  |                | 0.29          | 0.45             | 1.2E-02              | 8.6E-03              | 1.00                 | 1.00      | 1.00      | 1.00     | 1.00 |
| 1370886_a_at               | kinesin 2                                                                                 | Kns2             | 171041         | 0.28          | 0.59             | 3.3E-03              | 8.6E-02              | 1.00                 | 1.00      | 1.00      | 1.00     | 1.00 |
| 1382778_at                 | Dual specificity phosphatase 6                                                            | Dusp6            | 116663         | 0.24          | 1.93             | 7.1E-02              | 1.5E-02              | 0.00                 | 0.88      | 1.00      | 1.00     | 1.00 |
| 1377114_at                 |                                                                                           |                  |                | 0.24          | 0.57             | 3.1E-03              | 7.2E-02              | 1.00                 | 1.00      | 1.00      | 1.00     | 1.00 |
| 1375519_at                 | globin, alpha                                                                             | LOC287167        | 287167         | 0.24          | 0.83             | 5.9E-02              | 7.1E-01              | 1.00                 | 1.00      | 1.00      | 1.00     | 1.00 |
| <b>B. Rejection Effect</b> |                                                                                           |                  |                |               |                  |                      |                      |                      |           |           |          |      |
| 1368266_at                 | arginase 1                                                                                | Arg1             | 29221          | 1.10          | 84.50            | 9.5E-01              | 1.7E-05              | 0.20                 | 0.00      | 1.00      | 0.00     | 0.00 |
| 1368521_at                 | napsin A aspartic peptidase                                                               | Napsa            | 365668         | 1.96          | 78.18            | 2.2E-01              | 4.4E-05              | 0.00                 | 0.00      | 1.00      | 0.00     | 0.00 |
| 1370493_a_at               | leukocyte immunoglobulin-like receptor, subfamily B (with TM and ITIM domains), member 3  | Lilrb3           | 361493         | 4.65          | 54.39            | 3.9E-02              | 1.1E-03              | 0.20                 | 0.00      | 1.00      | 0.00     | 0.00 |
| 1369191_at                 | interleukin 6                                                                             | Il6              | 24498          | 1.54          | 41.53            | 6.8E-01              | 1.9E-03              | 0.00                 | 0.00      | 1.00      | 0.00     | 0.00 |
| 1375917_at                 | glycoprotein 49b                                                                          | Gp49b            | 292594         | 1.19          | 33.73            | 9.0E-01              | 2.9E-03              | 0.00                 | 0.00      | 1.00      | 0.25     | 0.00 |
| 1369877_at                 | CD8 antigen, alpha chain                                                                  | Cd8a             | 24930          | 0.96          | 32.01            | 9.8E-01              | 9.8E-04              | 0.00                 | 0.00      | 1.00      | 0.00     | 0.00 |
| 1373525_at                 | Fc fragment of IgG, low affinity IIIa, receptor                                           | Fcgr3a           | 304966         | 1.33          | 31.88            | 2.2E-01              | 1.3E-04              | 0.00                 | 0.00      | 1.00      | 0.00     | 0.00 |
| 1387902_a_at               | similar to IG KAPPA CHAIN N-V REGION K2 PRECURSOR                                         | LOC590180        | 500180         | 1.01          | 26.98            | 9.9E-01              | 2.0E-04              | 0.00                 | 0.00      | 1.00      | 0.00     | 0.00 |
| 1369290_at                 | chemokine (C-C motif) receptor 5                                                          | Ccr5             | 117029         | 1.22          | 26.71            | 8.7E-01              | 1.3E-03              | 0.00                 | 0.00      | 1.00      | 0.00     | 0.00 |
| 1368519_at                 | serine (or cysteine) peptidase inhibitor, clade E, member 1                               | Serpine1         | 24617          | 1.27          | 26.62            | 7.4E-01              | 1.1E-03              | 0.00                 | 0.00      | 1.00      | 0.25     | 0.00 |
| 1370628_at                 | granzyme B                                                                                | Gzmb             | 171528         | 1.16          | 25.43            | 9.0E-01              | 5.1E-03              | 0.00                 | 0.00      | 1.00      | 0.00     | 0.00 |
| 1388046_at                 | integrin alpha M                                                                          | Itgam            | 25021          | 0.91          | 23.20            | 8.2E-01              | 4.4E-05              | 0.00                 | 0.00      | 1.00      | 0.00     | 0.00 |
| 1371079_at                 | Fc receptor, IgG, low affinity IIb                                                        | Fcgr2b           | 289211         | 1.49          | 21.15            | 8.2E-01              | 1.3E-04              | 0.00                 | 0.00      | 1.00      | 1.00     | 1.00 |
| 1387472_at                 | CD3 antigen delta polypeptide                                                             | Cd3d             | 25710          | 1.12          | 21.15            | 9.4E-01              | 7.5E-04              | 0.00                 | 0.00      | 1.00      | 0.00     | 0.00 |
| 1387835_at                 | interleukin 1 receptor antagonist                                                         | Il1rn            | 60582          | 1.06          | 20.57            | 8.9E-01              | 6.8E-03              | 0.00                 | 0.00      | 1.00      | 0.60     | 0.00 |
| 1376062_at                 | syndecan 1                                                                                | Sdc1             | 25216          | 1.50          | 20.33            | 6.5E-01              | 1.9E-03              | 0.00                 | 0.00      | 1.00      | 0.00     | 0.00 |
| 1367581_a_at               | secreted phosphoprotein 1                                                                 | Spp1             | 25353          | 1.18          | 19.21            | 7.0E-01              | 6.2E-04              | 0.00                 | 0.00      | 1.00      | 1.00     | 1.00 |
| 1368965_at                 | solute carrier family 16 (monocarboxylic acid transporters), member 3                     | Slc16a3          | 80878          | 1.41          | 19.20            | 6.2E-01              | 1.3E-04              | 0.00                 | 0.00      | 1.00      | 0.00     | 0.00 |
| 1372989_at                 | hypothetical LOC308081                                                                    | LOC308081        | 308081         | 1.02          | 17.60            | 9.7E-01              | 2.5E-04              | 0.00                 | 0.00      | 1.00      | 0.90     | 0.00 |
| 1390797_at                 | lymphocyte cytosolic protein 2                                                            | Lcp2             | 155918         | 1.43          | 16.85            | 3.5E-01              | 2.5E-03              | 0.00                 | 0.00      | 1.00      | 0.00     | 0.00 |
| 1370902_at                 | aldo-keto reductase family 1, member B8                                                   | Akr1b8           | 286921         | 1.63          | 16.22            | 2.8E-01              | 2.8E-04              | 0.40                 | 0.00      | 1.00      | 0.25     | 0.00 |
| 1387160_at                 | potassium voltage-gated channel, Isk-related subfamily, member 3                          | Kcnc3            | 63883          | 0.78          | 15.78            | 9.1E-01              | 1.5E-04              | 0.00                 | 0.00      | 1.00      | 0.80     | 0.00 |
| 1398275_at                 | matrix metalloproteinase 9                                                                | Mmp9             | 81687          | 1.24          | 15.60            | 7.8E-01              | 1.4E-04              | 0.00                 | 0.00      | 1.00      | 0.80     | 0.00 |
| 1370613_s_at               | UDP glycosyltransferase 1 family, polypeptide A1                                          | Ugt1a1           | 113992         | 1.11          | 15.38            | 9.3E-01              | 7.8E-04              | 0.00                 | 0.00      | 1.00      | 0.00     | 0.00 |
| 1370080_at                 | heme oxygenase (decycling) 1                                                              | Hmox1            | 24451          | 1.29          | 14.78            | 4.9E-01              | 1.9E-04              | 1.00                 | 1.00      | 1.00      | 1.00     | 1.00 |
| 1370090_at                 | lymphocyte cytosolic protein 2                                                            | Lcp2             | 155918         | 1.38          | 14.59            | 7.7E-01              | 1.5E-04              | 0.00                 | 0.00      | 1.00      | 0.25     | 0.00 |
| 1383500_at                 | ribosome binding protein 1 homolog 180kDa (dog) (predicted)                               | Rrbp1_predicted  | 311483         | 0.91          | 13.91            | 9.6E-01              | 1.4E-03              | 0.00                 | 0.00      | 1.00      | 0.60     | 0.00 |
| 1374779_at                 | Coagulation factor XIII, A1 subunit                                                       | F13a1            | 60327          | 1.40          | 13.71            | 2.8E-01              | 6.4E-05              | 1.00                 | 0.63      | 1.00      | 1.00     | 1.00 |
| 1370904_at                 | major histocompatibility complex, class II, DM alpha                                      | Hla-dma          | 294274         | 1.32          | 12.67            | 5.8E-01              | 1.3E-04              | 1.00                 | 0.38      | 1.00      | 1.00     | 1.00 |
| 1371913_at                 | transforming growth factor, beta induced                                                  | Tgfb1            | 116487         | 1.01          | 12.42            | 9.9E-01              | 1.1E-04              | 1.00                 | 1.00      | 1.00      | 1.00     | 1.00 |
| 1387017_at                 | squalene epoxidase                                                                        | Sqle             | 29230          | 1.03          | 12.33            | 9.4E-01              | 2.2E-03              | 0.00                 | 0.00      | 1.00      | 0.00     | 0.00 |
| 1370885_at                 | cathepsin Z                                                                               | Ctsz             | 252929         | 1.14          | 12.13            | 6.8E-01              | 3.6E-04              | 1.00                 | 1.00      | 1.00      | 1.00     | 1.00 |
| 1368930_at                 | potassium intermediate/small conductance calcium-activated channel, subfamily N, member 4 | Kcnn4            | 65506          | 0.55          | 12.01            | 4.9E-01              | 4.1E-04              | 0.00                 | 0.00      | 1.00      | 0.00     | 0.00 |
| 1368134_a_at               | interleukin 4 receptor, alpha                                                             | Il4ra            | 25084          | 2.57          | 11.97            | 4.9E-01              | 6.5E-03              | 0.00                 | 0.00      | 1.00      | 0.00     | 0.00 |
| 1388436_at                 | small nuclear ribonucleoprotein polypeptide A                                             | Snrpa            | 292729         | 1.24          | 11.95            | 8.6E-01              | 4.8E-04              | 0.00                 | 0.00      | 1.00      | 0.00     | 0.00 |
| 1369964_at                 | coronin, actin binding protein 1A                                                         | Coro1a           | 155151         | 1.73          | 11.63            | 1.0E-01              | 2.0E-04              | 0.00                 | 0.00      | 1.00      | 0.13     | 0.00 |
| 1387396_at                 | hepcidin antimicrobial peptide                                                            | Hamp             | 84604          | 1.01          | 11.55            | 9.9E-01              | 3.5E-04              | 1.00                 | 1.00      | 1.00      | 1.00     | 1.00 |
| 1371209_at                 | RT1 class I, CE5                                                                          | RT1-CE5          | 309607         | 1.92          | 11.50            | 1.4E-01              | 2.0E-04              | 1.00                 | 0.75      | 1.00      | 1.00     | 1.00 |
| 1377698_at                 | tumor necrosis factor receptor superfamily, member 5                                      | Tnfrsf5          | 171369         | 0.92          | 11.47            | 8.9E-01              | 2.4E-03              | 0.00                 | 0.00      | 1.00      | 0.80     | 0.00 |
| 1370483_at                 | similar to transmembrane NK cell receptor 2B4                                             | LOC679046        | 679046         | 0.90          | 11.34            | 9.0E-01              | 1.4E-03              | 0.80                 | 0.75      | 1.00      | 0.63     | 1.00 |
| 1373889_at                 | similar to Cd300D antigen                                                                 | LOC498022        | 498022         | 1.06          | 11.34            | 9.1E-01              | 3.7E-04              | 1.00                 | 1.00      | 1.00      | 1.00     | 1.00 |
| 1371447_at                 | placenta-specific 8 (predicted)                                                           | Plac8_predicted  | 360914         | 2.89          | 11.33            | 1.5E-01              | 4.3E-04              | 1.00                 | 0.88      | 1.00      | 1.00     | 1.00 |
| 1377163_at                 | inhibin beta-B                                                                            | Inhb             | 25196          | 1.43          | 11.25            | 8.6E-01              | 4.7E-04              | 0.10                 | 0.00      | 1.00      | 0.00     | 0.00 |
| 1367705_at                 | glutaredoxin 1 (thioltransferase)                                                         | Glxr1            | 64045          | 0.71          | 11.24            | 2.0E-01              | 2.2E-04              | 1.00                 | 1.00      | 1.00      | 1.00     | 1.00 |
| 1376100_at                 | tubulin, beta 6                                                                           | Tubb6            | 307351         | 1.05          | 11.18            | 9.5E-01              | 1.9E-04              | 0.20                 | 0.00      | 1.00      | 1.00     | 1.00 |
| 1370964_at                 | argininosuccinate synthetase                                                              | Ass              | 25698          | 1.48          | 11.15            | 5.5E-01              | 1.4E-04              | 0.20                 | 0.00      | 1.00      | 0.00     | 0.00 |
| 1369294_at                 | bone marrow stromal cell antigen 1                                                        | Bst1             | 81506          | 1.09          | 11.11            | 8.8E-01              | 2.8E-03              | 0.00                 | 0.00      | 1.00      | 0.00     | 0.00 |
| 1374730_at                 | Thioredoxin reductase 3 (predicted)                                                       | Txnrd3_predicted | 297437         | 1.12          | 11.10            | 6.5E-01              | 2.3E-04              | 1.00                 | 1.00      | 1.00      | 1.00     | 1.00 |
| 1374775_at                 | antigen identified by monoclonal antibody Ki-67 (predicted)                               | Mki67_predicted  | 291234         | 2.06          | 11.09            | 4.7E-01              | 1.1E-02              | 0.00                 | 0.00      | 1.00      | 0.50     | 0.00 |
| 1373932_at                 | Transcribed locus                                                                         |                  |                | 3.21          | 10.89            | 2.5E-01              | 7.2E-04              | 1.00                 | 0.25      | 1.00      | 1.00     | 1.00 |
| 1369665_a_at               | interleukin 18                                                                            | Il18             | 29197          | 1.41          | 10.78            | 4.9E-01              | 8.5E-05              | 0.00                 | 0.00      | 1.00      | 0.63     | 0.00 |
| 1386998_at                 | aldolase C                                                                                | Aldoc            | 24191          | 1.18          | 10.49            | 7.9E-01              | 2.7E-04              | 0.00                 | 0.00      | 1.00      | 0.60     | 0.00 |

| Probe Set ID | Gene Title                                                                               | Gene Symbol          | Fold Change   |                  | False Discovery Rate |                      | Average Present Call |           |           |          |
|--------------|------------------------------------------------------------------------------------------|----------------------|---------------|------------------|----------------------|----------------------|----------------------|-----------|-----------|----------|
|              |                                                                                          |                      | Strain Effect | Rejection Effect | Native BN / DA       | Allograft / Isograft | Native BN            | Native DA | Allograft | Isograft |
| 1386052_at   | Transcribed locus                                                                        |                      | 0.82          | 10.48            | 7.8E-01              | 3.2E-03              | 0.00                 | 0.00      | 1.00      | 0.00     |
| 1368674_at   | liver glycogen phosphorylase                                                             | Pygl                 | 64035         | 1.73             | 10.39                | 7.0E-01              | 3.7E-04              | 0.00      | 0.00      | 1.00     |
| 1368530_at   | matrix metalloproteinase 12                                                              | Mmp12                | 117033        | 0.92             | 10.35                | 9.1E-01              | 6.9E-04              | 0.00      | 0.00      | 1.00     |
| 1370869_at   | branched chain aminotransferase 1, cytosolic                                             | Bcat1                | 29592         | 1.59             | 10.35                | 6.1E-01              | 6.4E-04              | 0.00      | 0.00      | 1.00     |
| 1388596_at   | coactosin-like 1 (Dictyostelium) (predicted)                                             | Cot1l_predicted      | 361422        | 1.11             | 10.29                | 7.8E-01              | 1.9E-04              | 0.40      | 0.00      | 1.00     |
| 1368518_at   | CD53 antigen                                                                             | Cd53                 | 24251         | 1.24             | 10.15                | 4.2E-01              | 4.8E-04              | 1.00      | 1.00      | 1.00     |
| 1387675_at   | Cystatin 10 (chondrocytes) (predicted)                                                   | Cst10_predicted      | 366219        | 0.52             | 10.08                | 4.8E-01              | 1.1E-04              | 0.00      | 0.00      | 1.00     |
| 1368482_at   | B-cell leukemia/lymphoma 2 related protein A1                                            | Bcl2l1               | 170929        | 1.13             | 9.99                 | 7.2E-01              | 5.2E-04              | 0.00      | 0.00      | 1.00     |
| 1370382_at   | RT1 class II, locus Bb                                                                   | RT1-Bb               | 309622        | 1.08             | 9.98                 | 9.7E-01              | 1.3E-03              | 0.00      | 0.00      | 1.00     |
| 1368490_at   | CD14 antigen                                                                             | Cd14                 | 60350         | 1.29             | 9.75                 | 5.3E-01              | 2.0E-04              | 0.80      | 0.50      | 1.00     |
| 1370371_a_at | CEA-related cell adhesion molecule 1                                                     | Ceacam1              | 287009        | 2.66             | 9.67                 | 4.1E-01              | 6.7E-03              | 0.00      | 0.00      | 0.70     |
| 1392794_at   | Transcribed locus                                                                        |                      | 2.08          | 9.54             | 3.6E-01              | 1.1E-04              | 0.00                 | 0.00      | 1.00      |          |
| 1398287_at   | plasminogen activator, urokinase                                                         | Plau                 | 25619         | 0.65             | 9.53                 | 5.2E-01              | 6.2E-03              | 0.00      | 0.00      | 1.00     |
| 1368541_at   | embigin                                                                                  | Emb                  | 114511        | 0.73             | 9.48                 | 4.6E-01              | 1.5E-04              | 0.20      | 0.25      | 1.00     |
| 1368735_a_at | transient receptor potential cation channel, subfamily V, member 2                       | Trpv2                | 29465         | 1.16             | 9.44                 | 9.1E-01              | 3.1E-03              | 0.00      | 0.00      | 1.00     |
| 1372886_at   | transforming, acidic coiled-coil containing protein 3                                    | Tacc3                | 360962        | 0.38             | 9.38                 | 5.2E-01              | 2.8E-03              | 0.00      | 0.00      | 1.00     |
| 1387125_at   | S100 calcium binding protein A9 (calgranulin B)                                          | S100a9               | 94195         | 1.67             | 9.38                 | 6.6E-01              | 5.4E-03              | 1.00      | 1.00      | 1.00     |
| 1393280_at   | lymphocyte antigen 86 (predicted)                                                        | Ly86_predicted       | 291359        | 0.99             | 9.36                 | 9.9E-01              | 3.2E-03              | 0.00      | 0.00      | 1.00     |
| 1388255_x_at | RT1 class I, CEs                                                                         | RT1-CE5              | 309607        | 2.72             | 9.36                 | 2.0E-01              | 8.2E-04              | 1.00      | 1.00      | 1.00     |
| 1387134_at   | schlafen 3                                                                               | Sln3                 | 114247        | 1.27             | 9.25                 | 4.7E-01              | 1.3E-04              | 0.00      | 0.00      | 1.00     |
| 1371146_at   | transcription factor EC                                                                  | Tfec                 | 26296         | 0.97             | 9.19                 | 9.8E-01              | 2.7E-03              | 0.00      | 0.00      | 0.60     |
| 1376390_at   | membrane-spanning 4-domains, subfamily A, member 11 (predicted)                          | Ms4a11_predicted     | 361735        | 0.97             | 9.09                 | 9.5E-01              | 5.3E-04              | 0.40      | 0.13      | 1.00     |
| 1370083_at   | chemokine (C-C motif) receptor 1                                                         | Ccr1                 | 57301         | 0.76             | 9.07                 | 8.7E-01              | 6.4E-04              | 0.00      | 0.00      | 1.00     |
| 1374200_at   | solute carrier family 29 (nucleoside transporters), member 3                             | Slc29a3              | 353307        | 1.33             | 8.95                 | 7.4E-01              | 1.1E-02              | 0.00      | 0.00      | 1.00     |
| 1373722_at   | kinesin family member 20A (predicted)                                                    | Kif20a_predicted     | 361308        | 0.20             | 8.94                 | 6.3E-02              | 2.3E-02              | 0.00      | 0.00      | 0.60     |
| 1367849_at   | syndecan 1                                                                               | Sdc1                 | 25216         | 1.07             | 8.93                 | 8.7E-01              | 4.4E-04              | 0.40      | 0.75      | 1.00     |
| 1370682_at   | leukocyte immunoglobulin-like receptor, subfamily B (with TM and ITIM domains), member 3 | Lilrb3               | 361493        | 1.70             | 8.89                 | 3.1E-01              | 1.4E-04              | 1.00      | 0.63      | 1.00     |
| 1370422_at   | receptor-interacting serine-threonine kinase 3                                           | Ripk3                | 246240        | 0.85             | 8.87                 | 8.0E-01              | 2.0E-04              | 0.20      | 0.00      | 1.00     |
| 1386908_at   | glutaredoxin 1 (thioltransferase)                                                        | Glxr1                | 64045         | 0.31             | 8.86                 | 1.9E-01              | 1.1E-04              | 0.50      | 1.00      | 1.00     |
| 1390383_at   | adipose differentiation related protein                                                  | Adfp                 | 298199        | 1.18             | 8.86                 | 2.1E-01              | 9.8E-05              | 1.00      | 1.00      | 1.00     |
| 1387715_at   | extracellular peptidase inhibitor                                                        | Expi                 | 171059        | 0.56             | 8.85                 | 4.9E-01              | 2.2E-03              | 0.00      | 0.00      | 0.60     |
| 1392731_at   | tumor necrosis factor receptor superfamily, member 1b                                    | Tnfrsf1b             | 156767        | 1.25             | 8.81                 | 8.6E-01              | 3.7E-04              | 0.00      | 0.00      | 0.70     |
| 1373025_at   | complement component 1, q subcomponent, gamma polypeptide                                | C1aq                 | 362634        | 1.41             | 8.78                 | 4.4E-01              | 1.6E-04              | 1.00      | 1.00      | 1.00     |
| 1368760_at   | chemokine (C-X-C motif) ligand 2                                                         | Cxcl2                | 114105        | 1.35             | 8.71                 | 8.0E-01              | 1.0E-02              | 0.00      | 0.00      | 0.90     |
| 1390195_at   | pleckstrin and Sec7 domain containing 4                                                  | Psd4                 | 311785        | 0.54             | 8.65                 | 5.5E-01              | 1.6E-03              | 0.00      | 0.00      | 0.90     |
| 1370119_at   | leucocyte specific transcript 1                                                          | Lst1                 | 64569         | 1.04             | 8.64                 | 9.8E-01              | 3.2E-03              | 0.00      | 0.00      | 1.00     |
| 1368280_at   | cathepsin C                                                                              | Ctsc                 | 25423         | 1.36             | 8.62                 | 2.4E-01              | 1.6E-03              | 1.00      | 1.00      | 1.00     |
| 1385047_x_at | Complement component 6                                                                   | C6                   | 24237         | 1.42             | 8.55                 | 6.4E-01              | 2.3E-04              | 0.00      | 0.00      | 1.00     |
| 1387799_at   | FXRD domain-containing ion transport regulator 2                                         | Fxyd2                | 29639         | 1.92             | 8.52                 | 1.6E-01              | 3.0E-04              | 1.00      | 0.75      | 1.00     |
| 1368558_s_at | allograft inflammatory factor 1                                                          | Aif1                 | 29427         | 1.04             | 8.45                 | 9.4E-01              | 1.8E-04              | 0.60      | 0.50      | 1.00     |
| 1386938_at   | alanyl (membrane) aminopeptidase                                                         | Anpep                | 81641         | 1.09             | 8.44                 | 8.8E-01              | 1.6E-04              | 1.00      | 0.75      | 1.00     |
| 1370882_at   | major histocompatibility complex, class II, DM beta                                      | Hla-dmb              | 294273        | 1.26             | 8.41                 | 4.3E-01              | 1.1E-04              | 1.00      | 1.00      | 1.00     |
| 1370383_s_at | RT1 class II, locus Db1                                                                  | RT1-Db1              | 294270        | 1.11             | 8.39                 | 8.5E-01              | 3.7E-04              | 1.00      | 1.00      | 1.00     |
| 1389210_at   | lymphocyte cytosolic protein 1                                                           | Lcp1                 | 306071        | 1.36             | 8.34                 | 2.3E-01              | 1.1E-04              | 1.00      | 1.00      | 1.00     |
| 1369029_at   | phospholipid scramblase 1                                                                | Plaer1               | 117540        | 1.76             | 8.18                 | 5.9E-01              | 1.4E-04              | 0.80      | 0.25      | 1.00     |
| 1388340_at   | Protocadherin beta 21 (predicted)                                                        | Pcdhb21_predicted    | 24189         | 1.78             | 8.15                 | 6.6E-01              | 1.4E-04              | 0.80      | 0.50      | 1.00     |
| 1398540_at   | regulator of G-protein signaling 1                                                       | Rgs1                 | 54289         | 0.47             | 8.13                 | 5.9E-01              | 7.1E-03              | 0.00      | 0.00      | 1.00     |
| 1375010_at   | CD68 antigen                                                                             | Cd68                 | 287435        | 0.95             | 8.12                 | 9.5E-01              | 4.9E-04              | 0.00      | 0.00      | 1.00     |
| 1398390_at   | similar to Small inducible cytokine B13 precursor                                        | L0C498335            | 498335        | 1.10             | 8.12                 | 9.0E-01              | 1.2E-03              | 0.60      | 0.75      | 1.00     |
| 1372665_at   | phosphoserine aminotransferase 1                                                         | Psat1                | 293820        | 1.10             | 8.03                 | 9.7E-01              | 1.5E-02              | 0.00      | 0.00      | 1.00     |
| 1376296_at   | Phosphatidylinositol 3-kinase, regulatory subunit, polypeptide 1                         | Pik3r1               | 25513         | 0.64             | 7.97                 | 5.7E-01              | 3.0E-02              | 0.00      | 0.00      | 0.90     |
| 1398449_at   | Protein tyrosine phosphatase, non-receptor type 7                                        | Ptpn7                | 246781        | 0.88             | 7.96                 | 9.2E-01              | 3.2E-04              | 0.00      | 0.00      | 1.00     |
| 1372321_at   | lymphoblastic leukemia derived sequence 1                                                | Ly11                 | 304663        | 1.00             | 7.92                 | 1.0E+00              | 2.5E-03              | 0.00      | 0.00      | 0.50     |
| 1369166_at   | matrix metalloproteinase 9                                                               | Mmp9                 | 81687         | 0.47             | 7.90                 | 4.7E-01              | 7.8E-03              | 0.00      | 0.00      | 0.50     |
| 1377034_at   | serine (or cysteine) proteinase inhibitor, clade B, member 1a                            | Serpinh1a            | 291091        | 1.66             | 7.89                 | 1.8E-01              | 6.3E-05              | 0.00      | 0.00      | 1.00     |
| 1368332_at   | guanylate nucleotide binding protein 2                                                   | Gbp2                 | 171164        | 1.35             | 7.88                 | 5.1E-01              | 3.3E-04              | 1.00      | 1.00      | 1.00     |
| 1374469_at   | Similar to C20orf118 (predicted)                                                         | RGD1561343_predicted | 502689        | 1.40             | 7.84                 | 7.7E-01              | 2.9E-03              | 0.10      | 0.80      | 1.00     |
| 1367998_at   | secretory leukocyte peptidase inhibitor                                                  | Slepi                | 296356        | 1.03             | 7.82                 | 9.6E-01              | 2.2E-04              | 0.80      | 0.00      | 1.00     |
| 1390141_at   | methylenetetrahydrofolate dehydrogenase (NADP+ dependent) 1-like (predicted)             | Mthfd1l_predicted    | 361472        | 1.55             | 7.74                 | 8.1E-01              | 5.7E-03              | 0.00      | 0.00      | 1.00     |
| 1368693_at   | Gardner-Rasheed feline sarcoma viral (Fgr) oncogene homolog                              | Fgr                  | 79113         | 1.41             | 7.74                 | 2.4E-01              | 1.5E-04              | 0.60      | 0.00      | 1.00     |
| 1370987_at   | sialophorin                                                                              | Spn                  | 24796         | 2.36             | 7.62                 | 4.8E-01              | 2.8E-03              | 0.10      | 0.00      | 1.00     |
| 1371210_s_at | RT1 class II, locus Aw2                                                                  | RT1-Aw2              | 24737         | 3.69             | 7.59                 | 2.0E-01              | 4.0E-03              | 0.80      | 0.00      | 0.38     |
| 1368487_at   | serine (or cysteine) proteinase inhibitor, clade B, member 2                             | Serpinh2             | 60325         | 0.97             | 7.56                 | 9.9E-01              | 8.3E-03              | 0.00      | 0.00      | 0.80     |
| 1388809_at   | sphingomyelin phosphodiesterase, acid-like 3A                                            | Smpd3a               | 294422        | 0.85             | 7.54                 | 5.3E-01              | 1.4E-03              | 1.00      | 1.00      | 1.00     |
| 1388673_at   | BCL2-like 12 (proline rich) (predicted)                                                  | Bcl2l12_predicted    | 361567        | 1.58             | 7.45                 | 5.7E-01              | 4.9E-04              | 0.00      | 0.00      | 0.50     |
| 1370400_at   | Cullin 2 (predicted)                                                                     | Cul2_predicted       | 361258        | 1.15             | 7.37                 | 9.5E-01              | 4.5E-03              | 0.00      | 0.00      | 1.00     |
| 1398256_at   | interleukin 1 beta                                                                       | Il1b                 | 24494         | 0.90             | 7.36                 | 9.3E-01              | 1.7E-04              | 0.40      | 0.25      | 1.00     |
| 1368006_at   | lysosomal-associated protein transmembrane 5                                             | Laptm5               | 89783         | 1.28             | 7.36                 | 4.7E-01              | 1.7E-04              | 1.00      | 1.00      | 1.00     |
| 1388740_at   | similar to cDNA sequence BC032204 (predicted)                                            | RGD1310168_predicted | 399186        | 1.14             | 7.35                 | 9.5E-01              | 4.5E-04              | 0.00      | 0.00      | 1.00     |
| 1388924_at   | angiotensin-like 4                                                                       | Angptl4              | 362850        | 0.74             | 7.33                 | 7.5E-01              | 3.7E-04              | 0.10      | 0.00      | 1.00     |
| 1371360_at   | N-nuc downstream regulated gene 1                                                        | Ndrg1                | 299923        | 1.10             | 7.32                 | 8.2E-01              | 2.0E-04              | 1.00      | 0.88      | 1.00     |
| 1371239_s_at | tropomyosin 3, gamma                                                                     | Tpm3                 | 117557        | 1.11             | 7.31                 | 7.4E-01              | 8.6E-04              | 1.00      | 1.00      | 1.00     |
| 1390687_at   | pleckstrin                                                                               | Plek                 | 364206        | 1.66             | 7.30                 | 6.2E-01              | 5.4E-04              | 0.00      | 0.00      | 1.00     |
| 1376327_at   | tumor necrosis factor receptor superfamily, member 14 (herpesvirus entry mediator)       | Tnfrsf14             | 366518        | 1.65             | 7.30                 | 6.0E-01              | 5.1E-03              | 0.00      | 0.00      | 1.00     |
| 1398246_s_at | Fc receptor, IgG, low affinity III                                                       | Fcgr3                | 116591        | 1.10             | 7.30                 | 6.8E-01              | 1.4E-03              | 1.00      | 1.00      | 1.00     |
| 1377064_at   | dual specificity phosphatase 6                                                           | Dusp6                | 116663        | 0.98             | 7.29                 | 9.7E-01              | 2.9E-04              | 1.00      | 0.50      | 1.00     |
| 1376255_at   | mitogen activated protein kinase kinase kinase 1 (predicted)                             | Map4k1_predicted     | 292763        | 1.07             | 7.27                 | 9.6E-01              | 5.0E-03              | 0.00      | 0.00      | 1.00     |

| Probe Set ID | Gene Title                                                                               | Gene Symbol          | Fold Change   |                  | False Discovery Rate |                     | Average Present Call |           |           |         |      |
|--------------|------------------------------------------------------------------------------------------|----------------------|---------------|------------------|----------------------|---------------------|----------------------|-----------|-----------|---------|------|
|              |                                                                                          |                      | Strain Effect | Rejection Effect | Native BN / DA       | Allograft / Isoraft | Native BN            | Native DA | Allograft | Isoraft |      |
| 1387568_at   | paired-Ig-like receptor B                                                                | Pirb                 | 65146         | 1.05             | 7.21                 | 9.7E-01             | 7.1E-04              | 0.00      | 0.00      | 1.00    | 0.25 |
| 1367786_at   | proteasome (prosome, macropain) subunit, beta type 8                                     | Psmh8                | 24968         | 1.34             | 7.18                 | 3.5E-01             | 6.9E-04              | 1.00      | 1.00      | 1.00    | 1.00 |
| 1374976_a_at | Sterol O-acyltransferase 1                                                               | Soat1                | 81782         | 1.27             | 7.14                 | 5.9E-01             | 1.0E-03              | 0.30      | 0.38      | 1.00    | 1.00 |
| 1369427_at   | macrophage expressed gene 1                                                              | Mpeg1                | 64552         | 1.45             | 7.13                 | 8.4E-01             | 1.2E-02              | 0.00      | 0.00      | 1.00    | 0.00 |
| 1378140_at   | ADP-ribosylation factor-like 11                                                          | Ar11                 | 364396        | 1.04             | 7.10                 | 9.4E-01             | 4.3E-04              | 1.00      | 1.00      | 1.00    | 1.00 |
| 1369499_at   | thymidylate synthase                                                                     | Tyms                 | 29261         | 0.75             | 7.08                 | 8.7E-01             | 3.0E-03              | 0.00      | 0.00      | 0.80    | 0.00 |
| 1389696_at   | Transcribed locus                                                                        |                      |               | 2.11             | 7.05                 | 5.0E-01             | 6.4E-04              | 0.00      | 0.00      | 1.00    | 0.25 |
| 1371033_at   | RT1 class II, locus Bb                                                                   | RT1-Bb               | 309622        | 0.92             | 7.02                 | 8.4E-01             | 2.2E-04              | 1.00      | 1.00      | 1.00    | 1.00 |
| 1391505_x_at | Transcribed locus                                                                        |                      |               | 0.76             | 6.93                 | 6.7E-01             | 4.9E-04              | 0.20      | 0.75      | 1.00    | 1.00 |
| 1370463_x_at | RT1 class I, CEI6                                                                        | RT1-CEI6             | 414819        | 2.61             | 6.90                 | 2.2E-01             | 2.4E-03              | 1.00      | 0.00      | 1.00    | 0.75 |
| 1388054_a_at | chondroitin sulfate proteoglycan 2                                                       | Cspg2                | 114122        | 1.86             | 6.81                 | 5.9E-01             | 2.7E-03              | 0.00      | 0.25      | 1.00    | 0.75 |
| 1388940_at   | similar to Rho-GTPase-activating protein 25 (predicted)                                  | RGD1562105_predicted | 500246        | 0.28             | 6.81                 | 1.3E-01             | 3.8E-03              | 0.00      | 0.00      | 1.00    | 0.00 |
| 1376652_at   | complement component 1, q subcomponent, alpha polypeptide                                | C1qa                 | 298566        | 1.19             | 6.80                 | 5.7E-01             | 1.5E-04              | 1.00      | 1.00      | 1.00    | 1.00 |
| 1370215_at   | complement component 1, q subcomponent, beta polypeptide                                 | C1qb                 | 29687         | 1.40             | 6.78                 | 4.4E-01             | 1.5E-04              | 1.00      | 1.00      | 1.00    | 1.00 |
| 1374794_at   | kinesin family member 15                                                                 | Kif15                | 353302        | 0.65             | 6.77                 | 6.4E-01             | 1.0E-02              | 0.00      | 0.00      | 1.00    | 0.00 |
| 1372685_at   | cyclin-dependent kinase inhibitor 3 (predicted)                                          | Cdkn3_predicted      | 289993        | 0.31             | 6.76                 | 3.9E-01             | 9.6E-04              | 0.00      | 0.00      | 1.00    | 0.25 |
| 1373544_at   | chemokine (C-X-C motif) ligand 9                                                         | Cxcl9                | 246759        | 1.27             | 6.76                 | 5.0E-01             | 1.1E-03              | 1.00      | 1.00      | 1.00    | 1.00 |
| 1386494_at   | S100 calcium binding protein A8 (calgranulin A)                                          | S100a8               | 116547        | 1.11             | 6.71                 | 9.4E-01             | 9.5E-03              | 0.70      | 0.50      | 1.00    | 0.50 |
| 1379497_at   | Transcribed locus                                                                        |                      |               | 0.85             | 6.69                 | 4.5E-01             | 4.5E-04              | 0.10      | 0.25      | 1.00    | 0.88 |
| 1367942_at   | acid phosphatase 5, tartrate resistant                                                   | Acp5                 | 25732         | 1.16             | 6.67                 | 8.3E-01             | 7.9E-04              | 0.00      | 0.00      | 1.00    | 0.63 |
| 1369953_a_at | CD24 antigen                                                                             | Cd24                 | 25145         | 1.89             | 6.67                 | 4.9E-01             | 9.1E-03              | 0.30      | 0.00      | 0.80    | 0.00 |
| 1389408_at   | ribonucleotide reductase M2 (mapped)                                                     | Rrm2                 | 362720        | 0.89             | 6.65                 | 9.2E-01             | 4.7E-04              | 0.30      | 0.00      | 1.00    | 0.50 |
| 1387831_at   | Inhibitor of Bruton agammaglobulinemia tyrosine kinase (predicted)                       | Ibtk_predicted       | 315858        | 0.64             | 6.58                 | 5.2E-01             | 1.9E-02              | 0.00      | 0.00      | 0.60    | 0.00 |
| 1367850_at   | Fc receptor, IgG, low affinity III                                                       | Fcgr3                | 116591        | 1.11             | 6.55                 | 7.8E-01             | 5.9E-04              | 1.00      | 1.00      | 1.00    | 1.00 |
| 1387687_at   | immunoglobulin superfamily, member 6                                                     | Igsf6                | 171064        | 1.12             | 6.53                 | 8.4E-01             | 4.0E-04              | 0.40      | 0.00      | 1.00    | 0.75 |
| 1389409_at   | similar to Testis derived transcript                                                     | LOC500040            | 500040        | 1.64             | 6.50                 | 7.9E-01             | 3.0E-04              | 0.00      | 0.00      | 1.00    | 0.00 |
| 1387627_at   | cd86 antigen                                                                             | Cd86                 | 56822         | 0.76             | 6.42                 | 8.2E-01             | 1.7E-03              | 0.00      | 0.00      | 0.80    | 0.00 |
| 1369190_at   | CD2 antigen                                                                              | Cd2                  | 497761        | 1.32             | 6.42                 | 5.8E-01             | 1.9E-03              | 0.00      | 0.00      | 0.70    | 0.00 |
| 1376130_a_at | dystrobrevin, beta                                                                       | Dnb                  | 362715        | 1.34             | 6.38                 | 8.1E-01             | 2.2E-04              | 0.00      | 0.00      | 1.00    | 0.00 |
| 1387005_at   | cathepsin S                                                                              | Cts5                 | 50654         | 0.88             | 6.37                 | 5.5E-01             | 1.9E-04              | 1.00      | 1.00      | 1.00    | 1.00 |
| 1370394_at   | gamma-2a immunoglobulin heavy chain                                                      | IgG-2a               | 367586        | 0.78             | 6.36                 | 7.7E-01             | 9.0E-03              | 0.00      | 0.00      | 0.60    | 0.00 |
| 1376304_at   | Transcribed locus                                                                        |                      |               | 1.09             | 6.36                 | 9.7E-01             | 2.0E-02              | 0.00      | 0.00      | 0.70    | 0.00 |
| 1388484_at   | ubiquitin-conjugating enzyme E2C (predicted)                                             | Ube2c_predicted      | 296368        | 0.79             | 6.31                 | 6.0E-01             | 3.7E-04              | 0.00      | 0.25      | 1.00    | 0.50 |
| 1370281_at   | fatty acid binding protein 5, epidermal                                                  | Fabp5                | 140868        | 0.95             | 6.31                 | 8.6E-01             | 1.6E-04              | 1.00      | 1.00      | 1.00    | 1.00 |
| 1389553_at   | dendritic cell inhibitory receptor 3                                                     | Dcir3                | 362431        | 0.99             | 6.30                 | 9.9E-01             | 1.5E-03              | 0.50      | 0.50      | 1.00    | 1.00 |
| 1374902_at   | IQ motif containing GTPase activating protein 3 (predicted)                              | Iqgap3_predicted     | 310621        | 0.88             | 6.28                 | 8.6E-01             | 3.3E-03              | 0.00      | 0.00      | 1.00    | 0.00 |
| 1370265_at   | arrestin, beta 2                                                                         | Arrb2                | 25388         | 1.23             | 6.19                 | 8.6E-01             | 8.1E-04              | 0.00      | 0.00      | 1.00    | 0.25 |
| 1390287_at   | bridging integrator 2                                                                    | Bin2                 | 366988        | 0.89             | 6.14                 | 9.3E-01             | 6.4E-04              | 0.00      | 0.00      | 1.00    | 0.63 |
| 1386859_at   | transketolase                                                                            | Tkt                  | 64524         | 1.05             | 6.13                 | 9.3E-01             | 1.4E-04              | 1.00      | 1.00      | 1.00    | 1.00 |
| 1387378_at   | ficolin B                                                                                | Fcnb                 | 114091        | 2.26             | 6.11                 | 2.2E-01             | 2.9E-03              | 0.00      | 0.00      | 1.00    | 0.00 |
| 1390798_at   | protein tyrosine phosphatase, receptor type, C                                           | Ptpcr                | 24699         | 1.50             | 6.09                 | 1.2E-01             | 4.2E-04              | 0.80      | 0.75      | 1.00    | 1.00 |
| 1377351_at   | sushi domain containing 3 (predicted)                                                    | Susd3_predicted      | 306810        | 0.73             | 6.04                 | 8.5E-01             | 1.6E-03              | 0.00      | 0.00      | 1.00    | 0.00 |
| 1371960_at   | YTH domain family 2 (predicted)                                                          | Ythdf2_predicted     | 313053        | 7.13             | 6.04                 | 1.2E-01             | 1.1E-03              | 1.00      | 0.25      | 1.00    | 1.00 |
| 1387269_s_at | plasminogen activator, urokinase receptor                                                | Plaur                | 50692         | 1.10             | 6.04                 | 9.3E-01             | 3.7E-04              | 0.00      | 0.00      | 1.00    | 0.00 |
| 1387992_at   | leukocyte immunoglobulin-like receptor, subfamily B (with TM and ITIM domains), member 3 | Lilrb3               | 361493        | 2.28             | 6.02                 | 5.2E-02             | 1.8E-03              | 0.40      | 0.13      | 0.80    | 0.00 |
| 1377239_at   | amyloid beta (A4) precursor protein-binding, family B, member 1 interacting protein      | Apbb1ip              | 307171        | 2.35             | 6.01                 | 4.8E-01             | 3.7E-04              | 0.30      | 0.00      | 1.00    | 0.63 |
| 1370928_at   | LPS-induced TN factor                                                                    | Ltaif                | 65161         | 1.58             | 5.99                 | 1.1E-01             | 1.6E-04              | 1.00      | 1.00      | 1.00    | 1.00 |
| 1368247_at   | heat shock 70kD protein 1A                                                               | Hspa1a               | 24472         | 1.07             | 5.98                 | 7.8E-01             | 3.7E-04              | 0.80      | 0.88      | 1.00    | 1.00 |
| 1374961_at   | similar to polyamine-modulated factor 1                                                  | LOC681050            | 681050        | 0.77             | 5.97                 | 5.8E-01             | 2.5E-03              | 0.00      | 0.00      | 0.50    | 0.00 |
| 1387608_at   | indoleamine-pyrrole 2,3 dioxygenase                                                      | Indo                 | 66029         | 0.74             | 5.95                 | 7.0E-01             | 3.8E-02              | 0.00      | 0.00      | 0.80    | 0.00 |
| 1370848_at   | solute carrier family 2 (facilitated glucose transporter), member 1                      | Slc2a1               | 24778         | 0.65             | 5.93                 | 1.5E-01             | 5.2E-04              | 0.60      | 1.00      | 1.00    | 1.00 |
| 1388337_at   | nucleoside phosphorylase (mapped)                                                        | Np                   | 290029        | 1.14             | 5.93                 | 5.8E-01             | 6.1E-04              | 1.00      | 1.00      | 1.00    | 1.00 |
| 1387984_at   | chemokine-like factor                                                                    | Klif                 | 245978        | 1.63             | 5.92                 | 7.4E-01             | 1.6E-02              | 0.00      | 0.00      | 1.00    | 0.00 |
| 1369688_s_at | protein tyrosine kinase 2 beta                                                           | Ptk2b                | 50646         | 1.37             | 5.91                 | 7.4E-01             | 1.6E-03              | 0.00      | 0.00      | 1.00    | 0.00 |
| 1371016_at   | similar to RIKEN cDNA A430107P09 gene                                                    | LOC290071            | 290071        | 0.98             | 5.89                 | 9.8E-01             | 1.3E-03              | 1.00      | 1.00      | 1.00    | 1.00 |
| 1389092_at   | interleukin 2 receptor, gamma (severe combined immunodeficiency)                         | Il2rg                | 140924        | 1.17             | 5.87                 | 5.5E-01             | 1.4E-04              | 1.00      | 1.00      | 1.00    | 1.00 |
| 1373528_at   |                                                                                          | Hck                  | 25734         | 1.05             | 5.87                 | 9.5E-01             | 4.8E-03              | 0.00      | 0.00      | 0.70    | 0.00 |
| 1371074_a_at | minichromosome maintenance deficient 6 (MISS homolog, S. pombe) (S. cerevisiae)          | Mcm6                 | 29685         | 1.84             | 5.85                 | 6.7E-01             | 1.1E-03              | 0.00      | 0.00      | 0.80    | 0.00 |
| 1373611_at   | interleukin 17 receptor (predicted)                                                      | Il17r_predicted      | 312679        | 1.82             | 5.83                 | 2.2E-01             | 5.2E-05              | 1.00      | 0.75      | 1.00    | 1.00 |
| 1389911_at   | meteorin, glial cell differentiation regulator-like                                      | Metnl                | 316842        | 0.89             | 5.83                 | 4.1E-01             | 7.2E-04              | 1.00      | 1.00      | 1.00    | 1.00 |
| 1390137_at   | TRAF4 associated factor 1                                                                | Traf4af1             | 311325        | 0.92             | 5.82                 | 9.5E-01             | 4.2E-03              | 0.00      | 0.00      | 0.50    | 0.00 |
| 1371774_at   | spermidine/spermine N1-acetyl transferase (mapped)                                       | Sat                  | 302642        | 1.32             | 5.82                 | 2.9E-01             | 1.7E-04              | 1.00      | 1.00      | 1.00    | 1.00 |
| 1392785_at   | Potassium channel tetramerisation domain containing 12 (predicted)                       | Kctd12_predicted     | 364458        | 3.12             | 5.80                 | 1.6E-01             | 3.4E-03              | 0.50      | 0.00      | 1.00    | 0.75 |
| 1369186_at   | caspase 1                                                                                | Casp1                | 25166         | 1.14             | 5.80                 | 7.7E-01             | 6.9E-04              | 1.00      | 0.75      | 1.00    | 1.00 |
| 1376709_at   | solute carrier family 39 (metal ion transporter), member 8                               | Slc39a8              | 295455        | 1.69             | 5.76                 | 1.2E-01             | 1.6E-04              | 1.00      | 0.50      | 1.00    | 1.00 |
| 1389248_at   | galactokinase 1                                                                          | Galk1                | 287835        | 0.82             | 5.73                 | 5.7E-01             | 2.4E-03              | 0.00      | 0.00      | 0.80    | 0.00 |
| 1373490_at   | Similar to chromosome 14 open reading frame 21 (predicted)                               | RGD1308396_predicted | 290235        | 1.18             | 5.72                 | 4.9E-01             | 3.0E-04              | 0.90      | 0.88      | 1.00    | 1.00 |
| 1389566_at   | cyclin B2                                                                                | Ccnb2                | 363088        | 0.93             | 5.71                 | 9.3E-01             | 1.2E-03              | 0.00      | 0.00      | 1.00    | 0.00 |
| 1376089_at   | Low density lipoprotein receptor-related protein 5 (predicted)                           | Lrp5_predicted       | 293649        | 1.70             | 5.70                 | 1.2E-01             | 1.2E-03              | 0.50      | 0.00      | 1.00    | 1.00 |
| 1369204_at   | hemopoietic cell kinase                                                                  | Hck                  | 25734         | 1.21             | 5.69                 | 2.8E-01             | 6.4E-04              | 1.00      | 1.00      | 1.00    | 1.00 |
| 1374805_at   | similar to hypothetical protein MGC5528 (predicted)                                      | RGD1561749_predicted | 299933        | 0.76             | 5.67                 | 7.3E-01             | 1.2E-02              | 0.20      | 0.25      | 0.80    | 0.00 |
| 1376073_at   | Sel1 (suppressor of lin-12) 1 homolog (C. elegans)                                       | Sel1h                | 314352        | 2.25             | 5.66                 | 4.2E-01             | 6.5E-03              | 0.00      | 0.00      | 1.00    | 0.00 |
| 1376026_at   | downstream neighbor of SON                                                               | Donson               | 288257        | 0.67             | 5.65                 | 4.6E-01             | 4.8E-02              | 0.00      | 0.00      | 1.00    | 0.00 |
| 1384787_at   | CD3 antigen, gamma polypeptide                                                           | Cd3g                 | 300678        | 1.39             | 5.65                 | 7.6E-01             | 2.5E-03              | 0.00      | 0.00      | 1.00    | 0.00 |
| 1369724_at   | coagulation factor XIII, A1 subunit                                                      | F13a1                | 60327         | 1.33             | 5.64                 | 7.0E-01             | 1.1E-03              | 0.70      | 0.25      | 1.00    | 0.63 |
| 1389030_a_at | Rous sarcoma oncogene                                                                    | Src                  | 83805         | 1.42             | 5.62                 | 8.6E-01             | 1.7E-02              | 0.00      | 0.00      | 0.70    | 0.00 |
| 1370603_a_at | protein tyrosine phosphatase, receptor type, C                                           | Ptpcr                | 24699         | 0.86             | 5.62                 | 9.0E-01             | 2.0E-02              | 0.00      | 0.00      | 1.00    | 0.00 |

| Probe Set ID | Gene Title                                                                                   | Gene Symbol          | Entrez Gene ID | Fold Change   |                  | False Discovery Rate |                      | Average Present Call |           |           |          |
|--------------|----------------------------------------------------------------------------------------------|----------------------|----------------|---------------|------------------|----------------------|----------------------|----------------------|-----------|-----------|----------|
|              |                                                                                              |                      |                | Strain Effect | Rejection Effect | Native BN / DA       | Allograft / Isograft | Native BN            | Native DA | Allograft | Isograft |
| 1377058_at   | similar to solute carrier family 37 (glycerol-3-phosphate transporter), member 2 (predicted) | RGD1564160_predicted | 500973         | 0.36          | 5.60             | 5.0E-01              | 2.8E-03              | 0.00                 | 0.00      | 1.00      | 0.00     |
| 1376076_at   | Membrane protein, palmitoylated 5 (MAGUK p55 subfamily member 5) (predicted)                 | Mpp5_predicted       | 314259         | 0.96          | 5.56             | 9.1E-01              | 2.8E-04              | 1.00                 | 0.75      | 1.00      | 1.00     |
| 1387759_s_at | UDP glycosyltransferase 1 family, polypeptide A1                                             | Ugt1a1               | 113992         | 1.61          | 5.56             | 1.4E-01              | 7.9E-04              | 0.60                 | 0.00      | 1.00      | 0.75     |
| 1398303_s_at | tropomyosin 3, gamma                                                                         | Tpm3                 | 117557         | 1.55          | 5.54             | 1.6E-01              | 3.1E-03              | 0.70                 | 0.00      | 1.00      | 1.00     |
| 1370469_at   | protein tyrosine phosphatase, non-receptor type 7                                            | Ptpn7                | 246781         | 0.92          | 5.53             | 9.6E-01              | 9.6E-03              | 0.00                 | 0.00      | 0.90      | 0.00     |
| 1373746_at   | similar to HSPC049 protein (predicted)                                                       | RGD1306697_predicted | 312225         | 0.53          | 5.53             | 6.8E-01              | 7.9E-04              | 0.20                 | 0.00      | 1.00      | 0.00     |
| 1389695_at   | similar to cDNA sequence BC040444                                                            | RGD1311980           | 304334         | 1.01          | 5.53             | 9.9E-01              | 1.1E-04              | 0.20                 | 0.25      | 1.00      | 1.00     |
| 1377185_at   | similar to RIKEN cDNA 6330442E10 gene (predicted)                                            | RGD1562622_predicted | 503035         | 0.86          | 5.52             | 7.9E-01              | 9.7E-03              | 0.00                 | 0.00      | 0.70      | 0.00     |
| 1370024_at   | Similar to RIKEN cDNA 4931400A14 (predicted)                                                 | RGD1307234_predicted | 316732         | 0.96          | 5.52             | 9.9E-01              | 4.8E-02              | 0.00                 | 0.00      | 1.00      | 0.00     |
| 1376231_at   | similar to Hypothetical UPF0080 protein KIAA0186 (predicted)                                 | RGD1562246_predicted | 499914         | 1.43          | 5.51             | 7.9E-01              | 1.4E-02              | 0.00                 | 0.00      | 0.50      | 0.00     |
| 1377023_at   | dual specificity phosphatase 2                                                               | Dusp2                | 311406         | 1.15          | 5.49             | 7.7E-01              | 2.5E-04              | 0.50                 | 0.63      | 1.00      | 0.38     |
| 1387742_at   | chemokine (C-C motif) receptor 2                                                             | Ccr2                 | 60463          | 1.13          | 5.49             | 9.1E-01              | 8.2E-03              | 0.00                 | 0.00      | 0.60      | 0.00     |
| 1388272_at   | immunoglobulin heavy chain 1a (serum IgG2a)                                                  | Igh-1a               | 299352         | 1.09          | 5.47             | 9.6E-01              | 1.1E-02              | 0.00                 | 0.00      | 0.80      | 0.00     |
| 1369815_at   | chemokine (C-C motif) ligand 3                                                               | Ccl3                 | 25542          | 0.84          | 5.47             | 8.5E-01              | 3.7E-04              | 0.00                 | 0.00      | 1.00      | 0.38     |
| 1375428_at   | cellular repressor of E1A-stimulated genes (predicted)                                       | Creg_predicted       | 289185         | 1.61          | 5.45             | 3.8E-01              | 4.3E-04              | 1.00                 | 0.75      | 1.00      | 0.38     |
| 1367955_at   | RAB4B, member RAS oncogene family                                                            | Rab4b                | 50866          | 1.61          | 5.44             | 4.8E-01              | 1.5E-02              | 0.00                 | 0.00      | 0.60      | 0.00     |
| 1370234_at   | fibronectin 1                                                                                | Fn1                  | 25661          | 1.65          | 5.41             | 2.5E-01              | 1.5E-03              | 1.00                 | 1.00      | 1.00      | 1.00     |
| 1387180_at   | interleukin 1 receptor, type II                                                              | Il1r2                | 117022         | 1.63          | 5.39             | 6.3E-01              | 5.6E-02              | 0.20                 | 0.00      | 1.00      | 0.00     |
| 1386879_at   | lectin, galactose binding, soluble 3                                                         | Lgals3               | 83781          | 1.24          | 5.39             | 6.5E-01              | 4.1E-04              | 1.00                 | 1.00      | 1.00      | 1.00     |
| 1370942_at   | RAS p21 protein activator 3                                                                  | Rasa3                | 29372          | 2.06          | 5.37             | 5.4E-01              | 1.0E-02              | 0.00                 | 0.00      | 1.00      | 1.00     |
| 1370883_at   | RTI class II, locus Da                                                                       | RT1-Da               | 294269         | 0.89          | 5.34             | 6.9E-01              | 4.3E-04              | 1.00                 | 1.00      | 1.00      | 1.00     |
| 1368527_at   | prostaglandin-endoperoxide synthase 2                                                        | Ptgs2                | 29527          | 0.73          | 5.34             | 8.5E-01              | 1.2E-02              | 0.10                 | 0.13      | 1.00      | 0.75     |
| 1369181_at   | cytochrome b-245, beta polypeptide                                                           | Cybb                 | 66021          | 1.01          | 5.33             | 9.9E-01              | 7.1E-04              | 0.20                 | 0.25      | 1.00      | 0.50     |
| 1383426_at   | proline-serine-threonine phosphatase-interacting protein 1 (predicted)                       | Pstpip1_predicted    | 300732         | 1.11          | 5.33             | 7.6E-01              | 4.4E-05              | 0.60                 | 0.75      | 1.00      | 0.88     |
| 1369683_at   | BH3 interacting domain death agonist                                                         | Bid                  | 64625          | 2.09          | 5.33             | 4.5E-01              | 3.3E-02              | 0.00                 | 0.00      | 0.80      | 0.00     |
| 1388265_x_at | chondroitin sulfate proteoglycan 2                                                           | Cspg2                | 114122         | 0.64          | 5.30             | 6.1E-01              | 1.5E-02              | 0.00                 | 0.00      | 1.00      | 0.13     |
| 1387101_at   | acyl-CoA synthetase long-chain family member 4                                               | Acsl4                | 113976         | 1.16          | 5.27             | 3.6E-01              | 2.4E-04              | 1.00                 | 1.00      | 1.00      | 1.00     |
| 1368742_at   | complement component 5, receptor 1                                                           | C5r1                 | 113959         | 1.15          | 5.27             | 6.7E-01              | 3.2E-04              | 1.00                 | 1.00      | 1.00      | 1.00     |
| 1367856_at   | glucose-6-phosphate dehydrogenase X-linked                                                   | G6pdx                | 24377          | 2.20          | 5.26             | 3.3E-01              | 4.4E-05              | 1.00                 | 0.25      | 1.00      | 1.00     |
| 1370967_at   | Claudin 10 (predicted)                                                                       | Cldn10_predicted     | 290485         | 2.07          | 5.25             | 5.5E-01              | 1.3E-02              | 0.00                 | 0.00      | 1.00      | 0.50     |
| 1368260_at   | aurora kinase B                                                                              | Aurkb                | 114592         | 1.14          | 5.24             | 8.8E-01              | 6.3E-04              | 0.60                 | 0.00      | 1.00      | 0.50     |
| 1368407_at   | heparinase                                                                                   | Hpsa                 | 64537          | 3.26          | 5.23             | 4.1E-01              | 2.0E-02              | 0.00                 | 0.00      | 1.00      | 0.00     |
| 1370832_at   | Alpha thalassemia/mental retardation syndrome X-linked homolog (human)                       | Atrx                 | 246284         | 0.84          | 5.22             | 4.7E-01              | 9.9E-04              | 1.00                 | 1.00      | 1.00      | 1.00     |
| 1389123_at   | chemokine (C-C motif) ligand 6                                                               | Ccl6                 | 287910         | 1.73          | 5.22             | 2.7E-01              | 8.9E-04              | 1.00                 | 1.00      | 1.00      | 1.00     |
| 1387969_at   | chemokine (C-X-C motif) ligand 10                                                            | Cxcl10               | 245920         | 1.54          | 5.21             | 4.7E-02              | 9.4E-03              | 0.80                 | 0.13      | 1.00      | 0.75     |
| 1370585_a_at | protein kinase C, beta 1                                                                     | Prkcb1               | 25023          | 1.32          | 5.20             | 5.4E-01              | 4.6E-04              | 1.00                 | 1.00      | 1.00      | 1.00     |
| 1379766_at   | Src-like adaptor                                                                             | Sla                  | 338477         | 1.59          | 5.14             | 6.7E-01              | 3.0E-04              | 0.00                 | 0.00      | 1.00      | 0.63     |
| 1390659_at   | Transcribed locus                                                                            |                      |                | 1.43          | 5.13             | 3.8E-01              | 1.5E-04              | 1.00                 | 1.00      | 1.00      | 1.00     |
| 1390389_at   | C-mer proto-oncogene tyrosine kinase                                                         | Merik                | 65037          | 0.92          | 5.10             | 9.1E-01              | 9.7E-04              | 0.00                 | 0.00      | 1.00      | 0.00     |
| 1390674_at   | Transcribed locus                                                                            |                      |                | 0.56          | 5.08             | 3.7E-01              | 1.3E-02              | 0.00                 | 0.00      | 0.60      | 0.00     |
| 1372200_at   | G-protein signalling modulator 3 (AGS3-like, C. elegans)                                     | Gpsm3                | 406163         | 1.05          | 5.08             | 9.8E-01              | 1.3E-03              | 0.00                 | 0.00      | 1.00      | 0.25     |
| 1389413_at   | similar to ecotropic viral integration site 2A                                               | LOC685433            | 685433         | 0.67          | 5.06             | 5.0E-01              | 2.0E-04              | 0.00                 | 0.00      | 1.00      | 0.50     |
| 1389006_at   | Transcribed locus                                                                            |                      |                | 1.38          | 5.03             | 4.9E-01              | 7.9E-04              | 0.70                 | 0.00      | 1.00      | 1.00     |
| 1368921_a_at | CD44 antigen                                                                                 | Cd44                 | 25406          | 1.33          | 5.02             | 6.4E-01              | 1.2E-04              | 0.80                 | 0.38      | 1.00      | 1.00     |
| 1388142_at   | chondroitin sulfate proteoglycan 2                                                           | Cspg2                | 114122         | 1.13          | 5.01             | 8.6E-01              | 6.7E-03              | 0.40                 | 0.25      | 1.00      | 0.75     |
| 1369672_at   | archidonate 5-lipoxygenase activating protein                                                | Alox5ap              | 29624          | 1.18          | 4.99             | 7.6E-01              | 1.1E-03              | 1.00                 | 0.38      | 1.00      | 1.00     |
| 1368027_at   | thromboxane A synthase 1                                                                     | Tbxas1               | 24886          | 0.99          | 4.99             | 9.8E-01              | 1.3E-04              | 0.00                 | 0.13      | 1.00      | 0.88     |
| 1370186_at   | proteasome (prosome, macropain) subunit, beta type 9                                         | Psmb9                | 24967          | 0.92          | 4.97             | 7.7E-01              | 1.3E-03              | 1.00                 | 1.00      | 1.00      | 1.00     |
| 1377867_at   | similar to Glutaminy-peptide cyclotransferase precursor (QC) (predicted)                     | RGD1562284_predicted | 313837         | 0.64          | 4.97             | 2.9E-01              | 7.8E-04              | 0.20                 | 0.88      | 1.00      | 0.88     |
| 1368000_at   | complement component 3                                                                       | C3                   | 24232          | 1.53          | 4.95             | 3.6E-01              | 2.9E-03              | 1.00                 | 0.88      | 1.00      | 1.00     |
| 1368412_a_at | protein tyrosine phosphatase, receptor type, O                                               | Ptpro                | 50677          | 0.77          | 4.93             | 4.6E-01              | 9.9E-04              | 0.00                 | 0.00      | 1.00      | 1.00     |
| 1368179_at   | thymic stromal-derived lymphopoietin, receptor                                               | Tslpr                | 171499         | 1.64          | 4.92             | 6.2E-01              | 5.7E-03              | 0.00                 | 0.00      | 1.00      | 0.00     |
| 1376675_at   | similar to CD300A antigen                                                                    | LOC501736            | 501736         | 0.97          | 4.92             | 9.6E-01              | 9.8E-04              | 0.00                 | 0.00      | 1.00      | 0.75     |
| 1370097_a_at | chemokine (C-X-C motif) receptor 4                                                           | Cxcr4                | 60628          | 1.43          | 4.92             | 3.0E-01              | 6.5E-04              | 1.00                 | 0.75      | 1.00      | 1.00     |
| 1368799_at   | baculoviral IAP repeat-containing 5                                                          | Birc5                | 64041          | 1.28          | 4.91             | 8.4E-01              | 1.5E-02              | 0.00                 | 0.00      | 0.60      | 0.00     |
| 1368046_at   | solute carrier family 31 (copper transporters), member 1                                     | Slc31a1              | 171135         | 2.87          | 4.90             | 2.9E-01              | 3.3E-02              | 0.00                 | 0.00      | 0.60      | 0.00     |
| 1389440_at   | Transcribed locus                                                                            |                      |                | 1.03          | 4.88             | 9.9E-01              | 4.3E-03              | 0.00                 | 0.00      | 0.90      | 0.00     |
| 1369031_at   | interleukin 18 binding protein                                                               | Il18bp               | 84388          | 0.83          | 4.87             | 4.3E-01              | 1.3E-03              | 0.90                 | 1.00      | 1.00      | 1.00     |
| 1388650_at   | topoisomerase (DNA) 2 alpha                                                                  | Top2a                | 360243         | 1.01          | 4.87             | 9.9E-01              | 2.4E-03              | 0.00                 | 0.00      | 1.00      | 0.50     |
| 1371961_at   | phospholipase D family, member 3                                                             | Pld3                 | 361527         | 1.04          | 4.87             | 9.4E-01              | 1.7E-03              | 0.80                 | 0.63      | 1.00      | 1.00     |
| 1387952_a_at | CD44 antigen                                                                                 | Cd44                 | 25406          | 2.43          | 4.85             | 1.1E-01              | 2.4E-03              | 0.00                 | 0.00      | 1.00      | 0.50     |
| 1373207_at   | Transcribed locus                                                                            |                      |                | 0.63          | 4.83             | 4.5E-01              | 7.2E-04              | 0.00                 | 0.25      | 1.00      | 1.00     |
| 1387956_s_at | chemokine-like factor                                                                        | Klfl                 | 245978         | 0.90          | 4.81             | 9.5E-01              | 1.6E-02              | 0.00                 | 0.00      | 0.80      | 0.00     |
| 1376914_at   | DEP domain containing 1a (predicted)                                                         | Depdc1a_predicted    | 295538         | 0.87          | 4.81             | 9.2E-01              | 7.5E-02              | 0.00                 | 0.00      | 0.70      | 0.00     |
| 1379387_at   | Regulator of G-protein signaling 18                                                          | Rgs18                | 289076         | 1.07          | 4.77             | 9.6E-01              | 7.2E-03              | 0.00                 | 0.00      | 1.00      | 0.50     |
| 1376784_at   | Formin binding protein 1                                                                     | Fnbp1                | 192348         | 1.89          | 4.76             | 5.9E-01              | 1.3E-02              | 0.00                 | 0.00      | 0.90      | 0.00     |
| 1372064_at   | similar to chemokine (C-X-C motif) ligand 16                                                 | Cxcl16               | 497942         | 0.94          | 4.75             | 8.7E-01              | 3.3E-04              | 1.00                 | 1.00      | 1.00      | 1.00     |
| 1393688_at   | Complement component 6                                                                       | C6                   | 24237          | 1.22          | 4.75             | 9.0E-01              | 4.2E-04              | 0.00                 | 0.00      | 1.00      | 0.25     |
| 1370339_at   |                                                                                              |                      |                | 0.89          | 4.75             | 4.2E-01              | 2.0E-04              | 1.00                 | 1.00      | 1.00      | 1.00     |
| 1370740_at   | killer cell lectin-like receptor, subfamily A, member 5                                      | Klra5                | 297666         | 1.10          | 4.75             | 9.7E-01              | 1.4E-02              | 0.00                 | 0.00      | 1.00      | 0.13     |
| 1376943_at   |                                                                                              |                      |                | 1.09          | 4.73             | 8.6E-01              | 4.8E-04              | 0.90                 | 0.50      | 1.00      | 0.75     |
| 1387808_at   | solute carrier family 7 (cationic amino acid transporter, y+ system), member 7               | Slc7a7               | 83509          | 1.20          | 4.72             | 5.8E-01              | 3.7E-04              | 1.00                 | 1.00      | 1.00      | 1.00     |
| 1388460_at   | capping protein (actin filament), gelsolin-like                                              | Capg                 | 297339         | 0.98          | 4.72             | 9.5E-01              | 2.8E-04              | 1.00                 | 1.00      | 1.00      | 1.00     |
| 1373504_at   | GL1 pathogenesis-related 1 (glioma)                                                          | Glipr1               | 299783         | 1.06          | 4.71             | 7.9E-01              | 5.1E-04              | 1.00                 | 1.00      | 1.00      | 1.00     |
| 1374544_at   | hypothetical protein LOC679150                                                               | LOC679150            | 679150         | 1.29          | 4.71             | 4.8E-01              | 1.2E-04              | 0.00                 | 0.00      | 1.00      | 0.63     |
| 1387048_at   | DEAD (Asp-Glu-Ala-Asp) box polypeptide 39                                                    | Ddx39                | 89827          | 1.03          | 4.70             | 9.4E-01              | 6.4E-04              | 0.80                 | 0.38      | 1.00      | 1.00     |
| 1388149_at   | transporter 1, ATP-binding cassette, sub-family B (MDR/TAP)                                  | Tap1                 | 24811          | 1.66          | 4.70             | 6.7E-01              | 4.4E-04              | 0.00                 | 0.00      | 1.00      | 0.00     |

| Probe Set ID | Gene Title                                                                               | Gene Symbol          | Fold Change   |                  | False Discovery Rate |                       | Average Present Call |           |           |           |      |
|--------------|------------------------------------------------------------------------------------------|----------------------|---------------|------------------|----------------------|-----------------------|----------------------|-----------|-----------|-----------|------|
|              |                                                                                          |                      | Strain Effect | Rejection Effect | Native BN / DA       | Allograft / Iso graft | Native BN            | Native DA | Allograft | Iso graft |      |
| 1368207_at   | FXVD domain-containing ion transport regulator 5                                         | Fxyd5                | 60338         | 1.27             | 4.69                 | 5.7E-01               | 4.1E-04              | 1.00      | 0.75      | 1.00      | 1.00 |
| 1387834_at   | megakaryocyte-associated tyrosine kinase                                                 | Matk                 | 60450         | 1.39             | 4.69                 | 8.6E-01               | 1.4E-02              | 0.00      | 0.00      | 1.00      | 0.00 |
| 1373575_at   | similar to NADH dehydrogenase (ubiquinone) Fe-S protein 2                                | LOC498279            | 498279        | 1.31             | 4.69                 | 1.5E-01               | 5.5E-04              | 1.00      | 1.00      | 1.00      | 1.00 |
| 1368808_at   | CAP, adenylate cyclase-associated protein 1 (yeast)                                      | Cap1                 | 64185         | 1.67             | 4.69                 | 1.3E-01               | 1.3E-03              | 1.00      | 0.50      | 1.00      | 1.00 |
| 1368975_at   | CD38 antigen                                                                             | Cd38                 | 25668         | 0.90             | 4.68                 | 8.8E-01               | 8.4E-04              | 0.00      | 0.50      | 1.00      | 0.75 |
| 1368826_at   | catechol-O-methyltransferase                                                             | Comt                 | 24267         | 0.95             | 4.68                 | 7.9E-01               | 3.9E-04              | 1.00      | 1.00      | 1.00      | 1.00 |
| 1368464_at   | macrophage galactose N-acetyl-galactosamine specific lectin 1                            | Mgl1                 | 64195         | 0.92             | 4.67                 | 8.8E-01               | 1.4E-03              | 0.00      | 0.00      | 1.00      | 1.00 |
| 1375211_at   | ribonuclease T2 (predicted)                                                              | Rnaset2_predicted    | 292306        | 1.02             | 4.67                 | 9.6E-01               | 2.8E-04              | 1.00      | 1.00      | 1.00      | 1.00 |
| 1373823_at   | similar to Cyclin-dependent kinases regulatory subunit 2 (CKS-2) (predicted)             | RGD1562047_predicted | 498709        | 1.45             | 4.67                 | 8.2E-01               | 3.0E-03              | 0.00      | 0.00      | 1.00      | 0.38 |
| 1371803_at   | GM2 ganglioside activator protein                                                        | Gm2a                 | 282838        | 1.07             | 4.65                 | 9.2E-01               | 5.3E-04              | 0.90      | 0.63      | 1.00      | 1.00 |
| 1390850_at   | Adipose differentiation related protein                                                  | Adfp                 | 298199        | 2.43             | 4.65                 | 4.9E-01               | 4.4E-04              | 0.00      | 0.00      | 1.00      | 0.00 |
| 1372082_at   | NECAP endocytosis associated 2                                                           | Necap2               | 298598        | 1.03             | 4.65                 | 9.7E-01               | 2.5E-04              | 1.00      | 1.00      | 1.00      | 1.00 |
| 1388848_at   | similar to hypothetical protein MGC13251                                                 | RGD1308350           | 362790        | 0.80             | 4.64                 | 5.5E-01               | 3.7E-03              | 0.00      | 0.00      | 1.00      | 0.00 |
| 1369173_at   | complement component 3a receptor 1                                                       | C3ar1                | 84007         | 1.78             | 4.63                 | 6.2E-01               | 6.5E-04              | 1.00      | 0.25      | 1.00      | 0.63 |
| 1372852_at   | similar to protein tyrosine phosphatase, receptor type, C polypeptide-associated protein | LOC499300            | 499300        | 0.69             | 4.63                 | 7.4E-01               | 1.5E-03              | 0.00      | 0.00      | 1.00      | 0.25 |
| 1371184_x_at | tropomyosin 3, gamma                                                                     | Tpm3                 | 117557        | 0.79             | 4.62                 | 7.3E-01               | 5.6E-03              | 1.00      | 0.75      | 1.00      | 1.00 |
| 1370393_at   | coiled-coil domain containing 5                                                          | Ccdc5                | 192228        | 1.88             | 4.60                 | 6.6E-01               | 1.2E-02              | 0.00      | 0.00      | 0.70      | 0.00 |
| 1377153_a_at | kelch-like 6 (Drosophila) (predicted)                                                    | Klhl6_predicted      | 287974        | 1.38             | 4.60                 | 4.3E-01               | 4.6E-04              | 1.00      | 0.75      | 1.00      | 1.00 |
| 1371782_at   | nipsnap homolog 3A (C. elegans)                                                          | Nipsnap3a            | 313211        | 0.75             | 4.60                 | 7.6E-01               | 2.7E-04              | 0.00      | 0.00      | 1.00      | 0.75 |
| 1389997_at   | CD3 antigen, epsilon polypeptide (predicted)                                             | Cd3e_predicted       | 315609        | 0.76             | 4.60                 | 7.7E-01               | 1.3E-03              | 0.00      | 0.00      | 1.00      | 0.00 |
| 1387202_at   | intercellular adhesion molecule 1                                                        | Icam1                | 25464         | 1.82             | 4.58                 | 4.3E-01               | 5.7E-03              | 0.00      | 0.00      | 1.00      | 0.25 |
| 1368455_at   | natural killer cell group 7 sequence                                                     | Nkg7                 | 171062        | 1.20             | 4.58                 | 6.8E-01               | 3.6E-03              | 0.80      | 0.75      | 1.00      | 1.00 |
| 1371646_at   | phosphogluconate dehydrogenase (mapped)                                                  | Pgd                  | 362660        | 1.11             | 4.57                 | 8.0E-01               | 3.0E-04              | 1.00      | 1.00      | 1.00      | 1.00 |
| 1388275_at   | T-cell receptor beta chain                                                               | Terb                 | 24820         | 1.12             | 4.57                 | 9.5E-01               | 1.7E-03              | 0.00      | 0.13      | 1.00      | 0.50 |
| 1369814_at   | chemokine (C-C motif) ligand 20                                                          | Ccl20                | 29538         | 1.07             | 4.55                 | 9.5E-01               | 1.1E-02              | 0.20      | 0.00      | 1.00      | 0.00 |
| 1376006_at   | Transcribed locus                                                                        |                      |               | 1.06             | 4.53                 | 8.5E-01               | 2.2E-04              | 0.60      | 0.13      | 1.00      | 1.00 |
| 1377340_at   | tissue factor pathway inhibitor 2                                                        | Tfpi2                | 286926        | 1.29             | 4.52                 | 6.2E-01               | 1.7E-03              | 1.00      | 0.75      | 1.00      | 1.00 |
| 1383684_at   | ASF1 anti-silencing function 1 homolog B (S. cerevisiae) (predicted)                     | Asf1b_predicted      | 304648        | 1.10             | 4.51                 | 9.2E-01               | 1.2E-03              | 0.20      | 0.25      | 1.00      | 0.50 |
| 1372516_at   | kinesin family member 22                                                                 | Kif22                | 293502        | 1.36             | 4.51                 | 5.4E-01               | 3.6E-04              | 0.00      | 0.00      | 1.00      | 0.00 |
| 1387667_at   | nitric oxide synthase 2, inducible                                                       | Nos2                 | 24599         | 1.15             | 4.50                 | 8.9E-01               | 3.6E-03              | 0.00      | 0.13      | 1.00      | 0.00 |
| 1377832_at   | polo-like kinase 4 (Drosophila) (predicted)                                              | Plk4_predicted       | 310344        | 0.52             | 4.50                 | 4.3E-01               | 3.6E-03              | 0.20      | 1.00      | 1.00      | 0.25 |
| 1390325_at   | CD38 antigen                                                                             | Cd38                 | 25668         | 0.88             | 4.49                 | 4.3E-01               | 1.4E-04              | 1.00      | 1.00      | 1.00      | 1.00 |
| 1387483_at   | phospholipase C, gamma 2                                                                 | Plcg2                | 29337         | 1.09             | 4.48                 | 9.6E-01               | 1.7E-02              | 0.00      | 0.00      | 0.70      | 0.00 |
| 1368679_a_at | Yamaguchi sarcoma viral (v-yes-1) oncogene homolog                                       | Lyn                  | 81515         | 1.13             | 4.48                 | 8.1E-01               | 8.5E-04              | 1.00      | 1.00      | 1.00      | 1.00 |
| 1368187_at   | glycoprotein (transmembrane) nmh                                                         | Gpnmh                | 113955        | 1.77             | 4.46                 | 2.2E-01               | 7.4E-03              | 1.00      | 0.00      | 1.00      | 1.00 |
| 1370912_at   | heat shock 70kD protein 1B (mapped)                                                      | Hspa1b               | 294254        | 1.45             | 4.46                 | 1.1E-01               | 2.8E-04              | 1.00      | 1.00      | 1.00      | 1.00 |
| 1368258_at   | apelin, AGTRL1 ligand                                                                    | Apln                 | 58812         | 0.78             | 4.45                 | 5.4E-01               | 3.7E-04              | 1.00      | 1.00      | 1.00      | 0.63 |
| 1386925_at   | actin related protein 2/3 complex, subunit 1B                                            | Arpc1b               | 54227         | 1.43             | 4.45                 | 8.1E-02               | 1.3E-04              | 1.00      | 1.00      | 1.00      | 1.00 |
| 1368379_at   | scavenger receptor class B, member 2                                                     | Scarb2               | 117106        | 0.72             | 4.45                 | 3.5E-01               | 5.1E-04              | 0.40      | 0.63      | 1.00      | 1.00 |
| 1387154_at   | neuropeptide Y                                                                           | Npy                  | 24604         | 0.67             | 4.43                 | 1.9E-01               | 1.8E-03              | 1.00      | 1.00      | 1.00      | 1.00 |
| 1372585_at   | RGD1566254 (predicted)                                                                   | RGD1566254_predicted | 499318        | 1.17             | 4.42                 | 6.3E-01               | 1.0E-03              | 1.00      | 1.00      | 1.00      | 1.00 |
| 1367905_at   | ectonucleotide pyrophosphatase/phosphodiesterase 3                                       | Enpp3                | 54410         | 1.83             | 4.39                 | 8.7E-02               | 3.8E-04              | 1.00      | 0.75      | 1.00      | 1.00 |
| 1367632_at   | glutamate-ammonia ligase (glutamine synthase)                                            | Glul                 | 24957         | 1.49             | 4.36                 | 2.7E-01               | 1.3E-04              | 1.00      | 1.00      | 1.00      | 1.00 |
| 1368010_at   | protein tyrosine phosphatase, non-receptor type 6                                        | Ptpn6                | 116689        | 0.98             | 4.36                 | 9.3E-01               | 4.8E-04              | 0.00      | 0.25      | 1.00      | 1.00 |
| 1367676_at   | high mobility group box 2                                                                | Hmgb2                | 29395         | 1.47             | 4.35                 | 1.9E-01               | 6.3E-04              | 1.00      | 1.00      | 1.00      | 1.00 |
| 1387076_at   | hypoxia inducible factor 1, alpha subunit                                                | Hif1a                | 29560         | 1.02             | 4.35                 | 9.6E-01               | 4.4E-05              | 1.00      | 1.00      | 1.00      | 1.00 |
| 1371946_at   | kidney predominant protein NCU-G1                                                        | RGD1303130           | 295231        | 1.10             | 4.33                 | 8.0E-01               | 2.7E-04              | 1.00      | 1.00      | 1.00      | 1.00 |
| 1390226_at   | similar to hypothetical protein LOC340061 (predicted)                                    | RGD1562552_predicted | 498840        | 1.81             | 4.33                 | 6.4E-01               | 5.4E-04              | 0.00      | 0.00      | 1.00      | 0.00 |
| 1369979_at   | src family associated phosphoprotein 2                                                   | Scap2                | 155183        | 1.26             | 4.32                 | 6.0E-01               | 2.7E-03              | 0.00      | 0.00      | 1.00      | 0.50 |
| 1367776_at   | cell division cycle 2 homolog A (S. pombe)                                               | Cdc2a                | 54237         | 0.89             | 4.32                 | 9.0E-01               | 2.8E-03              | 0.00      | 0.00      | 1.00      | 0.38 |
| 1370531_a_at | phospholipase D1                                                                         | Pld1                 | 25096         | 1.03             | 4.31                 | 9.9E-01               | 1.7E-02              | 0.00      | 0.00      | 1.00      | 0.00 |
| 1374778_at   | Similar to GA binding protein transcription factor, beta subunit 2 (GABPB2) (predicted)  | RGD1560391_predicted | 499883        | 1.28             | 4.29                 | 5.4E-01               | 2.2E-04              | 1.00      | 1.00      | 1.00      | 1.00 |
| 1367633_at   | glutamate-ammonia ligase (glutamine synthase)                                            | Glul                 | 24957         | 1.42             | 4.26                 | 1.3E-01               | 1.5E-03              | 1.00      | 1.00      | 1.00      | 1.00 |
| 1368420_at   | ceruloplasmin                                                                            | Cp                   | 24268         | 1.24             | 4.26                 | 7.2E-01               | 7.6E-04              | 0.90      | 0.50      | 1.00      | 1.00 |
| 1387918_at   | tropomyosin 3, gamma                                                                     | Tpm3                 | 117557        | 1.74             | 4.26                 | 5.7E-01               | 3.2E-03              | 0.00      | 0.00      | 0.80      | 0.00 |
| 1388784_at   | colony stimulating factor 1 receptor                                                     | Csf1r                | 307403        | 1.34             | 4.25                 | 4.6E-01               | 1.2E-04              | 1.00      | 1.00      | 1.00      | 1.00 |
| 1373661_a_at | chemokine (C-X-C motif) receptor 4                                                       | Cxcr4                | 60628         | 1.05             | 4.25                 | 9.2E-01               | 6.2E-04              | 1.00      | 1.00      | 1.00      | 1.00 |
| 1372890_at   | Transcribed locus                                                                        |                      |               | 0.53             | 4.24                 | 1.7E-01               | 4.9E-04              | 0.00      | 0.00      | 1.00      | 0.25 |
| 1370177_at   | poliovirus receptor                                                                      | PVR                  | 25066         | 1.74             | 4.21                 | 3.4E-01               | 1.1E-03              | 0.30      | 0.00      | 1.00      | 0.00 |
| 1372056_at   | CKLF-like MARVEL transmembrane domain containing 6                                       | Cntm6                | 316035        | 1.11             | 4.19                 | 7.7E-01               | 1.9E-04              | 1.00      | 1.00      | 1.00      | 1.00 |
| 1373850_at   | sphingomyelin phosphodiesterase, acid-like 3B                                            | Smpd3b               | 362619        | 1.20             | 4.19                 | 7.9E-01               | 1.5E-03              | 0.00      | 0.00      | 0.90      | 0.00 |
| 1372404_at   | RAS-related C3 botulinum substrate 2                                                     | Rac2                 | 366957        | 1.02             | 4.19                 | 9.2E-01               | 3.5E-03              | 1.00      | 1.00      | 1.00      | 1.00 |
| 1372478_at   | similar to chemokine-like factor super family 7                                          | LOC501065            | 501065        | 1.10             | 4.18                 | 4.9E-01               | 5.4E-04              | 1.00      | 0.50      | 1.00      | 1.00 |
| 1376151_a_at | Similar to novel protein similar to human oligophrenin 1 (OPHN1) (predicted)             | RGD1564081_predicted | 500943        | 1.18             | 4.17                 | 5.5E-01               | 4.6E-03              | 1.00      | 1.00      | 1.00      | 1.00 |
| 1389250_at   | Transcribed locus                                                                        |                      |               | 1.11             | 4.14                 | 9.4E-01               | 1.9E-03              | 0.00      | 0.00      | 1.00      | 0.25 |
| 1377385_at   | Rho GTPase activating protein 27                                                         | Arhgap27             | 303583        | 3.29             | 4.14                 | 2.5E-01               | 1.1E-02              | 0.00      | 0.00      | 1.00      | 0.38 |
| 1368073_at   | interferon regulatory factor 1                                                           | Irf1                 | 24508         | 1.40             | 4.14                 | 3.5E-01               | 1.2E-03              | 1.00      | 1.00      | 1.00      | 1.00 |
| 1370219_at   | cytochrome b-245, alpha polypeptide                                                      | Cyba                 | 79129         | 0.99             | 4.13                 | 9.8E-01               | 1.2E-03              | 1.00      | 1.00      | 1.00      | 1.00 |
| 1372303_at   | similar to 0910001 A06Rk protein (predicted)                                             | RGD1307697_predicted | 299909        | 0.99             | 4.13                 | 9.9E-01               | 1.8E-03              | 1.00      | 0.88      | 1.00      | 1.00 |
| 1387057_at   | solute carrier family 7 (cationic amino acid transporter, y+ system), member 8           | Slc7a8               | 192117        | 1.46             | 4.12                 | 6.5E-01               | 3.3E-03              | 0.00      | 0.00      | 0.80      | 0.00 |
| 1371529_at   | receptor (TNFRSF)-interacting serine-threonine kinase 1 (predicted)                      | Ripk1_predicted      | 306886        | 1.56             | 4.12                 | 7.7E-01               | 9.3E-04              | 0.00      | 0.00      | 1.00      | 0.25 |
| 1367677_at   | peroxiredoxin 5                                                                          | Prdx5                | 113898        | 0.96             | 4.11                 | 9.5E-01               | 3.7E-04              | 1.00      | 1.00      | 1.00      | 1.00 |
| 1387354_at   | signal transducer and activator of transcription 1                                       | Stat1                | 25124         | 1.36             | 4.10                 | 3.4E-01               | 2.2E-04              | 1.00      | 1.00      | 1.00      | 1.00 |
| 1383320_at   | lymphocyte protein tyrosine kinase (mapped)                                              | Lck                  | 313050        | 0.99             | 4.08                 | 9.8E-01               | 3.2E-04              | 1.00      | 1.00      | 1.00      | 1.00 |
| 1369387_at   | vav 1 oncogene                                                                           | Vav1                 | 25156         | 0.87             | 4.07                 | 7.8E-01               | 9.8E-04              | 1.00      | 0.00      | 1.00      | 0.50 |
| 1368605_at   | adaptor protein with pleckstrin homology and src homology 2 domains                      | Aps                  | 114203        | 0.86             | 4.07                 | 8.2E-01               | 1.6E-03              | 0.00      | 0.25      | 1.00      | 0.50 |
| 1391946_at   | selectin, platelet                                                                       | Selp                 | 25651         | 0.50             | 4.07                 | 5.3E-01               | 2.8E-03              | 0.00      | 0.00      | 1.00      | 0.00 |

| Probe Set ID | Gene Title                                                                                                                   | Fold Change          |                  | False Discovery Rate |                      | Average Present Call |           |           |           |          |
|--------------|------------------------------------------------------------------------------------------------------------------------------|----------------------|------------------|----------------------|----------------------|----------------------|-----------|-----------|-----------|----------|
|              |                                                                                                                              | Strain Effect        | Rejection Effect | Native BN / DA       | Allograft / Isograft | Native BN            | Native DA | Allograft | Isograft  |          |
|              |                                                                                                                              | Entrez Gene ID       | Native BN / DA   | Allograft / Isograft | Native BN / DA       | Allograft / Isograft | Native BN | Native DA | Allograft | Isograft |
| 1368270_at   | apolipoprotein B editing complex 1                                                                                           | Apohec1              | 25383            | 4.06                 | 4.8E-01              | 4.7E-03              | 0.00      | 0.00      | 1.00      | 0.50     |
| 1370340_x_at | tropomyosin 3, gamma                                                                                                         | Tpm3                 | 117557           | 1.36                 | 4.04                 | 3.7E-01              | 3.2E-03   | 0.00      | 0.00      | 1.00     |
| 1387982_at   | toll-like receptor 4                                                                                                         | Tlr4                 | 29260            | 0.89                 | 4.03                 | 8.2E-01              | 5.6E-03   | 0.60      | 0.88      | 1.00     |
| 1374518_at   | transmembrane protein 77                                                                                                     | Tmem77               | 362011           | 1.20                 | 4.03                 | 2.5E-01              | 4.3E-04   | 1.00      | 1.00      | 1.00     |
| 1389732_at   | Similar to CG4025-PA                                                                                                         | LOC679937            | 679937           | 0.97                 | 4.02                 | 9.2E-01              | 6.5E-04   | 1.00      | 1.00      | 1.00     |
| 1374033_at   | proteasome (prosome, macropain) subunit, beta type 10                                                                        | Psmh10               | 291983           | 0.84                 | 4.02                 | 6.6E-01              | 3.6E-03   | 1.00      | 1.00      | 1.00     |
| 1368811_at   | lamin B1                                                                                                                     | Lmb1                 | 116685           | 0.70                 | 4.00                 | 8.1E-01              | 4.2E-04   | 0.00      | 0.00      | 1.00     |
| 1371040_at   | solute carrier family 1 (neutral amino acid transporter), member 5                                                           | Slc1a5               | 292657           | 0.72                 | 4.00                 | 8.3E-01              | 5.3E-04   | 0.00      | 0.00      | 1.00     |
| 1387739_at   | CD8 antigen, beta chain                                                                                                      | Cd8b                 | 24931            | 0.49                 | 3.98                 | 6.0E-01              | 2.7E-03   | 0.00      | 0.00      | 1.00     |
| 1371194_at   | tumor necrosis factor alpha induced protein 6                                                                                | Tnfaip6              | 84397            | 1.73                 | 3.97                 | 5.4E-01              | 6.1E-02   | 0.00      | 0.00      | 1.00     |
| 1398523_a_at | interferon (alpha and beta) receptor 1 (predicted)                                                                           | Ifnar1_predicted     | 288264           | 0.93                 | 3.97                 | 9.2E-01              | 1.2E-04   | 0.60      | 0.50      | 1.00     |
| 1371970_at   | similar to expressed sequence AW413625 (predicted)                                                                           | RGD1560913_predicted | 499322           | 1.20                 | 3.96                 | 8.8E-01              | 3.0E-04   | 0.00      | 0.00      | 1.00     |
| 1387221_at   | GTP cyclohydrolase 1                                                                                                         | Gch                  | 29244            | 1.03                 | 3.94                 | 9.5E-01              | 1.3E-02   | 0.00      | 0.25      | 1.00     |
| 1368809_at   | CAP, adenylate cyclase-associated protein 1 (yeast)                                                                          | Cap1                 | 64185            | 0.86                 | 3.94                 | 5.9E-01              | 2.5E-04   | 1.00      | 1.00      | 1.00     |
| 1373250_at   | similar to Anillin (predicted)                                                                                               | RGD1566097_predicted | 307056           | 0.87                 | 3.94                 | 9.5E-01              | 1.4E-02   | 0.00      | 0.00      | 1.00     |
| 1371932_at   | similar to hypothetical protein FLJ38482                                                                                     | RGD1309341           | 361137           | 0.82                 | 3.93                 | 4.6E-01              | 5.7E-04   | 0.00      | 0.00      | 1.00     |
| 1373494_at   | breakpoint cluster region (predicted)                                                                                        | Bcr_predicted        | 309696           | 1.69                 | 3.89                 | 7.7E-01              | 8.8E-02   | 0.00      | 0.00      | 1.00     |
| 1373613_at   | similar to RIKEN cDNA 4930570C03                                                                                             | LOC300191            | 300191           | 1.00                 | 3.89                 | 9.9E-01              | 2.0E-04   | 1.00      | 1.00      | 1.00     |
| 1387432_at   | ROD1 regulator of differentiation 1 (S. pombe)                                                                               | Rod1                 | 83515            | 1.32                 | 3.88                 | 8.7E-01              | 5.5E-02   | 0.00      | 0.00      | 1.00     |
| 1377116_at   | Cation channel, sperm associated 3 (predicted)                                                                               | Catsper3_predicted   | 290989           | 1.01                 | 3.86                 | 9.7E-01              | 6.0E-04   | 1.00      | 1.00      | 1.00     |
| 1374388_at   | EF hand domain containing 2                                                                                                  | Efh2                 | 298609           | 1.28                 | 3.86                 | 4.1E-01              | 1.4E-04   | 1.00      | 1.00      | 1.00     |
| 1374392_at   | protein tyrosine phosphatase-like (proline instead of catalytic arginine), member b (predicted)                              | Ptplb_predicted      | 288058           | 1.40                 | 3.85                 | 7.8E-01              | 1.4E-04   | 0.40      | 0.00      | 1.00     |
| 1390348_at   | folate receptor 2 (fetal) (predicted)                                                                                        | Folr2_predicted      | 293154           | 1.07                 | 3.85                 | 8.0E-01              | 4.6E-04   | 0.00      | 0.00      | 1.00     |
| 1373818_at   | Potassium channel tetramerisation domain containing 12 (predicted)                                                           | Kctd12_predicted     | 364548           | 1.22                 | 3.84                 | 5.4E-01              | 2.6E-04   | 1.00      | 1.00      | 1.00     |
| 1399148_s_at | glycosyltransferase 25 domain containing 1 (predicted)                                                                       | Gl25d1_predicted     | 290637           | 1.35                 | 3.84                 | 8.4E-01              | 5.6E-02   | 0.00      | 0.00      | 1.00     |
| 1387074_at   | regulator of G-protein signaling 2                                                                                           | Rgs2                 | 84583            | 1.86                 | 3.82                 | 5.3E-02              | 3.5E-04   | 1.00      | 1.00      | 1.00     |
| 1371123_x_at | RT1 class Ib, locus S3                                                                                                       | RT1-S3               | 294228           | 1.76                 | 3.81                 | 1.5E-01              | 2.5E-03   | 1.00      | 1.00      | 1.00     |
| 1373514_at   | similar to chromosome 17 open reading frame 27                                                                               | LOC688296            | 688296           | 0.93                 | 3.80                 | 9.3E-01              | 4.0E-03   | 0.00      | 0.00      | 1.00     |
| 1390510_at   | membrane-spanning 4-domains, subfamily A, member 6B                                                                          | Ms4a6b               | 293749           | 0.97                 | 3.80                 | 9.5E-01              | 7.7E-04   | 1.00      | 1.00      | 1.00     |
| 1388282_s_at | killer cell lectin-like receptor, subfamily A, member 5                                                                      | Klra5                | 297666           | 2.73                 | 3.80                 | 3.6E-01              | 9.9E-03   | 0.00      | 0.00      | 1.00     |
| 1388667_at   | mannosidase 2, alpha 1                                                                                                       | Man2a1               | 25478            | 1.98                 | 3.79                 | 5.5E-01              | 1.7E-03   | 0.00      | 0.00      | 1.00     |
| 1373897_at   | Ubiquitin carboxyl-terminal hydrolase L5                                                                                     | UchL5                | 360853           | 1.03                 | 3.79                 | 9.8E-01              | 2.8E-04   | 0.00      | 0.88      | 1.00     |
| 1376795_at   | Phosphoinositide-3-kinase adaptor protein 1 (predicted)                                                                      | Plk3ap1_predicted    | 294048           | 1.66                 | 3.79                 | 2.9E-01              | 1.6E-04   | 1.00      | 0.00      | 1.00     |
| 1372070_at   | interferon gamma inducible protein 30                                                                                        | Ifl30                | 290644           | 1.13                 | 3.79                 | 5.6E-01              | 9.2E-04   | 1.00      | 1.00      | 1.00     |
| 1388213_a_at | RT1 class Ib, locus S3                                                                                                       | RT1-S3               | 294228           | 1.81                 | 3.78                 | 2.9E-01              | 5.3E-03   | 1.00      | 1.00      | 1.00     |
| 1389244_x_at | chemokine (C-X-C motif) receptor 4                                                                                           | Cxcr4                | 60628            | 1.18                 | 3.77                 | 5.7E-01              | 7.9E-04   | 1.00      | 1.00      | 1.00     |
| 1387947_at   | v-maf musculoaponeurotic fibrosarcoma oncogene family, protein B (avian)                                                     | Matb                 | 54264            | 0.63                 | 3.77                 | 6.7E-01              | 5.8E-03   | 0.00      | 0.00      | 1.00     |
| 1374678_at   | sema domain, immunoglobulin domain (Ig), transmembrane domain (TM) and short cytoplasmic domain, (semaphorin) 4B             | Sema4b               | 293042           | 2.06                 | 3.76                 | 5.9E-01              | 1.1E-02   | 0.00      | 0.70      | 0.25     |
| 1372889_at   | Transcribed locus                                                                                                            |                      |                  | 1.84                 | 3.76                 | 4.2E-01              | 5.7E-03   | 0.00      | 0.00      | 0.50     |
| 1373658_at   | Rac GTPase-activating protein 1 (predicted)                                                                                  | Racgap1_predicted    | 315298           | 1.49                 | 3.75                 | 6.2E-01              | 1.0E-03   | 0.20      | 0.00      | 0.63     |
| 1373026_at   | spindle pole body component 24 homolog (S. cerevisiae) (predicted)                                                           | Spbc24_predicted     | 363028           | 0.49                 | 3.75                 | 6.4E-01              | 1.1E-03   | 0.00      | 0.00      | 0.80     |
| 1372893_at   | Yip1 domain family, member 1                                                                                                 | Yip1                 | 298312           | 1.16                 | 3.74                 | 6.8E-01              | 1.5E-04   | 1.00      | 0.75      | 1.00     |
| 1368655_at   | proteoglycan peptide core protein                                                                                            | Pgsg                 | 56782            | 0.99                 | 3.74                 | 9.9E-01              | 3.5E-04   | 1.00      | 1.00      | 1.00     |
| 1381968_at   | Sema domain, transmembrane domain (TM), and cytoplasmic domain, (semaphorin) 6D (predicted)                                  | Sema6d_predicted     | 311384           | 0.95                 | 3.72                 | 8.4E-01              | 8.1E-04   | 1.00      | 1.00      | 1.00     |
| 1373992_at   | similar to interferon-inducible GTPase                                                                                       | MGC108823            | 307414           | 1.07                 | 3.72                 | 9.2E-01              | 3.0E-03   | 1.00      | 1.00      | 1.00     |
| 1376109_at   | Transcribed locus                                                                                                            |                      |                  | 1.19                 | 3.71                 | 6.0E-01              | 1.3E-03   | 1.00      | 1.00      | 1.00     |
| 1367721_at   | syndecan 4                                                                                                                   | Sdc4                 | 24771            | 1.00                 | 3.71                 | 1.0E+00              | 1.6E-04   | 0.50      | 0.00      | 1.00     |
| 1389227_at   | Ras homolog gene family, member G                                                                                            | Rhog                 | 308875           | 1.17                 | 3.71                 | 5.2E-01              | 1.7E-04   | 1.00      | 1.00      | 1.00     |
| 1373685_at   | similar to low density lipoprotein receptor-related protein binding protein (predicted)                                      | RGD1565715_predicted | 361149           | 0.67                 | 3.71                 | 6.9E-01              | 1.7E-03   | 0.00      | 0.00      | 0.80     |
| 1372043_at   | similar to ribosomal protein P0-like protein; 60S acidic ribosomal protein PO; ribosomal protein, large, P0-like (predicted) | RGD1311709_predicted | 298586           | 1.13                 | 3.70                 | 9.3E-01              | 2.0E-03   | 0.20      | 0.00      | 1.00     |
| 1374799_at   | similar to mKIAA0159 protein (predicted)                                                                                     | RGD1562596_predicted | 362438           | 0.82                 | 3.68                 | 6.2E-01              | 4.3E-02   | 0.20      | 0.00      | 1.00     |
| 1387087_at   | CCAAT/enhancer binding protein (C/EBP), beta                                                                                 | Cebpb                | 24253            | 1.08                 | 3.68                 | 8.5E-01              | 7.4E-04   | 1.00      | 1.00      | 1.00     |
| 1368430_at   | legumain                                                                                                                     | Lgmn                 | 63865            | 1.21                 | 3.68                 | 3.6E-01              | 2.1E-04   | 1.00      | 1.00      | 1.00     |
| 1376728_at   | Hypothetical RNA binding protein RGD1359713                                                                                  | RGD1359713           | 305340           | 0.88                 | 3.68                 | 6.9E-01              | 5.7E-04   | 0.40      | 0.13      | 1.00     |
| 1375422_at   |                                                                                                                              |                      |                  | 1.81                 | 3.67                 | 3.3E-01              | 3.9E-03   | 1.00      | 1.00      | 1.00     |
| 1390022_at   | actin related protein 2/3 complex, subunit 5                                                                                 | Arpc5                | 360854           | 1.25                 | 3.67                 | 2.1E-01              | 4.4E-04   | 1.00      | 1.00      | 1.00     |
| 1371248_at   | similar to Cornifin A (Small proline-rich protein 1A) (SPR1A) (SPRR1)                                                        | LOC499660            | 499660           | 1.86                 | 3.66                 | 4.1E-01              | 5.8E-02   | 0.00      | 0.00      | 0.50     |
| 1386870_at   | glutamate-ammonia ligase (glutamine synthase)                                                                                | GluI                 | 24957            | 1.15                 | 3.65                 | 6.4E-01              | 2.0E-04   | 1.00      | 1.00      | 1.00     |
| 1369792_a_at | melanoma cell adhesion molecule                                                                                              | Mcam                 | 78967            | 1.59                 | 3.65                 | 3.1E-01              | 3.0E-03   | 1.00      | 0.63      | 1.00     |
| 1373949_at   | ATPase type 13A2 (predicted)                                                                                                 | Atp13a2_predicted    | 362645           | 1.07                 | 3.63                 | 8.4E-01              | 2.9E-03   | 0.00      | 0.00      | 1.00     |
| 1376850_a_at | chemokine (C-C motif) ligand 27 (predicted)                                                                                  | Ccl27_predicted      | 362505           | 1.22                 | 3.63                 | 8.3E-01              | 1.6E-02   | 0.00      | 0.00      | 1.00     |
| 1371402_at   | ATPase, H transporting, lysosomal V1 subunit B2                                                                              | Atp6v1b2             | 117596           | 1.02                 | 3.63                 | 9.5E-01              | 3.1E-04   | 1.00      | 1.00      | 1.00     |
| 1373554_at   | splA/ryanodine receptor domain and SOCS box containing 1 (predicted)                                                         | Spsb1_predicted      | 313722           | 0.94                 | 3.63                 | 9.7E-01              | 2.5E-04   | 0.00      | 0.00      | 1.00     |
| 1387135_at   | a disintegrin and metalloproteinase domain 15 (metargidin)                                                                   | Adam15               | 57025            | 0.97                 | 3.62                 | 9.2E-01              | 1.2E-04   | 1.00      | 1.00      | 1.00     |
| 1389525_at   | ring finger protein 149                                                                                                      | Rnf149               | 363222           | 0.95                 | 3.62                 | 8.6E-01              | 1.5E-04   | 1.00      | 1.00      | 1.00     |
| 1374529_at   | Thrombospondin 1                                                                                                             | Tbs1                 | 445442           | 1.31                 | 3.62                 | 7.3E-01              | 3.3E-03   | 1.00      | 1.00      | 1.00     |
| 1389668_at   | spindle pole body component 25 homolog (S. cerevisiae)                                                                       | Spbc25               | 295661           | 1.00                 | 3.62                 | 1.0E+00              | 1.4E-03   | 0.00      | 0.50      | 1.00     |
| 1370530_a_at | phospholipase D1                                                                                                             | Pld1                 | 25096            | 1.19                 | 3.62                 | 7.6E-01              | 4.6E-04   | 0.40      | 0.50      | 1.00     |
| 1384934_at   | Clone GDY20 unknown mRNA                                                                                                     |                      |                  | 0.91                 | 3.62                 | 7.3E-01              | 1.5E-03   | 0.00      | 0.25      | 1.00     |
| 1368754_at   | pyrimidinergic receptor P2Y, G-protein coupled, 6                                                                            | P2ry6                | 117264           | 0.98                 | 3.60                 | 9.4E-01              | 2.6E-03   | 0.50      | 0.00      | 0.75     |
| 1370073_at   | Dual (Hsp40) homolog, subfamily C, member 3                                                                                  | Dnajc3               | 63880            | 0.92                 | 3.60                 | 8.5E-01              | 1.6E-03   | 1.00      | 1.00      | 1.00     |
| 1369562_at   | hippocalcin-like 1                                                                                                           | Hpcal1               | 50871            | 1.89                 | 3.60                 | 3.6E-01              | 7.1E-03   | 0.20      | 0.00      | 1.00     |
| 1368976_at   | CD38 antigen                                                                                                                 | Cd38                 | 25668            | 0.99                 | 3.60                 | 9.7E-01              | 5.3E-03   | 1.00      | 0.50      | 1.00     |
| 1368045_at   | solute carrier family 31 (copper transporters), member 1                                                                     | Slc31a1              | 171135           | 1.43                 | 3.59                 | 6.9E-01              | 4.5E-03   | 0.00      | 0.00      | 0.60     |
| 1373262_at   | similar to 2310014H01Rik protein (predicted)                                                                                 | RGD1309543_predicted | 361790           | 1.07                 | 3.59                 | 9.2E-01              | 4.8E-04   | 0.00      | 0.00      | 1.00     |
| 1377002_at   | Interferon (alpha and beta) receptor 1 (predicted)                                                                           | Ifnar1_predicted     | 288264           | 0.91                 | 3.59                 | 8.1E-01              | 1.6E-03   | 0.00      | 0.00      | 1.00     |
| 1368647_at   | G protein-coupled receptor kinase 6                                                                                          | Gprk6                | 59076            | 1.13                 | 3.58                 | 9.4E-01              | 3.7E-03   | 0.00      | 0.00      | 1.00     |

| Probe Set ID | Gene Title                                                                                               | Gene Symbol          | Entrez Gene ID | Fold Change    |                     | False Discovery Rate |                     | Average Present Call |           |           |         |
|--------------|----------------------------------------------------------------------------------------------------------|----------------------|----------------|----------------|---------------------|----------------------|---------------------|----------------------|-----------|-----------|---------|
|              |                                                                                                          |                      |                | Native BN / DA | Allograft / Isoraft | Native BN / DA       | Allograft / Isoraft | Native BN            | Native DA | Allograft | Isoraft |
| 1388762_at   | IQ motif containing GTPase activating protein 1 (predicted)                                              | Iqgap1_predicted     | 361598         | 1.05           | 3.58                | 8.0E-01              | 2.0E-04             | 1.00                 | 1.00      | 1.00      | 1.00    |
| 1377172_at   | similar to Pins (predicted)                                                                              | RGD1560967_predicted | 362021         | 1.28           | 3.58                | 8.4E-01              | 8.3E-02             | 0.00                 | 0.00      | 0.70      | 0.00    |
| 1392407_at   | similar to RIKEN cDNA 6030405P05 gene (predicted)                                                        | RGD1561419_predicted | 498282         | 1.01           | 3.57                | 9.9E-01              | 1.5E-03             | 0.80                 | 0.25      | 1.00      | 1.00    |
| 1373881_at   | Rho, GDP dissociation inhibitor (GDI) beta                                                               | Arhgdib              | 362456         | 0.87           | 3.56                | 5.0E-01              | 1.4E-04             | 1.00                 | 1.00      | 1.00      | 1.00    |
| 1368555_at   | CD37 antigen                                                                                             | Cd37                 | 29185          | 1.15           | 3.56                | 8.1E-01              | 3.8E-03             | 0.10                 | 0.00      | 1.00      | 0.75    |
| 1368186_a_at | spleen tyrosine kinase                                                                                   | Syk                  | 25155          | 1.50           | 3.56                | 3.0E-01              | 1.8E-04             | 0.00                 | 0.00      | 1.00      | 0.50    |
| 1385903_at   | Zinc finger, SWIM domain containing 6                                                                    | Zswim6               | 310062         | 0.71           | 3.56                | 7.8E-01              | 5.7E-04             | 0.00                 | 0.00      | 0.50      | 0.00    |
| 1373657_at   | solute carrier family 31, member 2                                                                       | Slc31a2              | 298091         | 1.05           | 3.55                | 9.2E-01              | 1.5E-03             | 1.00                 | 1.00      | 1.00      | 1.00    |
| 1377759_at   | Transcribed locus                                                                                        |                      |                | 0.94           | 3.54                | 8.8E-01              | 3.4E-04             | 1.00                 | 0.63      | 1.00      | 1.00    |
| 1368683_at   | oxidized low density lipoprotein (lectin-like) receptor 1                                                | Oxidrl1              | 140914         | 0.64           | 3.54                | 7.1E-01              | 7.0E-03             | 0.00                 | 0.00      | 1.00      | 0.25    |
| 1373672_at   | Biotinidase                                                                                              | Bid                  | 306262         | 0.97           | 3.54                | 9.5E-01              | 9.2E-04             | 0.80                 | 1.00      | 1.00      | 1.00    |
| 1368878_at   | isopentenyl-diphosphate delta isomerase                                                                  | Idi1                 | 89784          | 1.54           | 3.52                | 2.5E-01              | 1.1E-03             | 1.00                 | 0.75      | 1.00      | 0.75    |
| 1387198_at   | inositol polyphosphate-5-phosphatase D                                                                   | Inpp5d               | 54259          | 1.02           | 3.50                | 9.6E-01              | 1.1E-02             | 1.00                 | 1.00      | 1.00      | 1.00    |
| 1399050_at   | adenylosuccinate synthetase, non muscle (predicted)                                                      | Adss_predicted       | 289276         | 0.95           | 3.50                | 8.6E-01              | 2.0E-04             | 1.00                 | 1.00      | 1.00      | 1.00    |
| 1373224_at   | ST3 beta-galactoside alpha-2,3-sialyltransferase 4                                                       | St3gal4              | 363040         | 1.72           | 3.49                | 5.3E-01              | 2.2E-03             | 0.00                 | 0.00      | 1.00      | 0.00    |
| 1375857_at   | similar to Myoferlin (Fer-1 like protein 3) (predicted)                                                  | RGD1564216_predicted | 309499         | 1.56           | 3.49                | 6.4E-01              | 7.9E-04             | 0.00                 | 0.00      | 1.00      | 0.50    |
| 1370516_at   | solute carrier family 15, member 3                                                                       | Slc15a3              | 246239         | 0.76           | 3.48                | 2.7E-01              | 1.2E-03             | 1.00                 | 1.00      | 1.00      | 1.00    |
| 1374468_at   | myeloid differentiation primary response gene 88                                                         | Myd88                | 301059         | 1.09           | 3.48                | 8.6E-01              | 1.8E-04             | 1.00                 | 1.00      | 1.00      | 1.00    |
| 1372032_at   | Transcribed locus                                                                                        |                      |                | 0.80           | 3.48                | 6.9E-01              | 2.9E-03             | 1.00                 | 1.00      | 1.00      | 1.00    |
| 1389496_at   | A kinase (PRKA) anchor protein 7                                                                         | Akap7                | 361458         | 0.82           | 3.47                | 2.7E-01              | 6.5E-04             | 1.00                 | 1.00      | 1.00      | 1.00    |
| 1388482_at   | similar to RIKEN cDNA 9130404D14                                                                         | RGD1307018           | 362115         | 1.12           | 3.47                | 8.4E-01              | 1.6E-04             | 1.00                 | 1.00      | 1.00      | 1.00    |
| 1370043_at   | activated leukocyte cell adhesion molecule                                                               | Alcam                | 79559          | 1.00           | 3.46                | 1.0E+00              | 1.0E-03             | 1.00                 | 1.00      | 1.00      | 1.00    |
| 1370365_at   | glutathione synthetase                                                                                   | Gss                  | 25458          | 1.17           | 3.45                | 8.7E-01              | 1.3E-02             | 0.00                 | 0.00      | 1.00      | 0.00    |
| 1372097_at   | Transcribed locus, strongly similar to NP_543171.1 apoptotic inhibitory molecule [Rattus norvegicus]     |                      |                | 1.27           | 3.45                | 6.3E-01              | 1.5E-03             | 1.00                 | 0.38      | 1.00      | 1.00    |
| 1369268_at   | activating transcription factor 3                                                                        | Atf3                 | 25389          | 1.04           | 3.44                | 9.8E-01              | 1.2E-02             | 0.00                 | 0.00      | 1.00      | 0.75    |
| 1377092_at   | Transcribed locus                                                                                        |                      |                | 1.68           | 3.44                | 3.1E-01              | 1.4E-03             | 1.00                 | 1.00      | 1.00      | 1.00    |
| 1370348_at   | ninjurin 1                                                                                               | Ninj1                | 25338          | 0.94           | 3.43                | 8.3E-01              | 1.9E-04             | 1.00                 | 1.00      | 1.00      | 1.00    |
| 1371539_at   | nucleolar protein family A, member 2 (predicted)                                                         | Nola2_predicted      | 287273         | 1.16           | 3.43                | 7.4E-01              | 9.6E-04             | 1.00                 | 1.00      | 1.00      | 1.00    |
| 1370347_at   | PDZ and LIM domain 7                                                                                     | Pdlim7               | 286908         | 0.99           | 3.43                | 9.9E-01              | 1.1E-03             | 0.30                 | 0.00      | 1.00      | 1.00    |
| 1389756_at   | maternal embryonic leucine zipper kinase (predicted)                                                     | Melk_predicted       | 362510         | 1.20           | 3.43                | 7.5E-01              | 3.7E-03             | 0.00                 | 0.13      | 1.00      | 0.50    |
| 1368066_at   | BCL2-antagonist/killer 1                                                                                 | Bak1                 | 116502         | 0.67           | 3.40                | 4.6E-01              | 1.5E-03             | 0.20                 | 0.25      | 1.00      | 0.75    |
| 1368762_at   | ubiquitin D                                                                                              | Ubd                  | 29168          | 0.62           | 3.40                | 2.8E-01              | 3.6E-02             | 0.30                 | 0.50      | 1.00      | 1.00    |
| 1374556_at   | spermine oxidase (predicted)                                                                             | Smox_predicted       | 308652         | 0.77           | 3.40                | 3.3E-01              | 5.3E-04             | 1.00                 | 1.00      | 1.00      | 1.00    |
| 1391880_at   | tumor protein D52 (predicted)                                                                            | Tpd52_predicted      | 294900         | 1.35           | 3.40                | 4.6E-01              | 2.4E-04             | 1.00                 | 1.00      | 1.00      | 1.00    |
| 1367973_at   | chemokine (C-C motif) ligand 2                                                                           | Ccl2                 | 24770          | 0.80           | 3.39                | 6.2E-01              | 7.4E-04             | 0.10                 | 0.00      | 1.00      | 1.00    |
| 1388182_at   | DNA primase, p49 subunit                                                                                 | Prim1                | 246327         | 1.34           | 3.37                | 5.1E-01              | 5.2E-04             | 0.40                 | 0.00      | 1.00      | 1.00    |
| 1369940_at   | transaldolase 1                                                                                          | Taldo1               | 83688          | 1.15           | 3.37                | 6.5E-01              | 2.9E-03             | 1.00                 | 0.75      | 1.00      | 1.00    |
| 1376481_at   | A disintegrin-like and metalloprotease (reprolysin type) with thrombospondin type 1 motif, 9 (predicted) | Adams9_predicted     | 312566         | 1.76           | 3.37                | 7.4E-01              | 2.2E-03             | 0.00                 | 0.00      | 1.00      | 0.00    |
| 1371977_at   | actin related protein 2/3 complex, subunit 3 (predicted)                                                 | Arcp3_predicted      | 288669         | 0.98           | 3.36                | 9.6E-01              | 1.9E-04             | 1.00                 | 1.00      | 1.00      | 1.00    |
| 1373959_at   | protein phosphatase 2 (formerly 2A), regulatory subunit A (PR 65), beta isoform                          | Ppp2r1b              | 315648         | 2.12           | 3.36                | 3.5E-01              | 7.6E-04             | 0.00                 | 0.00      | 1.00      | 0.00    |
| 1376636_at   | transforming growth factor, beta receptor 1                                                              | Tgfbri               | 29591          | 1.21           | 3.35                | 6.3E-01              | 9.9E-04             | 1.00                 | 0.88      | 1.00      | 1.00    |
| 1373138_at   | nudix (nucleoside diphosphate linked moiety X)-type motif 5                                              | Nudt5                | 361274         | 2.09           | 3.34                | 2.7E-01              | 1.9E-04             | 0.00                 | 0.00      | 1.00      | 0.50    |
| 1376693_at   | similar to OEF2 (predicted)                                                                              | RGD1563091_predicted | 500011         | 1.07           | 3.34                | 8.8E-01              | 7.5E-03             | 1.00                 | 0.50      | 1.00      | 1.00    |
| 1394316_a_at | tetraspanin 5                                                                                            | Tspan5               | 362048         | 0.72           | 3.34                | 7.7E-01              | 3.0E-02             | 0.00                 | 0.00      | 1.00      | 0.00    |
| 1369456_at   | 5-hydroxytryptamine (serotonin) receptor 2B                                                              | Htr2b                | 29581          | 1.54           | 3.34                | 6.6E-01              | 4.0E-03             | 0.60                 | 0.25      | 1.00      | 0.75    |
| 1373869_at   | sterol O-acyltransferase 1                                                                               | Soa1                 | 81782          | 1.44           | 3.33                | 4.3E-01              | 1.2E-03             | 0.00                 | 0.00      | 1.00      | 0.25    |
| 1374626_at   | leucine-rich alpha-2-glycoprotein 1                                                                      | Lrg1                 | 367455         | 1.18           | 3.33                | 5.8E-01              | 9.9E-04             | 1.00                 | 0.25      | 1.00      | 0.75    |
| 1373592_at   | similar to SPI6                                                                                          | MGC94010             | 361241         | 1.21           | 3.33                | 5.0E-01              | 1.8E-03             | 0.80                 | 1.00      | 1.00      | 1.00    |
| 1398349_at   | adenylate kinase 2                                                                                       | Ak2                  | 24184          | 0.69           | 3.32                | 2.5E-01              | 2.8E-04             | 1.00                 | 1.00      | 1.00      | 1.00    |
| 1376637_at   | Transcribed locus                                                                                        |                      |                | 1.07           | 3.32                | 9.7E-01              | 9.7E-02             | 0.00                 | 0.25      | 0.80      | 0.00    |
| 1375170_at   | S100 calcium binding protein A11 (calizzarin)                                                            | S100a11              | 445415         | 1.12           | 3.31                | 7.0E-01              | 3.7E-04             | 1.00                 | 1.00      | 1.00      | 1.00    |
| 1367712_at   | tissue inhibitor of metalloproteinase 1                                                                  | Timp1                | 116510         | 1.37           | 3.31                | 5.7E-01              | 2.6E-02             | 0.80                 | 0.63      | 1.00      | 1.00    |
| 1368914_at   | runt related transcription factor 1                                                                      | Runx1                | 50662          | 2.39           | 3.30                | 2.1E-01              | 3.3E-02             | 0.00                 | 0.00      | 0.80      | 0.25    |
| 1388071_x_at | RT1 class Ib, locus Aw2                                                                                  | RT1-Aw2              | 24737          | 1.65           | 3.29                | 1.9E-01              | 7.5E-04             | 1.00                 | 1.00      | 1.00      | 1.00    |
| 1371537_at   | Transcribed locus                                                                                        |                      |                | 1.15           | 3.29                | 7.6E-01              | 7.9E-04             | 0.90                 | 1.00      | 1.00      | 1.00    |
| 1374578_at   | Transcribed locus                                                                                        |                      |                | 1.24           | 3.29                | 3.3E-01              | 4.2E-04             | 0.80                 | 0.88      | 1.00      | 1.00    |
| 1374449_at   | Solute carrier family 35, member E1 (predicted)                                                          | Slc35e1_predicted    | 306328         | 0.85           | 3.28                | 5.9E-01              | 1.5E-03             | 0.60                 | 1.00      | 0.88      | 1.00    |
| 1373536_at   |                                                                                                          |                      |                | 0.90           | 3.28                | 8.4E-01              | 4.5E-04             | 1.00                 | 0.75      | 1.00      | 1.00    |
| 1368948_at   | moesin                                                                                                   | Msn                  | 81521          | 1.55           | 3.28                | 2.7E-01              | 3.2E-02             | 0.50                 | 0.25      | 1.00      | 0.50    |
| 1370294_a_at | cell division cycle 20 homolog (S. cerevisiae)                                                           | Cdc20                | 64515          | 0.86           | 3.28                | 7.8E-01              | 3.7E-04             | 0.00                 | 0.00      | 1.00      | 0.25    |
| 1389873_at   | PYD and CARD domain containing                                                                           | Pycard               | 282817         | 1.07           | 3.27                | 6.6E-01              | 1.9E-03             | 1.00                 | 1.00      | 1.00      | 1.00    |
| 1371922_at   | Transcribed locus                                                                                        |                      |                | 0.86           | 3.27                | 7.7E-01              | 3.1E-02             | 0.00                 | 0.88      | 1.00      | 0.13    |
| 1367914_at   | epithelial membrane protein 3                                                                            | Emp3                 | 81505          | 0.82           | 3.27                | 6.1E-01              | 1.8E-04             | 1.00                 | 1.00      | 1.00      | 1.00    |
| 1367936_at   | serine/threonine kinase 10                                                                               | Stk10                | 29398          | 1.22           | 3.27                | 5.2E-01              | 1.9E-03             | 1.00                 | 1.00      | 1.00      | 1.00    |
| 1371232_a_at | chondroitin sulfate proteoglycan 2                                                                       | Cspg2                | 114122         | 0.98           | 3.27                | 9.9E-01              | 3.7E-02             | 0.00                 | 0.00      | 1.00      | 0.50    |
| 1376842_at   | Transcribed locus                                                                                        |                      |                | 1.32           | 3.27                | 5.4E-01              | 2.0E-03             | 0.80                 | 0.25      | 1.00      | 0.50    |
| 1390391_at   | Transcribed locus                                                                                        |                      |                | 1.13           | 3.26                | 7.2E-01              | 1.1E-03             | 0.80                 | 1.00      | 1.00      | 1.00    |
| 1374458_at   | Transcribed locus, strongly similar to XP_001060531.1 similar to serum/glucocorticoid regulated kinase 3 |                      |                | 1.18           | 3.25                | 8.2E-01              | 6.6E-04             | 1.00                 | 1.00      | 1.00      | 1.00    |
| 1370972_x_at | RT1 class I, CE5                                                                                         | RT1-CE5              | 309607         | 0.71           | 3.25                | 3.6E-01              | 1.4E-02             | 0.00                 | 0.00      | 1.00      | 0.00    |
| 1389742_at   | Transcribed locus                                                                                        |                      |                | 1.22           | 3.25                | 8.2E-01              | 1.0E-02             | 0.20                 | 0.25      | 1.00      | 0.50    |
| 1367780_at   | pituitary tumor-transforming 1                                                                           | Pttg1                | 64193          | 0.99           | 3.24                | 9.9E-01              | 1.2E-03             | 0.00                 | 0.00      | 0.60      | 0.00    |
| 1372132_at   | CNDP dipeptidase 2 (metallopeptidase M20 family)                                                         | Cndp2                | 291394         | 1.12           | 3.23                | 6.7E-01              | 2.1E-04             | 1.00                 | 1.00      | 1.00      | 1.00    |
| 1374431_at   | similar to ATPase, H+ transporting, V1 subunit A, isoform 1                                              | LOC685232            | 685232         | 1.22           | 3.23                | 6.5E-01              | 4.7E-04             | 1.00                 | 1.00      | 1.00      | 1.00    |
| 1392819_at   | Transcribed locus                                                                                        |                      |                | 1.31           | 3.22                | 7.0E-01              | 1.2E-03             | 0.10                 | 0.00      | 1.00      | 0.63    |
| 1375696_at   | interferon (alpha and beta) receptor 1 (predicted)                                                       | Ifnar1_predicted     | 288264         | 1.22           | 3.21                | 7.5E-01              | 5.8E-03             | 1.00                 | 1.00      | 1.00      | 1.00    |
| 1388440_at   | anterior pharynx defective 1b homolog (C. elegans)                                                       | Aph1b                | 300802         | 0.88           | 3.21                | 4.2E-01              | 2.4E-04             | 1.00                 | 1.00      | 1.00      | 1.00    |
| 1388203_x_at | RT1 class Ib, locus Aw2                                                                                  | RT1-Aw2              | 24737          | 1.01           | 3.21                | 9.8E-01              | 2.7E-04             | 1.00                 | 1.00      | 1.00      | 1.00    |

| Probe Set ID | Gene Title                                                                                                       | Gene Symbol          | Fold Change   |                  | False Discovery Rate |                      | Average Present Call |           |           |          |      |      |
|--------------|------------------------------------------------------------------------------------------------------------------|----------------------|---------------|------------------|----------------------|----------------------|----------------------|-----------|-----------|----------|------|------|
|              |                                                                                                                  |                      | Strain Effect | Rejection Effect | Native BN / DA       | Allograft / Isograft | Native BN            | Native DA | Allograft | Isograft |      |      |
| 1370539_at   | RAB8B, member RAS oncogene family                                                                                | Rab8b                | 266688        | 1.67             | 3.21                 | 1.00                 | 1.5E-01              | 4.2E-03   | 1.00      | 1.00     | 1.00 | 1.00 |
| 1387946_at   | lectin, galactoside-binding, soluble, 3 binding protein                                                          | Lgals3bp             | 245955        | 0.91             | 3.20                 | 7.7E-01              | 5.0E-04              | 1.00      | 1.00      | 1.00     | 1.00 | 1.00 |
| 1370184_at   | cofilin 1, non-muscle                                                                                            | Cfl1                 | 29271         | 0.94             | 3.19                 | 9.1E-01              | 1.9E-03              | 1.00      | 1.00      | 1.00     | 1.00 | 1.00 |
| 1390386_at   | caspace 3, apoptosis related cysteine protease                                                                   | Casp3                | 25402         | 1.20             | 3.18                 | 9.2E-01              | 1.5E-03              | 0.00      | 0.00      | 1.00     | 0.00 | 0.00 |
| 1371644_at   | protein tyrosine kinase 9                                                                                        | Ptk9                 | 315265        | 0.62             | 3.17                 | 7.4E-01              | 1.7E-04              | 0.00      | 0.00      | 1.00     | 1.00 | 1.00 |
| 1369122_at   | Bcl2-associated X protein                                                                                        | Bax                  | 24887         | 0.99             | 3.17                 | 9.7E-01              | 2.8E-03              | 0.10      | 0.50      | 1.00     | 1.00 | 1.00 |
| 1376793_at   | similar to RIKEN cDNA 5730414C17 (predicted)                                                                     | RGD1308377_predicted | 306687        | 0.89             | 3.16                 | 6.2E-01              | 3.3E-04              | 1.00      | 1.00      | 1.00     | 1.00 | 1.00 |
| 1370082_at   | transforming growth factor, beta 1                                                                               | Tgfb1                | 59086         | 1.30             | 3.16                 | 5.8E-01              | 7.7E-04              | 0.00      | 0.00      | 1.00     | 0.00 | 0.00 |
| 1374565_at   | NIMA (never in mitosis gene a)-related expressed kinase 6                                                        | Nek6                 | 360161        | 1.17             | 3.16                 | 6.4E-01              | 6.8E-04              | 1.00      | 0.00      | 1.00     | 1.00 | 0.75 |
| 1372691_at   | uridine phosphorylase 1                                                                                          | Upp1                 | 289801        | 0.91             | 3.16                 | 8.3E-01              | 5.0E-04              | 1.00      | 1.00      | 1.00     | 1.00 | 1.00 |
| 1371618_s_at | tubulin, beta 3                                                                                                  | Tubb3                | 246118        | 0.99             | 3.15                 | 9.9E-01              | 7.3E-03              | 0.00      | 0.00      | 1.00     | 1.00 | 1.00 |
| 1373751_at   | Transcribed locus                                                                                                |                      |               | 1.49             | 3.15                 | 1.8E-01              | 4.4E-04              | 1.00      | 0.50      | 1.00     | 1.00 | 1.00 |
| 1375020_at   | Ras and Rab interactor 3 (predicted)                                                                             | Rin3_predicted       | 314397        | 1.21             | 3.14                 | 3.0E-01              | 2.6E-03              | 0.00      | 0.00      | 1.00     | 0.50 | 1.00 |
| 1374615_at   |                                                                                                                  |                      |               | 1.61             | 3.14                 | 4.9E-01              | 1.3E-02              | 0.60      | 0.50      | 1.00     | 1.00 | 1.00 |
| 1372513_at   | ras-related C3 botulinum toxin substrate 1                                                                       | Rac1                 | 363875        | 1.70             | 3.14                 | 7.3E-02              | 3.8E-03              | 1.00      | 1.00      | 1.00     | 1.00 | 1.00 |
| 1375420_at   | tumor protein p53 inducible protein 11 (predicted)                                                               | Tp53i11_predicted    | 311209        | 0.98             | 3.13                 | 9.7E-01              | 1.9E-04              | 0.40      | 0.13      | 1.00     | 0.88 | 1.00 |
| 1373198_at   | similar to RIKEN cDNA 2810451A06                                                                                 | RGD1311098           | 362998        | 1.46             | 3.13                 | 2.0E-01              | 2.5E-03              | 0.20      | 0.00      | 1.00     | 0.00 | 0.00 |
| 1383912_at   | similar to Protein C6orf115                                                                                      | LOC684848            | 684848        | 0.84             | 3.13                 | 3.1E-01              | 6.9E-03              | 1.00      | 1.00      | 1.00     | 1.00 | 1.00 |
| 1367745_at   | diacylglycerol kinase zeta                                                                                       | Dgkz                 | 81821         | 1.09             | 3.12                 | 8.4E-01              | 7.0E-03              | 0.20      | 0.00      | 1.00     | 0.00 | 0.00 |
| 1390563_at   | ATP-binding cassette, sub-family A (ABC1), member 3                                                              | Abcc3                | 302973        | 1.54             | 3.12                 | 6.2E-01              | 2.8E-03              | 0.00      | 0.00      | 1.00     | 1.00 | 1.00 |
| 1376722_at   | nucleoporin 205Da (predicted)                                                                                    | Nup205_predicted     | 362335        | 1.47             | 3.12                 | 3.3E-01              | 1.9E-04              | 0.90      | 0.00      | 1.00     | 1.00 | 1.00 |
| 1371368_at   | Sec61 alpha 1 subunit (S. cerevisiae)                                                                            | Sec61a1              | 80843         | 1.42             | 3.12                 | 4.9E-01              | 4.6E-04              | 0.70      | 0.25      | 1.00     | 1.00 | 1.00 |
| 1372156_at   | transmembrane protein 97                                                                                         | Tmem97               | 303330        | 1.11             | 3.12                 | 6.9E-01              | 5.7E-04              | 0.00      | 0.00      | 1.00     | 1.00 | 1.00 |
| 1370499_at   | killer cell lectin-like receptor subfamily B, member 1A (mapped)                                                 | Klrb1a               | 362443        | 0.86             | 3.12                 | 8.1E-01              | 6.6E-02              | 0.80      | 0.75      | 1.00     | 0.50 | 1.00 |
| 1387402_at   | myosin, heavy polypeptide 9, non-muscle                                                                          | Myh9                 | 25745         | 0.99             | 3.12                 | 9.9E-01              | 8.5E-02              | 0.00      | 0.75      | 1.00     | 0.60 | 0.00 |
| 1374912_at   | Alpha-2u globulin PGCL1                                                                                          | LOC259246            | 259246        | 0.92             | 3.12                 | 9.4E-01              | 4.9E-02              | 0.00      | 0.00      | 1.00     | 0.60 | 0.00 |
| 1370096_at   | perforin 1 (pore forming protein)                                                                                | Prfl                 | 50669         | 1.16             | 3.12                 | 9.4E-01              | 1.4E-03              | 0.00      | 0.00      | 1.00     | 0.60 | 0.00 |
| 1374933_at   | melanoma cell adhesion molecule                                                                                  | Mcam                 | 78967         | 1.84             | 3.12                 | 4.0E-01              | 1.3E-03              | 1.00      | 1.00      | 1.00     | 1.00 | 1.00 |
| 1372182_at   | phosphofruktokinase, platelet                                                                                    | Pfkp                 | 60416         | 1.17             | 3.11                 | 6.7E-01              | 5.7E-03              | 1.00      | 1.00      | 1.00     | 1.00 | 1.00 |
| 1370954_at   | procollagen-proline, 2-oxoglutarate 4-dioxygenase (proline 4-hydroxylase), alpha 1 polypeptide                   | P4ha1                | 64475         | 1.04             | 3.11                 | 9.3E-01              | 1.8E-04              | 1.00      | 1.00      | 1.00     | 1.00 | 1.00 |
| 1388857_at   | SEC23B (S. cerevisiae) (predicted)                                                                               | Sec23b_predicted     | 362226        | 1.34             | 3.11                 | 3.6E-01              | 6.5E-04              | 1.00      | 1.00      | 1.00     | 1.00 | 1.00 |
| 1386976_at   | CD82 antigen                                                                                                     | Cd82                 | 83628         | 1.10             | 3.11                 | 8.2E-01              | 1.4E-03              | 0.60      | 0.38      | 1.00     | 1.00 | 1.00 |
| 1368437_at   | carbonic anhydrase 4                                                                                             | Ca4                  | 29422         | 0.34             | 3.10                 | 2.2E-01              | 7.2E-03              | 0.00      | 0.00      | 0.90     | 0.00 | 0.00 |
| 1388745_at   | sema domain, immunoglobulin domain (Ig), transmembrane domain (TM) and short cytoplasmic domain, (semaphorin) 4A | Sema4a               | 310630        | 1.01             | 3.10                 | 9.7E-01              | 9.3E-04              | 1.00      | 0.75      | 1.00     | 1.00 | 1.00 |
| 1388913_at   | phosphatidic acid phosphatase type 2c                                                                            | Ppap2c               | 246115        | 1.24             | 3.10                 | 8.8E-01              | 7.2E-02              | 0.00      | 0.00      | 0.70     | 0.00 | 0.00 |
| 1375424_at   | ARP2 actin-related protein 2 homolog (yeast)                                                                     | Actr2                | 289820        | 1.25             | 3.10                 | 4.9E-01              | 1.3E-04              | 1.00      | 1.00      | 1.00     | 1.00 | 1.00 |
| 1367740_at   | creatine kinase, brain                                                                                           | Ckb                  | 24264         | 1.23             | 3.10                 | 5.3E-01              | 2.9E-03              | 1.00      | 1.00      | 1.00     | 1.00 | 1.00 |
| 1383906_at   | similar to lung inducible neuralized-related C3HC4 RING finger protein                                           | LOC316326            | 316326        | 1.63             | 3.09                 | 5.3E-01              | 5.2E-04              | 0.00      | 0.00      | 1.00     | 0.00 | 0.00 |
| 1380546_at   | similar to hypothetical protein FLJ10986                                                                         | LOC298250            | 298250        | 0.72             | 3.09                 | 4.1E-01              | 4.0E-03              | 1.00      | 1.00      | 1.00     | 1.00 | 1.00 |
| 1388600_at   | CDNA clone IMAGE:7320582                                                                                         |                      |               | 1.51             | 3.08                 | 3.3E-01              | 1.5E-03              | 1.00      | 0.88      | 1.00     | 1.00 | 1.00 |
| 1377353_a_at | tumor necrosis factor (ligand) superfamily, member 13                                                            | Tnfrsf13             | 287437        | 1.04             | 3.08                 | 8.5E-01              | 2.7E-03              | 0.20      | 0.13      | 1.00     | 0.75 | 1.00 |
| 1388347_at   | similar to lymphocyte antigen 6 complex, locus E                                                                 | LOC62934             | 362934        | 0.72             | 3.08                 | 2.8E-01              | 2.1E-03              | 1.00      | 1.00      | 1.00     | 1.00 | 1.00 |
| 1389380_at   | similar to Folylpolylglutamate synthase, mitochondrial precursor                                                 | LOC687266            | 687266        | 1.36             | 3.08                 | 7.3E-01              | 4.2E-03              | 0.00      | 0.00      | 1.00     | 0.00 | 0.00 |
| 1373043_at   | similar to stromal cell-derived factor 2-like 1                                                                  | LOC680945            | 680945        | 1.06             | 3.08                 | 9.0E-01              | 7.2E-04              | 1.00      | 1.00      | 1.00     | 1.00 | 1.00 |
| 1368305_at   | caspace 6                                                                                                        | Casp6                | 83584         | 1.39             | 3.07                 | 5.5E-01              | 4.7E-02              | 0.00      | 0.00      | 0.60     | 0.00 | 0.00 |
| 1370631_at   | regenerating islet-derived 3 gamma                                                                               | Reg3g                | 24620         | 4.48             | 3.07                 | 1.1E-01              | 6.5E-02              | 1.00      | 0.75      | 1.00     | 1.00 | 1.00 |
| 1376624_at   | Transcribed locus                                                                                                |                      |               | 1.02             | 3.07                 | 9.6E-01              | 3.6E-04              | 1.00      | 0.75      | 1.00     | 1.00 | 1.00 |
| 1377821_at   | Transcribed locus                                                                                                |                      |               | 0.92             | 3.07                 | 9.2E-01              | 4.4E-05              | 1.00      | 1.00      | 1.00     | 1.00 | 1.00 |
| 1388416_at   | low density lipoprotein receptor-related protein 1                                                               | Lrp1                 | 299858        | 2.73             | 3.07                 | 3.0E-01              | 3.4E-03              | 1.00      | 0.25      | 1.00     | 1.00 | 1.00 |
| 1373221_at   | diaphanous homolog 1 (Drosophila) (predicted)                                                                    | Diap1_predicted      | 307483        | 1.28             | 3.06                 | 6.3E-01              | 6.4E-04              | 1.00      | 0.75      | 1.00     | 1.00 | 1.00 |
| 1398892_at   | Niemann Pick type C2                                                                                             | Npc2                 | 286898        | 1.02             | 3.06                 | 9.7E-01              | 1.3E-03              | 1.00      | 1.00      | 1.00     | 1.00 | 1.00 |
| 1398319_at   | Nclone10 mRNA                                                                                                    |                      |               | 1.12             | 3.06                 | 7.8E-01              | 2.1E-03              | 1.00      | 0.88      | 1.00     | 1.00 | 1.00 |
| 1372770_at   |                                                                                                                  |                      |               | 1.55             | 3.05                 | 1.9E-01              | 5.3E-04              | 1.00      | 1.00      | 1.00     | 1.00 | 1.00 |
| 1398360_at   | similar to Elongation of very long chain fatty acids protein 1                                                   | LOC679532            | 679532        | 0.87             | 3.04                 | 7.4E-01              | 1.4E-04              | 1.00      | 1.00      | 1.00     | 1.00 | 1.00 |
| 1387871_at   | cofilin 1, non-muscle                                                                                            | Cfl1                 | 29271         | 0.92             | 3.04                 | 8.8E-01              | 2.5E-03              | 0.70      | 0.75      | 1.00     | 1.00 | 1.00 |
| 1374939_at   | cytoplasmic FMR1 interacting protein 2 (predicted)                                                               | Cyfp2_predicted      | 303073        | 0.80             | 3.04                 | 5.4E-01              | 5.2E-03              | 0.60      | 0.63      | 1.00     | 0.75 | 1.00 |
| 1373164_at   | Transcribed locus                                                                                                |                      |               | 1.10             | 3.04                 | 8.6E-01              | 3.3E-04              | 1.00      | 1.00      | 1.00     | 1.00 | 1.00 |
| 1370999_at   | sperm associated antigen 5                                                                                       | Spag5                | 252918        | 1.71             | 3.04                 | 5.5E-01              | 1.4E-02              | 0.00      | 0.00      | 0.50     | 0.00 | 0.00 |
| 1376697_at   | carbohydrate sulfotransferase 12                                                                                 | Cst12                | 304322        | 0.86             | 3.03                 | 8.3E-01              | 6.5E-04              | 0.00      | 0.00      | 1.00     | 0.00 | 0.00 |
| 1388393_at   | proteolipid protein 2 (mapped)                                                                                   | Plp2                 | 302562        | 1.14             | 3.03                 | 5.6E-01              | 1.8E-04              | 1.00      | 1.00      | 1.00     | 1.00 | 1.00 |
| 1377260_at   | Transcribed locus                                                                                                |                      |               | 0.74             | 3.03                 | 4.5E-01              | 8.6E-03              | 0.00      | 0.13      | 1.00     | 0.25 | 1.00 |
| 1371027_at   | Casitas B-lineage lymphoma b                                                                                     | Cblb                 | 171136        | 0.95             | 3.03                 | 9.1E-01              | 2.5E-03              | 1.00      | 1.00      | 1.00     | 1.00 | 1.00 |
| 1370822_at   | RT1 class II, locus Ba                                                                                           | RT1-Ba               | 309621        | 1.08             | 3.03                 | 9.3E-01              | 8.3E-03              | 0.00      | 0.00      | 1.00     | 1.00 | 1.00 |
| 1369262_at   | caspace 8                                                                                                        | Casp8                | 64044         | 0.90             | 3.02                 | 9.3E-01              | 3.6E-04              | 0.00      | 0.00      | 1.00     | 0.00 | 0.00 |
| 1374876_at   | leptin receptor overlapping transcript-like 1                                                                    | Leprotl1             | 361160        | 0.84             | 3.02                 | 4.8E-01              | 2.6E-03              | 0.90      | 0.88      | 1.00     | 1.00 | 1.00 |
| 1387195_at   | suppression of tumorigenicity 14 (colon carcinoma)                                                               | St14                 | 114093        | 1.05             | 3.02                 | 9.3E-01              | 1.4E-03              | 1.00      | 0.75      | 1.00     | 1.00 | 1.00 |
| 1370297_at   | polo-like kinase 1 (Drosophila)                                                                                  | Pkl1                 | 25515         | 1.04             | 3.02                 | 9.4E-01              | 3.2E-02              | 0.00      | 0.00      | 0.60     | 0.00 | 0.00 |
| 1376657_at   | immunoglobulin superfamily, member 4A                                                                            | Igsf4a               | 363058        | 0.61             | 3.02                 | 5.9E-01              | 2.4E-02              | 0.00      | 0.00      | 1.00     | 0.25 | 1.00 |
| 1372459_at   | vasodilator-stimulated phosphoprotein (predicted)                                                                | Vasp_predicted       | 361517        | 1.12             | 3.02                 | 7.2E-01              | 2.6E-04              | 1.00      | 1.00      | 1.00     | 1.00 | 1.00 |
| 1376317_at   | origin recognition complex, subunit 6-like (S. cerevisiae)                                                       | Orc6l                | 291927        | 0.89             | 3.02                 | 8.6E-01              | 1.3E-03              | 0.00      | 0.00      | 1.00     | 0.00 | 0.00 |
| 1370051_at   | transglutaminase 1                                                                                               | Tgm1                 | 60335         | 2.92             | 3.01                 | 3.3E-01              | 2.9E-02              | 0.00      | 0.00      | 0.70     | 0.00 | 0.00 |
| 1379598_at   | Transcribed locus                                                                                                |                      |               | 1.13             | 3.01                 | 9.4E-01              | 1.6E-03              | 0.00      | 0.00      | 1.00     | 0.75 | 1.00 |
| 1371936_at   | eukaryotic translation initiation factor 4A1                                                                     | Eif4a1               | 287436        | 0.98             | 3.01                 | 9.6E-01              | 2.4E-04              | 1.00      | 1.00      | 1.00     | 1.00 | 1.00 |
| 1388566_at   | LIM and SH3 protein 1                                                                                            | Lasp1                | 29278         | 1.18             | 3.01                 | 2.9E-01              | 3.8E-04              | 1.00      | 1.00      | 1.00     | 1.00 | 1.00 |
| 1373831_at   | hypothetical protein LOC619574                                                                                   | LOC619574            | 619574        | 0.85             | 3.01                 | 8.2E-01              | 4.4E-04              | 1.00      | 1.00      | 1.00     | 0.00 | 0.00 |
| 1388750_at   | transferrin receptor                                                                                             | Tfrc                 | 64678         | 0.59             | 3.00                 | 3.2E-01              | 2.1E-04              | 1.00      | 1.00      | 1.00     | 1.00 | 1.00 |
| 1388151_at   | coronin 7                                                                                                        | Coro7                | 192276        | 0.96             | 3.00                 | 9.3E-01              | 1.9E-04              | 0.40      | 0.13      | 1.00     | 1.00 | 0.75 |



| Probe Set ID | Gene Title                                                                                  | Gene Symbol          | Entrez Gene ID | Fold Change    |                       | False Discovery Rate |                       | Average Present Call |           |           |           |
|--------------|---------------------------------------------------------------------------------------------|----------------------|----------------|----------------|-----------------------|----------------------|-----------------------|----------------------|-----------|-----------|-----------|
|              |                                                                                             |                      |                | Strain Effect  | Rejection Effect      | Native BN / DA       | Allograft / Iso graft | Native BN            | Native DA | Allograft | Iso graft |
|              |                                                                                             |                      |                | Native BN / DA | Allograft / Iso graft | Native BN / DA       | Allograft / Iso graft | Native BN            | Native DA | Allograft | Iso graft |
| 1374320_at   | coagulation factor 5 (mapped)                                                               | F5                   | 304929         | 1.30           | 3.00                  | 3.4E-01              | 3.9E-04               | 1.00                 | 1.00      | 1.00      | 1.00      |
| 1367938_at   | UDP-glucose dehydrogenase                                                                   | Ugdh                 | 83472          | 1.27           | 3.00                  | 3.0E-01              | 9.5E-03               | 1.00                 | 1.00      | 1.00      | 1.00      |
| 1376169_at   | similar to PHD finger protein 20-like 1 isoform 1                                           | LOC314964            | 314964         | 1.02           | 0.33                  | 9.8E-01              | 5.5E-02               | 1.00                 | 1.00      | 0.70      | 1.00      |
| 1368252_at   | kelch repeat and BTB (POZ) domain containing 10                                             | Kbtd10               | 117537         | 1.21           | 0.33                  | 3.4E-01              | 4.3E-03               | 1.00                 | 1.00      | 1.00      | 1.00      |
| 1370918_a_at | ATP synthase, H+ transporting, mitochondrial F1 complex, gamma polypeptide 1                | Atp5c1               | 116550         | 0.89           | 0.33                  | 7.4E-01              | 5.0E-03               | 1.00                 | 1.00      | 1.00      | 1.00      |
| 1377054_at   | Transcribed locus                                                                           |                      |                | 1.02           | 0.33                  | 9.8E-01              | 1.3E-03               | 1.00                 | 1.00      | 0.00      | 1.00      |
| 1375540_at   | FK506 binding protein 9                                                                     | Fkbp9                | 297123         | 0.96           | 0.33                  | 9.0E-01              | 5.2E-04               | 0.80                 | 1.00      | 1.00      | 1.00      |
| 1388112_at   | solute carrier family 25 (mitochondrial carrier; adenine nucleotide translocator), member 4 | Slc25a4              | 85333          | 0.85           | 0.33                  | 6.3E-01              | 2.8E-03               | 1.00                 | 1.00      | 1.00      | 1.00      |
| 1373249_at   | Transcribed locus                                                                           |                      |                | 0.86           | 0.33                  | 6.5E-01              | 1.3E-03               | 1.00                 | 1.00      | 1.00      | 1.00      |
| 1372054_at   | Transcribed locus                                                                           |                      |                | 1.08           | 0.33                  | 8.1E-01              | 5.2E-03               | 1.00                 | 1.00      | 1.00      | 1.00      |
| 1383175_a_at | similar to C11orf17 protein (predicted)                                                     | RGD1306959_predicted | 361624         | 1.24           | 0.33                  | 5.5E-01              | 9.9E-03               | 1.00                 | 1.00      | 1.00      | 1.00      |
| 1389805_at   | Transcribed locus                                                                           |                      |                | 0.17           | 0.33                  | 7.6E-02              | 1.5E-02               | 0.00                 | 0.00      | 0.00      | 0.50      |
| 1376066_at   | fat tumor suppressor homolog (Drosophila)                                                   | Fath                 | 83720          | 0.90           | 0.33                  | 8.7E-01              | 2.5E-04               | 1.00                 | 1.00      | 1.00      | 1.00      |
| 1367654_at   | Transcribed locus                                                                           |                      |                | 1.52           | 0.33                  | 1.8E-01              | 9.9E-04               | 1.00                 | 1.00      | 1.00      | 1.00      |
| 1376584_at   | Transcribed locus                                                                           |                      |                | 1.35           | 0.33                  | 3.6E-01              | 1.0E-03               | 1.00                 | 1.00      | 1.00      | 1.00      |
| 1375197_at   | Transcribed locus                                                                           |                      |                | 0.81           | 0.33                  | 2.8E-01              | 2.5E-03               | 1.00                 | 1.00      | 1.00      | 1.00      |
| 1371293_at   | similar to Myosin light polypeptide 4 (Myosin light chain 1, atrial isoform)                | LOC688228            | 688228         | 1.25           | 0.33                  | 4.6E-01              | 2.8E-03               | 1.00                 | 1.00      | 0.00      | 1.00      |
| 1367726_at   | thyroid hormone receptor alpha                                                              | Thra                 | 81812          | 0.91           | 0.33                  | 7.7E-01              | 1.4E-03               | 0.90                 | 0.75      | 0.00      | 1.00      |
| 1373239_at   | SH3 and PX domain containing 3 (predicted)                                                  | Sh3px3_predicted     | 315696         | 0.74           | 0.33                  | 4.8E-01              | 6.1E-03               | 0.30                 | 0.50      | 0.00      | 1.00      |
| 1371793_at   | Acetylcholinesterase                                                                        | Ache                 | 83817          | 0.94           | 0.33                  | 8.5E-01              | 1.9E-03               | 1.00                 | 1.00      | 0.80      | 1.00      |
| 1370060_at   | solute carrier family 25 (mitochondrial carrier; oxoglutarate carrier), member 11           | Slc25a11             | 64201          | 0.97           | 0.33                  | 9.3E-01              | 1.4E-03               | 1.00                 | 1.00      | 1.00      | 1.00      |
| 1372612_at   | dynein light chain LC8-type 2                                                               | Dynll2               | 140734         | 0.84           | 0.33                  | 3.8E-01              | 1.1E-03               | 1.00                 | 1.00      | 1.00      | 1.00      |
| 1370447_at   | phospholipase B                                                                             | Phlph                | 192259         | 1.22           | 0.33                  | 7.4E-01              | 3.9E-02               | 1.00                 | 1.00      | 0.80      | 1.00      |
| 1372296_at   | similar to putative SH3BGR protein (predicted)                                              | RGD1563599_predicted | 498066         | 0.82           | 0.33                  | 4.7E-01              | 1.3E-02               | 1.00                 | 1.00      | 1.00      | 1.00      |
| 1387898_at   | heat shock protein, alpha-crystallin-related, B6                                            | Hspb6                | 192245         | 1.03           | 0.33                  | 9.5E-01              | 3.8E-02               | 1.00                 | 1.00      | 1.00      | 1.00      |
| 1389918_at   | Similar to AL023001 protein (predicted)                                                     | RGD1305001_predicted | 304714         | 0.53           | 0.33                  | 4.1E-03              | 1.0E-03               | 0.90                 | 1.00      | 1.00      | 1.00      |
| 1373134_at   | fumarylacetoacetyl hydrolase domain containing 2A (predicted)                               | Fahd2a_predicted     | 296131         | 0.99           | 0.33                  | 9.8E-01              | 3.2E-03               | 1.00                 | 1.00      | 0.60      | 1.00      |
| 1375411_at   | NADH dehydrogenase (ubiquinone) 1 alpha subcomplex, 7 (B14.5a) (predicted)                  | Ndufa7_predicted     | 299643         | 0.74           | 0.33                  | 1.7E-01              | 1.0E-02               | 1.00                 | 1.00      | 1.00      | 1.00      |
| 1375628_at   | NADH dehydrogenase (ubiquinone) 1 beta subcomplex 8 (predicted)                             | Ndufb8_predicted     | 293991         | 0.75           | 0.32                  | 4.8E-01              | 1.2E-02               | 1.00                 | 1.00      | 0.50      | 1.00      |
| 1376924_a_at | palmdelphin                                                                                 | Palmd                | 310811         | 0.90           | 0.32                  | 8.3E-01              | 7.7E-03               | 1.00                 | 1.00      | 0.10      | 1.00      |
| 1371871_at   | RAB12, member RAS oncogene family                                                           | Rab12                | 25530          | 1.04           | 0.32                  | 8.7E-01              | 1.2E-03               | 1.00                 | 1.00      | 1.00      | 1.00      |
| 1388936_at   | cadherin 11                                                                                 | Cdh11                | 84407          | 1.43           | 0.32                  | 2.7E-01              | 1.1E-02               | 1.00                 | 1.00      | 0.80      | 1.00      |
| 1388437_at   | Transcribed locus                                                                           |                      |                | 1.25           | 0.32                  | 4.1E-01              | 2.0E-04               | 1.00                 | 1.00      | 1.00      | 1.00      |
| 1371346_at   | NADH dehydrogenase (ubiquinone) 1 beta subcomplex, 6 (predicted)                            | Ndufb6_predicted     | 297990         | 0.79           | 0.32                  | 4.0E-01              | 8.5E-03               | 1.00                 | 1.00      | 1.00      | 1.00      |
| 1388200_at   | myosin regulatory light chain 2, ventricular/cardiac muscle isoform                         | Mlc2                 | 363925         | 0.84           | 0.32                  | 6.6E-01              | 2.6E-02               | 1.00                 | 1.00      | 1.00      | 1.00      |
| 1368818_at   | proteasome (prosome, macropain) activator subunit 4                                         | Psme4                | 498433         | 1.18           | 0.32                  | 2.8E-01              | 7.6E-04               | 1.00                 | 1.00      | 1.00      | 1.00      |
| 1373967_at   | Transcribed locus                                                                           |                      |                | 1.01           | 0.32                  | 9.9E-01              | 2.5E-03               | 1.00                 | 1.00      | 0.20      | 1.00      |
| 1399130_at   | similar to RIKEN cDNA 261002G08                                                             | LOC502782            | 502782         | 0.83           | 0.32                  | 5.2E-01              | 1.7E-03               | 1.00                 | 1.00      | 1.00      | 1.00      |
| 1368281_at   | dipeptidase 1 (renal)                                                                       | Dpep1                | 94199          | 0.48           | 0.32                  | 2.3E-02              | 4.8E-04               | 0.60                 | 0.88      | 0.60      | 1.00      |
| 1387768_at   | myoglobin                                                                                   | Mb                   | 59108          | 0.84           | 0.32                  | 5.6E-01              | 2.5E-02               | 1.00                 | 1.00      | 1.00      | 1.00      |
| 1372586_at   | Ubiquitin-conjugating enzyme E2D 3 (UBCA5 homolog, yeast)                                   | Ubc2d3               | 81920          | 0.78           | 0.32                  | 3.4E-01              | 5.6E-03               | 1.00                 | 1.00      | 1.00      | 1.00      |
| 1390706_at   | spectrin beta 2                                                                             | Spnb2                | 305614         | 1.52           | 0.32                  | 1.2E-01              | 4.3E-03               | 1.00                 | 1.00      | 1.00      | 1.00      |
| 1371371_at   | NADH dehydrogenase (ubiquinone) 1 beta subcomplex, 4, 15kDa                                 | Ndufb4               | 288088         | 0.81           | 0.32                  | 5.6E-01              | 2.6E-03               | 1.00                 | 1.00      | 1.00      | 1.00      |
| 1371989_at   | high mobility group nucleosomal binding domain 3                                            | Hmg3                 | 113990         | 0.60           | 0.32                  | 2.3E-01              | 6.7E-04               | 1.00                 | 1.00      | 1.00      | 1.00      |
| 1371786_at   | triptarin motif protein 35                                                                  | Trim35               | 498538         | 0.88           | 0.32                  | 5.8E-01              | 4.8E-04               | 1.00                 | 1.00      | 1.00      | 1.00      |
| 1383192_at   | spasin (predicted)                                                                          | Spast_predicted      | 362700         | 0.94           | 0.32                  | 9.0E-01              | 8.9E-02               | 0.40                 | 0.13      | 0.00      | 0.75      |
| 1370642_s_at | platelet derived growth factor receptor, beta polypeptide                                   | Pdgfrb               | 24629          | 1.24           | 0.32                  | 6.2E-01              | 1.0E-02               | 1.00                 | 0.75      | 1.00      | 1.00      |
| 1367604_at   | cysteine-rich protein 2                                                                     | Crip2                | 338401         | 0.88           | 0.32                  | 6.4E-01              | 1.6E-03               | 1.00                 | 1.00      | 1.00      | 1.00      |
| 1372799_at   | deoxyguanosine kinase (predicted)                                                           | Dguok_predicted      | 297389         | 0.60           | 0.32                  | 1.9E-01              | 2.6E-03               | 1.00                 | 1.00      | 1.00      | 1.00      |
| 1375642_at   | ubiquitin-conjugating enzyme E2B, RAD6 homolog (S. cerevisiae)                              | Ubc2b                | 81816          | 1.04           | 0.32                  | 9.3E-01              | 2.0E-03               | 1.00                 | 1.00      | 1.00      | 1.00      |
| 1370238_at   | RAB12, member RAS oncogene family                                                           | Rab12                | 25530          | 0.77           | 0.32                  | 2.4E-01              | 8.0E-03               | 1.00                 | 1.00      | 1.00      | 1.00      |
| 1370288_a_at | tropomyosin 1, alpha                                                                        | Tpm1                 | 24851          | 0.92           | 0.32                  | 7.0E-01              | 1.9E-02               | 1.00                 | 1.00      | 1.00      | 1.00      |
| 1369927_at   | malate dehydrogenase 2, NAD (mitochondrial)                                                 | Mdh2                 | 81829          | 0.90           | 0.32                  | 7.8E-01              | 2.5E-03               | 1.00                 | 1.00      | 1.00      | 1.00      |
| 1371738_at   | similar to hypothetical protein FLJ10375 (predicted)                                        | RGD1308260_predicted | 301111         | 0.99           | 0.32                  | 9.9E-01              | 2.9E-03               | 1.00                 | 1.00      | 1.00      | 1.00      |
| 1388603_a_at | HESB like domain containing 2                                                               | Hbid2                | 290985         | 0.96           | 0.32                  | 8.5E-01              | 8.9E-04               | 1.00                 | 1.00      | 1.00      | 1.00      |
| 1388955_at   | Transcribed locus                                                                           |                      |                | 1.21           | 0.32                  | 5.3E-01              | 1.6E-03               | 1.00                 | 1.00      | 0.60      | 1.00      |
| 1383161_a_at |                                                                                             |                      |                | 0.83           | 0.32                  | 6.6E-01              | 7.7E-03               | 1.00                 | 1.00      | 1.00      | 1.00      |
| 1367764_at   | cyclin G1                                                                                   | Cng1                 | 25405          | 0.97           | 0.32                  | 7.7E-01              | 2.5E-03               | 1.00                 | 1.00      | 1.00      | 1.00      |
| 1370006_at   | Receptor-interacting serine-threonine kinase 3                                              | Ripk3                | 246240         | 0.95           | 0.32                  | 8.9E-01              | 6.6E-03               | 1.00                 | 1.00      | 1.00      | 1.00      |
| 1372149_at   | AU RNA binding protein/enoyl-coenzyme A hydratase (predicted)                               | Auh_predicted        | 361215         | 0.78           | 0.32                  | 2.8E-01              | 1.3E-03               | 1.00                 | 1.00      | 1.00      | 1.00      |
| 1373142_at   | Growth hormone inducible transmembrane protein                                              | Ghltm                | 290596         | 0.94           | 0.32                  | 8.3E-01              | 2.0E-03               | 1.00                 | 1.00      | 1.00      | 1.00      |
| 1368814_at   | aldehyde dehydrogenase family 6, subfamily A1                                               | Aldh6a1              | 81708          | 1.73           | 0.32                  | 2.1E-01              | 7.7E-04               | 1.00                 | 1.00      | 0.70      | 1.00      |
| 1372934_at   | similar to 1700019E19Rik protein (predicted)                                                | RGD1307392_predicted | 299209         | 0.91           | 0.32                  | 6.4E-01              | 9.5E-03               | 1.00                 | 1.00      | 1.00      | 1.00      |
| 1369817_at   | heart and neural crest derivatives expressed transcript 2                                   | Hand2                | 64637          | 1.08           | 0.32                  | 7.7E-01              | 9.5E-04               | 1.00                 | 1.00      | 0.10      | 1.00      |
| 1387873_at   | WAP four-disulfide core domain 1                                                            | Wfdc1                | 171112         | 0.68           | 0.32                  | 2.1E-01              | 1.4E-03               | 1.00                 | 1.00      | 0.30      | 1.00      |
| 1372590_at   | C1q and tumor necrosis factor related protein 1                                             | C1qtnf1              | 303701         | 0.89           | 0.32                  | 7.8E-01              | 6.4E-02               | 0.50                 | 0.13      | 0.00      | 0.75      |
| 1369636_at   | sorbitol dehydrogenase                                                                      | Sord                 | 24788          | 0.80           | 0.32                  | 4.5E-01              | 2.1E-03               | 1.00                 | 1.00      | 0.20      | 1.00      |
| 1373487_at   | Spondin 1                                                                                   | Spon1                | 64456          | 2.64           | 0.32                  | 1.1E-01              | 1.1E-02               | 1.00                 | 0.38      | 1.00      | 1.00      |
| 1372299_at   | cyclin-dependent kinase inhibitor 1C (P57)                                                  | Cdkn1c               | 246060         | 1.22           | 0.32                  | 5.8E-01              | 2.6E-03               | 0.90                 | 0.20      | 0.20      | 1.00      |
| 1389287_at   | CDNA clone IMAGE7193711                                                                     |                      |                | 1.36           | 0.32                  | 2.3E-01              | 4.0E-04               | 1.00                 | 1.00      | 1.00      | 1.00      |
| 1373848_at   | similar to RIKEN cDNA 5730449L18 (predicted)                                                | RGD1308584_predicted | 289083         | 0.72           | 0.31                  | 5.0E-01              | 9.0E-02               | 1.00                 | 1.00      | 0.50      | 1.00      |
| 1388111_at   | elastin                                                                                     | Eln                  | 25043          | 0.93           | 0.31                  | 9.0E-01              | 6.5E-03               | 0.80                 | 0.75      | 0.40      | 1.00      |
| 1371542_at   | tubulin, alpha 4                                                                            | Tuba4                | 316531         | 0.81           | 0.31                  | 4.0E-01              | 1.5E-02               | 1.00                 | 1.00      | 1.00      | 1.00      |
| 1370166_at   | syndecan 2                                                                                  | Sdc2                 | 25615          | 1.29           | 0.31                  | 4.7E-01              | 1.3E-02               | 1.00                 | 1.00      | 1.00      | 1.00      |
| 1373158_at   | Transcribed locus                                                                           |                      |                | 0.76           | 0.31                  | 3.2E-01              | 1.5E-03               | 1.00                 | 1.00      | 1.00      | 1.00      |
| 1373582_at   | similar to CLIP-170-related protein (predicted)                                             | RGD1306245_predicted | 308493         | 1.32           | 0.31                  | 5.4E-01              | 8.2E-02               | 0.00                 | 0.00      | 0.20      | 0.75      |
| 1388167_at   | nuclear factor 1B                                                                           | Nf1b                 | 29227          | 1.06           | 0.31                  | 8.7E-01              | 3.2E-04               | 1.00                 | 1.00      | 0.80      | 1.00      |

| Probe Set ID | Gene Title                                                                                     | Gene Symbol          | Fold Change   |                  | False Discovery Rate |                      | Average Present Call |           |           |          |      |
|--------------|------------------------------------------------------------------------------------------------|----------------------|---------------|------------------|----------------------|----------------------|----------------------|-----------|-----------|----------|------|
|              |                                                                                                |                      | Strain Effect | Rejection Effect | Native BN / DA       | Allograft / Isograft | Native BN            | Native DA | Allograft | Isograft |      |
| 1372144_at   | Dnal (Hsp40) homolog, subfamily B, member 5 (predicted)                                        | Dnajb5_predicted     | 315811        | 1.49             | 0.31                 | 1.2E-01              | 2.1E-02              | 1.00      | 1.00      | 0.20     | 1.00 |
| 1371607_at   | microtubule-associated protein 4                                                               | LOC367171            | 367171        | 1.29             | 0.31                 | 6.0E-01              | 2.5E-03              | 1.00      | 1.00      | 1.00     | 1.00 |
| 1372849_at   | Transcribed locus                                                                              |                      |               | 0.90             | 0.31                 | 8.7E-01              | 3.0E-02              | 1.00      | 1.00      | 0.70     | 1.00 |
| 1371349_at   | procollagen, type VI, alpha 1 (predicted)                                                      | Col6a1_predicted     | 294337        | 1.06             | 0.31                 | 8.7E-01              | 6.5E-02              | 1.00      | 1.00      | 1.00     | 1.00 |
| 1368137_at   | microtubule-associated protein tau                                                             | Mapt                 | 29477         | 1.06             | 0.31                 | 8.3E-01              | 1.6E-03              | 0.90      | 0.63      | 0.00     | 1.00 |
| 1389562_at   | Transcribed locus                                                                              |                      |               | 0.79             | 0.31                 | 5.6E-01              | 3.7E-04              | 0.00      | 0.38      | 0.00     | 1.00 |
| 1387919_at   | mitofusin 2                                                                                    | Mfn2                 | 64476         | 0.92             | 0.31                 | 6.6E-01              | 1.6E-03              | 1.00      | 1.00      | 1.00     | 1.00 |
| 1376861_at   | similar to RIKEN cDNA 1810018L05                                                               | LOC317312            | 317312        | 1.12             | 0.31                 | 8.0E-01              | 1.1E-03              | 1.00      | 1.00      | 1.00     | 1.00 |
| 1387773_at   | cytochrome c, somatic                                                                          | Cytc                 | 25309         | 0.84             | 0.31                 | 5.2E-01              | 5.8E-03              | 1.00      | 1.00      | 1.00     | 1.00 |
| 1389816_at   | Procollagen, type XI, alpha 2 (mapped)                                                         | Col11a2_mapped       | 294279        | 1.10             | 0.31                 | 6.7E-01              | 1.4E-03              | 1.00      | 1.00      | 1.00     | 1.00 |
| 1370855_at   | cystatin C                                                                                     | Cst3                 | 25307         | 0.78             | 0.31                 | 2.5E-01              | 2.4E-03              | 1.00      | 1.00      | 1.00     | 1.00 |
| 1375018_at   | similar to hypothetical protein D630003M21 (predicted)                                         | RGD1563354_predicted | 311592        | 0.78             | 0.31                 | 2.0E-01              | 8.8E-02              | 0.00      | 0.63      | 0.00     | 1.00 |
| 1376320_at   | Transcribed locus                                                                              |                      |               | 0.79             | 0.31                 | 4.8E-01              | 3.5E-02              | 1.00      | 0.50      | 0.00     | 1.00 |
| 1367599_at   | ATP synthase, H+ transporting, mitochondrial F0 complex, subunit c (subunit 9), isoform 1      | Atp5g1               | 29754         | 0.81             | 0.31                 | 4.5E-01              | 2.4E-03              | 1.00      | 1.00      | 1.00     | 1.00 |
| 1371691_at   | retinoic acid receptor responder (tazarotene induced) 2                                        | Rarres2              | 297073        | 1.47             | 0.31                 | 3.6E-01              | 2.5E-02              | 1.00      | 1.00      | 1.00     | 1.00 |
| 1384240_at   | angiotensin II receptor, type 1 (AT1A)                                                         | Agtr1a               | 24180         | 0.65             | 0.31                 | 6.8E-01              | 5.5E-02              | 0.00      | 0.00      | 0.10     | 1.00 |
| 1373092_at   | Transcribed locus                                                                              |                      |               | 1.29             | 0.31                 | 1.8E-01              | 3.0E-03              | 1.00      | 1.00      | 1.00     | 1.00 |
| 1376646_at   | popeye domain containing 2                                                                     | Popdc2               | 360718        | 0.81             | 0.31                 | 4.8E-01              | 5.6E-03              | 1.00      | 1.00      | 1.00     | 1.00 |
| 1387224_at   | diacylglycerol kinase, beta                                                                    | Dgkb                 | 54248         | 0.48             | 0.31                 | 7.6E-02              | 1.1E-04              | 0.20      | 0.10      | 0.80     | 1.00 |
| 1374636_at   | PHD finger protein 17 (predicted)                                                              | Phf17_predicted      | 310352        | 0.86             | 0.31                 | 4.9E-01              | 3.5E-04              | 1.00      | 1.00      | 1.00     | 1.00 |
| 1367959_a_at | sodium channel, voltage-gated, type I, beta                                                    | Scn1b                | 29866         | 1.30             | 0.31                 | 4.7E-01              | 2.1E-02              | 1.00      | 1.00      | 1.00     | 1.00 |
| 1373270_at   | WD repeat domain, phosphoinositide interacting 1 (predicted)                                   | Wip1_predicted       | 303630        | 0.94             | 0.31                 | 8.8E-01              | 6.9E-04              | 1.00      | 1.00      | 1.00     | 1.00 |
| 1371593_at   | Proliferating cell nuclear antigen                                                             | Pcna                 | 25737         | 0.98             | 0.31                 | 9.7E-01              | 1.1E-03              | 1.00      | 1.00      | 1.00     | 1.00 |
| 1392530_at   | similar to NADH dehydrogenase (ubiquinone) 1, subcomplex unknown, 1                            | LOC679398            | 679398        | 0.70             | 0.31                 | 2.6E-01              | 4.0E-03              | 1.00      | 1.00      | 1.00     | 1.00 |
| 1368544_a_at | nucleolar protein 3 (apoptosis repressor with CARD domain)                                     | No3                  | 85383         | 1.71             | 0.31                 | 1.1E-01              | 9.3E-04              | 1.00      | 1.00      | 1.00     | 1.00 |
| 1373839_at   | Neighbor of Punc E11 (predicted)                                                               | Nope_predicted       | 363081        | 1.17             | 0.31                 | 5.1E-01              | 3.2E-03              | 1.00      | 1.00      | 0.60     | 1.00 |
| 1374520_at   | similar to heart alpha-kinase (predicted)                                                      | RGD1564431_predicted | 498875        | 1.30             | 0.31                 | 4.8E-01              | 6.3E-03              | 1.00      | 1.00      | 1.00     | 1.00 |
| 1388323_at   | NADH dehydrogenase (ubiquinone) 1 alpha subcomplex, 9                                          | Ndufa9               | 362440        | 0.83             | 0.31                 | 4.6E-01              | 1.1E-03              | 1.00      | 1.00      | 1.00     | 1.00 |
| 1388361_at   | similar to NADH-ubiquinone oxidoreductase PDSW subunit (Complex I-PDSW) (CI-PDSW)              | LOC681418            | 681418        | 0.73             | 0.31                 | 3.1E-01              | 3.1E-03              | 1.00      | 1.00      | 1.00     | 1.00 |
| 1376750_at   | Transcribed locus                                                                              |                      |               | 0.83             | 0.31                 | 8.4E-01              | 5.4E-03              | 0.00      | 0.00      | 0.00     | 0.50 |
| 1389159_at   | Transcribed locus                                                                              |                      |               | 0.86             | 0.31                 | 7.0E-01              | 2.3E-03              | 1.00      | 0.88      | 0.00     | 1.00 |
| 1376465_at   | Sim ilar to glucocorticoid induced gene 1 (predicted)                                          | RGD1563869_predicted | 310233        | 0.99             | 0.30                 | 9.9E-01              | 1.7E-03              | 1.00      | 1.00      | 0.90     | 1.00 |
| 1376302_at   | Coilin                                                                                         | Coil                 | 50998         | 1.14             | 0.30                 | 5.1E-01              | 1.2E-03              | 1.00      | 0.75      | 0.00     | 1.00 |
| 1389652_at   | Similar to 2700029M09Rik protein (predicted)                                                   | RGD1311747_predicted | 290706        | 0.82             | 0.30                 | 4.8E-01              | 1.7E-03              | 1.00      | 1.00      | 1.00     | 1.00 |
| 1372684_at   | Similar to ovary-specific MOB-like protein (predicted)                                         | RGD1562983_predicted | 499288        | 1.25             | 0.30                 | 5.6E-01              | 4.0E-04              | 1.00      | 1.00      | 1.00     | 1.00 |
| 1373167_at   | Transcribed locus                                                                              |                      |               | 0.75             | 0.30                 | 5.2E-01              | 8.8E-03              | 1.00      | 1.00      | 0.30     | 1.00 |
| 1373836_at   | Forty-two-three domain containing 1                                                            | Fyttd1               | 360726        | 1.14             | 0.30                 | 6.9E-01              | 3.7E-04              | 1.00      | 1.00      | 1.00     | 1.00 |
| 1372440_at   | serine (or cysteine) proteinase inhibitor, clade E, member 2                                   | Serpine2             | 29366         | 1.12             | 0.30                 | 8.4E-01              | 4.5E-03              | 1.00      | 1.00      | 1.00     | 1.00 |
| 1373151_at   | similar to RIKEN cDNA 2810489O06 (predicted)                                                   | RGD1560177_predicted | 499615        | 0.97             | 0.30                 | 9.3E-01              | 1.6E-04              | 1.00      | 1.00      | 1.00     | 1.00 |
| 1377462_at   | Transcribed locus                                                                              |                      |               | 1.24             | 0.30                 | 7.7E-01              | 2.5E-02              | 0.20      | 0.00      | 0.00     | 0.50 |
| 1373883_at   | Similar to PDZ-domain protein scribble (predicted)                                             | RGD1565055_predicted | 362938        | 0.89             | 0.30                 | 5.2E-01              | 3.4E-03              | 1.00      | 1.00      | 0.20     | 1.00 |
| 1375545_at   | RNA binding motif protein 9 (predicted)                                                        | Rbm9_predicted       | 362950        | 1.02             | 0.30                 | 9.7E-01              | 1.7E-04              | 1.00      | 0.50      | 0.40     | 1.00 |
| 1368053_at   | par-3 (partitioning defective 3) homolog (C, elegans)                                          | Par3                 | 81918         | 0.91             | 0.30                 | 8.2E-01              | 2.6E-03              | 1.00      | 0.88      | 0.00     | 1.00 |
| 1388870_at   | similar to RNA-binding protein Musashi2-5 (predicted)                                          | RGD1560397_predicted | 366596        | 0.82             | 0.30                 | 3.2E-01              | 1.0E-03              | 1.00      | 1.00      | 1.00     | 1.00 |
| 1368298_at   | adenylyl cyclase 5                                                                             | Adcy5                | 64532         | 0.99             | 0.30                 | 9.7E-01              | 2.1E-03              | 1.00      | 1.00      | 0.40     | 1.00 |
| 1371475_at   | ribonuclease, RNase A family 4                                                                 | Rnase4               | 56759         | 1.36             | 0.30                 | 1.4E-01              | 3.4E-02              | 1.00      | 1.00      | 1.00     | 1.00 |
| 1390126_at   | Similar to protein tyrosine phosphatase-like (proline instead of catalytic arginine), member b | LOC690040            | 266708        | 0.93             | 0.30                 | 8.2E-01              | 3.2E-03              | 1.00      | 1.00      | 0.50     | 1.00 |
| 1383176_at   | similar to C11orf17 protein (predicted)                                                        | RGD1306959_predicted | 361624        | 1.14             | 0.30                 | 8.0E-01              | 1.2E-02              | 1.00      | 1.00      | 1.00     | 1.00 |
| 1373193_at   | Hypothetical protein LOC690089                                                                 | LOC690089            | 690089        | 0.71             | 0.30                 | 4.9E-01              | 8.2E-03              | 1.00      | 1.00      | 1.00     | 1.00 |
| 1376770_at   | similar to EF hand domain containing 1 (predicted)                                             | RGD1559565_predicted | 501181        | 0.59             | 0.30                 | 1.0E-01              | 1.5E-02              | 1.00      | 1.00      | 0.00     | 1.00 |
| 1394234_x_at | Similar to IQ motif and WD repeats 1 (predicted)                                               | RGD1561961_predicted | 289181        | 0.80             | 0.30                 | 6.7E-01              | 7.3E-04              | 0.80      | 1.00      | 1.00     | 1.00 |
| 1390711_at   |                                                                                                |                      |               | 1.03             | 0.30                 | 9.8E-01              | 3.9E-02              | 0.60      | 0.50      | 0.00     | 1.00 |
| 1369960_at   | GATA binding protein 4                                                                         | Gata4                | 54254         | 0.69             | 0.30                 | 2.9E-01              | 8.0E-03              | 1.00      | 1.00      | 1.00     | 1.00 |
| 1390255_at   | similar to mKIAA0843 protein (predicted)                                                       | RGD1565118_predicted | 307395        | 0.63             | 0.30                 | 1.4E-01              | 1.4E-03              | 1.00      | 1.00      | 1.00     | 1.00 |
| 1371202_a_at | nuclear factor I/B                                                                             | Nf1b                 | 29227         | 1.08             | 0.30                 | 8.3E-01              | 2.2E-04              | 1.00      | 1.00      | 1.00     | 1.00 |
| 1370178_at   | calcium channel, voltage-dependent, beta 2 subunit                                             | Caacb2               | 116600        | 0.83             | 0.30                 | 3.3E-01              | 2.4E-03              | 1.00      | 1.00      | 1.00     | 1.00 |
| 1370816_at   | nuclear receptor subfamily 1, group D, member 1                                                | Nr1d1                | 25297         | 0.80             | 0.30                 | 4.0E-01              | 8.3E-04              | 1.00      | 1.00      | 1.00     | 1.00 |
| 1389333_at   | similar to F-box only protein 3 isoform 1                                                      | LOC687307            | 687307        | 1.11             | 0.30                 | 7.0E-01              | 6.2E-04              | 1.00      | 1.00      | 1.00     | 1.00 |
| 1386993_at   | myosin, heavy polypeptide 7, cardiac muscle, beta                                              | Myl7                 | 29557         | 1.93             | 0.30                 | 5.2E-02              | 1.8E-02              | 1.00      | 1.00      | 1.00     | 1.00 |
| 1375295_at   | Citrate synthase                                                                               | Cs                   | 170587        | 1.20             | 0.30                 | 6.6E-01              | 4.3E-03              | 1.00      | 1.00      | 1.00     | 1.00 |
| 1388975_at   | succinate-Coenzyme A ligase, ADP-forming, beta subunit (predicted)                             | Sucla2_predicted     | 361071        | 0.98             | 0.30                 | 9.7E-01              | 1.1E-03              | 1.00      | 1.00      | 1.00     | 1.00 |
| 1375685_at   | cytoplasmic linker associated protein 1                                                        | Clasp1               | 304740        | 0.93             | 0.30                 | 8.9E-01              | 1.7E-04              | 1.00      | 1.00      | 1.00     | 1.00 |
| 1387709_at   | c-fos induced growth factor                                                                    | Figf                 | 360457        | 0.61             | 0.30                 | 7.3E-02              | 5.8E-02              | 0.00      | 0.00      | 0.00     | 0.63 |
| 1389332_at   | Transcribed locus                                                                              |                      |               | 1.82             | 0.30                 | 8.4E-02              | 2.1E-04              | 1.00      | 1.00      | 1.00     | 1.00 |
| 1373937_at   | FYVE and coiled-coil domain containing 1 (predicted)                                           | Fyco1_predicted      | 301085        | 1.14             | 0.29                 | 6.8E-01              | 1.9E-03              | 1.00      | 1.00      | 1.00     | 1.00 |
| 1388489_at   | similar to NADH-ubiquinone oxidoreductase B9 subunit (Complex I-B9) (CI-B9)                    | LOC683547            | 683547        | 0.78             | 0.29                 | 5.2E-01              | 9.9E-03              | 1.00      | 1.00      | 1.00     | 1.00 |
| 1389354_at   | similar to semaF cytoplasmic domain associated protein 2                                       | LOC365960            | 365960        | 0.69             | 0.29                 | 2.5E-01              | 2.7E-03              | 1.00      | 1.00      | 1.00     | 1.00 |
| 1374173_at   | Hexosaminidase B                                                                               | Hexb                 | 294673        | 0.79             | 0.29                 | 7.1E-01              | 1.7E-02              | 0.80      | 1.00      | 0.10     | 1.00 |
| 1388925_at   | sirtuin 5 (silent mating type information regulation 2 homolog) 5 (S. cerevisiae)              | Sirt5                | 30840         | 0.92             | 0.29                 | 7.9E-01              | 1.6E-03              | 1.00      | 1.00      | 1.00     | 1.00 |
| 1376572_a_at | supervillin (predicted)                                                                        | Svil_predicted       | 361256        | 1.32             | 0.29                 | 1.8E-01              | 4.1E-04              | 1.00      | 1.00      | 1.00     | 1.00 |
| 1371634_at   | similar to RIKEN cDNA 1810020E01                                                               | RGD1305677           | 295113        | 0.82             | 0.29                 | 4.9E-01              | 3.5E-03              | 1.00      | 1.00      | 1.00     | 1.00 |
| 1372338_at   | similar to CG9240-PA                                                                           | LOC687395            | 687395        | 1.06             | 0.29                 | 9.0E-01              | 2.5E-03              | 1.00      | 1.00      | 1.00     | 1.00 |
| 1376125_at   | Activity and neurotransmitter-induced early gene 11 (ania-11) mRNA, 3' UTR                     |                      |               | 1.10             | 0.29                 | 7.0E-01              | 5.7E-04              | 1.00      | 1.00      | 1.00     | 1.00 |
| 1367828_at   | acetyl-Coenzyme A dehydrogenase, short chain                                                   | Acads                | 64304         | 0.90             | 0.29                 | 7.9E-01              | 2.5E-03              | 1.00      | 1.00      | 1.00     | 1.00 |
| 1388908_at   | peroxisomal delta3, delta2-enoyl-Coenzyme A isomerase                                          | Peci                 | 291075        | 0.86             | 0.29                 | 5.6E-01              | 1.4E-03              | 1.00      | 1.00      | 1.00     | 1.00 |
| 1388403_at   | similar to NADP+-specific isocitrate dehydrogenase                                             | LOC361596            | 361596        | 0.86             | 0.29                 | 6.1E-01              | 4.4E-03              | 1.00      | 1.00      | 1.00     | 1.00 |
| 1372762_at   | HD domain containing 3 (predicted)                                                             | Hddc3_predicted      | 308758        | 0.82             | 0.29                 | 4.0E-01              | 9.1E-04              | 1.00      | 1.00      | 1.00     | 1.00 |

| Probe Set ID | Gene Title                                                                                                                            | Entrez Gene ID       | Fold Change   |                  | False Discovery Rate |                      | Average Present Call |           |           |          |      |
|--------------|---------------------------------------------------------------------------------------------------------------------------------------|----------------------|---------------|------------------|----------------------|----------------------|----------------------|-----------|-----------|----------|------|
|              |                                                                                                                                       |                      | Strain Effect | Rejection Effect | Native BN / DA       | Allograft / Isograft | Native BN            | Native DA | Allograft | Isograft |      |
| 1374275_at   | carbonic anhydrase 11                                                                                                                 | Car11                | 308588        | 0.75             | 0.29                 | 4.8E-01              | 8.9E-02              | 0.80      | 0.13      | 0.00     | 0.75 |
| 1377807_a_at | Similar to IQ motif and WD repeats 1 (predicted)                                                                                      | RGD1561961_predicted | 289181        | 1.26             | 0.29                 | 3.9E-01              | 8.7E-03              | 1.00      | 1.00      | 1.00     | 1.00 |
| 1375001_at   | Transcribed locus                                                                                                                     |                      |               | 0.50             | 0.29                 | 9.5E-02              | 1.2E-02              | 0.40      | 1.00      | 0.00     | 1.00 |
| 1388799_at   | kelch-like 7 (Drosophila)                                                                                                             | Kih7                 | 362303        | 1.43             | 0.29                 | 6.4E-02              | 1.2E-03              | 1.00      | 1.00      | 1.00     | 1.00 |
| 1372733_at   | similar to intracellular membrane-associated calcium-independent phospholipase A2 gamma (predicted)                                   | RGD1311444_predicted | 314075        | 0.99             | 0.29                 | 9.9E-01              | 1.2E-03              | 1.00      | 1.00      | 1.00     | 1.00 |
| 1368008_at   | prominin 1                                                                                                                            | Prom1                | 60357         | 0.52             | 0.29                 | 9.8E-02              | 1.4E-03              | 1.00      | 1.00      | 1.00     | 1.00 |
| 1388569_at   | serine (or cysteine) peptidase inhibitor, clade F, member 1                                                                           | Serpin1              | 287526        | 1.55             | 0.29                 | 2.9E-01              | 7.6E-02              | 1.00      | 1.00      | 0.80     | 1.00 |
| 1375898_at   | similar to RNA binding protein gene with multiple splicing (predicted)                                                                | RGD1561067_predicted | 498642        | 1.06             | 0.29                 | 8.2E-01              | 1.7E-03              | 1.00      | 1.00      | 1.00     | 1.00 |
| 1372603_at   | protein kinase C and casein kinase substrate in neurons 3                                                                             | Pascin3              | 311187        | 1.29             | 0.29                 | 3.7E-01              | 2.8E-03              | 1.00      | 1.00      | 1.00     | 1.00 |
| 1373892_at   | F-box and leucine-rich repeat protein 17 (predicted)                                                                                  | Fbxl17_predicted     | 316663        | 0.89             | 0.29                 | 6.7E-01              | 1.4E-03              | 1.00      | 1.00      | 1.00     | 1.00 |
| 1388546_at   |                                                                                                                                       |                      |               | 1.18             | 0.29                 | 6.0E-01              | 2.4E-03              | 1.00      | 1.00      | 1.00     | 1.00 |
| 1367907_a_at | clathrin, light polypeptide (Lcb)                                                                                                     | Cltb                 | 116561        | 1.05             | 0.29                 | 8.8E-01              | 2.0E-03              | 1.00      | 1.00      | 1.00     | 1.00 |
| 1372273_at   | glycophorin C (Gerbich blood group)                                                                                                   | Gypc                 | 364837        | 0.85             | 0.29                 | 5.2E-01              | 3.6E-03              | 1.00      | 1.00      | 1.00     | 1.00 |
| 1374969_at   | similar to phosphoglucomutase 5                                                                                                       | LOC679990            | 679990        | 1.37             | 0.29                 | 3.0E-01              | 1.4E-03              | 1.00      | 1.00      | 0.60     | 1.00 |
| 1376785_at   | Synaptonemal complex protein 3                                                                                                        | Sycp3                | 25561         | 0.88             | 0.29                 | 8.0E-01              | 3.8E-02              | 1.00      | 1.00      | 0.20     | 1.00 |
| 1368371_at   | potassium voltage-gated channel, subfamily Q, member 1                                                                                | Kcnq1                | 84020         | 0.78             | 0.29                 | 5.0E-01              | 5.0E-03              | 0.60      | 1.00      | 0.00     | 0.75 |
| 1374278_at   | Transcribed locus                                                                                                                     |                      |               | 0.71             | 0.29                 | 4.9E-02              | 3.2E-03              | 1.00      | 1.00      | 0.40     | 1.00 |
| 1377456_at   |                                                                                                                                       |                      |               | 0.57             | 0.29                 | 4.7E-01              | 1.7E-03              | 1.00      | 1.00      | 0.10     | 1.00 |
| 1389527_at   | promethin                                                                                                                             | LOC378467            | 378467        | 0.81             | 0.29                 | 2.3E-01              | 1.0E-03              | 1.00      | 1.00      | 1.00     | 1.00 |
| 1388343_at   | NADH dehydrogenase (ubiquinone) 1 beta subcomplex, 7 (predicted)                                                                      | Ndufv7_predicted     | 361385        | 0.64             | 0.29                 | 2.3E-01              | 7.0E-03              | 1.00      | 1.00      | 1.00     | 1.00 |
| 1376200_at   | Unknown (protein for MGC:72974)                                                                                                       | MGC72974             | 316976        | 1.10             | 0.29                 | 7.9E-01              | 1.2E-03              | 1.00      | 1.00      | 1.00     | 1.00 |
| 1374171_at   | Transcribed locus                                                                                                                     |                      |               | 1.19             | 0.28                 | 5.4E-01              | 1.5E-03              | 1.00      | 1.00      | 1.00     | 1.00 |
| 1369989_at   | pyridoxine 5'-phosphate oxidase                                                                                                       | Pnpo                 | 64533         | 0.41             | 0.28                 | 1.2E-01              | 7.0E-03              | 1.00      | 1.00      | 0.60     | 1.00 |
| 1388118_at   | 3-hydroxyisobutyrate dehydrogenase                                                                                                    | Hibadh               | 63938         | 0.87             | 0.28                 | 4.3E-01              | 1.6E-03              | 1.00      | 1.00      | 1.00     | 1.00 |
| 1379380_at   | sprouty homolog 1 (Drosophila) (predicted)                                                                                            | Spry1_predicted      | 294981        | 1.04             | 0.28                 | 9.4E-01              | 2.2E-04              | 1.00      | 1.00      | 0.00     | 1.00 |
| 1373351_at   | ankyrin 2, neuronal                                                                                                                   | Ank2                 | 362036        | 0.69             | 0.28                 | 3.8E-01              | 1.9E-03              | 1.00      | 1.00      | 1.00     | 1.00 |
| 1390664_at   | hypothetical protein LOC687361                                                                                                        | LOC687361            | 687361        | 0.95             | 0.28                 | 8.9E-01              | 2.6E-03              | 1.00      | 1.00      | 1.00     | 1.00 |
| 1388465_at   | Transcribed locus                                                                                                                     |                      |               | 1.02             | 0.28                 | 9.0E-01              | 3.3E-03              | 1.00      | 1.00      | 1.00     | 1.00 |
| 1386981_at   | solute carrier family 16 (monocarboxylic acid transporters), member 1                                                                 | Slc16a1              | 25027         | 1.45             | 0.28                 | 2.6E-01              | 1.9E-04              | 1.00      | 1.00      | 1.00     | 1.00 |
| 1385548_at   | similar to ubiquitin-conjugating enzyme E2D 1, UBC4/5 homolog                                                                         | LOC687789            | 687789        | 0.82             | 0.28                 | 2.8E-01              | 4.6E-04              | 1.00      | 1.00      | 0.00     | 1.00 |
| 1367897_at   | acyl-Coenzyme A dehydrogenase, very long chain                                                                                        | Acadvl               | 25363         | 0.96             | 0.28                 | 9.2E-01              | 2.6E-04              | 1.00      | 1.00      | 1.00     | 1.00 |
| 1376692_at   | homeodomain interacting protein kinase 2 (predicted)                                                                                  | Hipk2_predicted      | 362342        | 1.17             | 0.28                 | 6.8E-01              | 1.1E-03              | 1.00      | 0.50      | 0.20     | 1.00 |
| 1398417_at   | feminization 1 homolog a (C. elegans)                                                                                                 | Fem1a                | 316131        | 1.09             | 0.28                 | 6.7E-01              | 1.0E-03              | 1.00      | 1.00      | 1.00     | 1.00 |
| 1398265_at   | ATP-binding cassette, sub-family C (CFTR/MRP), member 9                                                                               | Abcx9                | 25560         | 1.46             | 0.28                 | 2.9E-01              | 1.7E-03              | 1.00      | 1.00      | 0.60     | 1.00 |
| 1377011_at   | similar to hypothetical protein CG003 (predicted)                                                                                     | RGD1307034_predicted | 304244        | 0.85             | 0.28                 | 6.6E-01              | 4.8E-04              | 1.00      | 1.00      | 1.00     | 1.00 |
| 1370333_a_at | insulin-like growth factor 1                                                                                                          | Igf1                 | 24482         | 1.37             | 0.28                 | 3.1E-01              | 1.2E-03              | 0.70      | 0.00      | 0.80     | 1.00 |
| 1389650_at   | Transcribed locus, strongly similar to XP_238535.3 similar to hypothetical protein DKFZp547K1113 [Rattus norvegicus]                  |                      |               | 0.41             | 0.28                 | 3.3E-03              | 1.0E-02              | 1.00      | 1.00      | 0.20     | 1.00 |
| 1387010_s_at | sodium channel, voltage-gated, type I, beta                                                                                           | Scn1b                | 29686         | 1.00             | 0.28                 | 9.9E-01              | 4.4E-03              | 1.00      | 1.00      | 1.00     | 1.00 |
| 1390480_at   | Transcribed locus                                                                                                                     |                      |               | 0.30             | 0.28                 | 2.8E-01              | 5.4E-04              | 0.00      | 1.00      | 0.30     | 1.00 |
| 1374004_at   | similar to RIKEN cDNA D030028O16                                                                                                      | RGD1310143           | 298771        | 1.37             | 0.28                 | 3.0E-01              | 2.9E-03              | 1.00      | 1.00      | 1.00     | 1.00 |
| 1370276_at   | ATP synthase, H+ transporting, mitochondrial F1 complex, O subunit                                                                    | Atp5o                | 192241        | 0.63             | 0.28                 | 1.5E-01              | 4.8E-03              | 1.00      | 1.00      | 1.00     | 1.00 |
| 1377072_at   | Transcribed locus, weakly similar to XP_238535.3 similar to ankyrin repeat domain 25 [Rattus norvegicus]                              |                      |               | 1.08             | 0.28                 | 7.6E-01              | 6.1E-04              | 0.60      | 0.50      | 0.00     | 1.00 |
| 1372568_at   | EPM2A (laforin) interacting protein 1 (predicted)                                                                                     | Epm2aip1_predicted   | 316021        | 1.11             | 0.28                 | 5.9E-01              | 1.1E-03              | 1.00      | 1.00      | 1.00     | 1.00 |
| 1371482_at   | NADH dehydrogenase (ubiquinone) Fe-S protein 2                                                                                        | Ndufs2               | 289218        | 0.90             | 0.28                 | 6.5E-01              | 1.7E-03              | 1.00      | 1.00      | 1.00     | 1.00 |
| 1374060_at   | Transcribed locus                                                                                                                     |                      |               | 1.09             | 0.28                 | 8.6E-01              | 1.1E-03              | 1.00      | 1.00      | 1.00     | 1.00 |
| 1367678_at   | succinate dehydrogenase complex, subunit A, flavoprotein (Fp)                                                                         | Sdha                 | 157074        | 1.01             | 0.28                 | 9.8E-01              | 3.6E-03              | 1.00      | 1.00      | 1.00     | 1.00 |
| 1371554_at   | similar to Teletthonin (Ttin cap protein)                                                                                             | LOC688173            | 688173        | 0.80             | 0.28                 | 5.0E-01              | 1.2E-02              | 1.00      | 1.00      | 1.00     | 1.00 |
| 1383222_at   | FERM-domain-containing protein 163SCII                                                                                                | LOC257646            | 257646        | 0.95             | 0.28                 | 8.6E-01              | 1.7E-03              | 1.00      | 1.00      | 1.00     | 1.00 |
| 1374685_at   | Transcribed locus                                                                                                                     |                      |               | 1.69             | 0.28                 | 2.6E-01              | 3.0E-03              | 1.00      | 1.00      | 0.80     | 1.00 |
| 1374466_at   | Transcribed locus                                                                                                                     |                      |               | 1.42             | 0.28                 | 6.6E-01              | 1.2E-03              | 1.00      | 1.00      | 0.90     | 1.00 |
| 1390253_at   | ankyrin repeat domain 9                                                                                                               | Ankrd9               | 314457        | 1.13             | 0.28                 | 7.3E-01              | 2.4E-02              | 0.40      | 0.13      | 0.00     | 0.50 |
| 1390203_at   | Transcribed locus, strongly similar to XP_580018.1 hypothetical protein XP_580018 [Rattus norvegicus]                                 |                      |               | 1.10             | 0.28                 | 7.7E-01              | 3.3E-03              | 1.00      | 1.00      | 1.00     | 1.00 |
| 1369127_a_at | prostaglandin F receptor                                                                                                              | Ptgfr                | 25652         | 0.89             | 0.28                 | 8.1E-01              | 1.0E-02              | 0.50      | 0.13      | 0.00     | 1.00 |
| 1387398_at   | protein kinase inhibitor, alpha                                                                                                       | Pkia                 | 114906        | 1.36             | 0.28                 | 2.0E-01              | 8.1E-03              | 1.00      | 1.00      | 0.00     | 1.00 |
| 1372110_at   | Transcribed locus                                                                                                                     |                      |               | 1.43             | 0.28                 | 1.8E-01              | 1.2E-03              | 1.00      | 1.00      | 1.00     | 1.00 |
| 1382446_at   | mitochondrial ATP synthase regulatory component factor B                                                                              | Atp5b                | 362749        | 0.85             | 0.28                 | 6.6E-01              | 4.0E-04              | 1.00      | 1.00      | 1.00     | 1.00 |
| 1390996_at   | SH3-domain GRB2-like B1 (endophilin)                                                                                                  | Sh3gbl               | 29255         | 0.81             | 0.28                 | 6.2E-01              | 1.8E-03              | 1.00      | 1.00      | 1.00     | 1.00 |
| 1390592_at   | similar to SH3-domain binding protein 3                                                                                               | LOC688018            | 688018        | 0.66             | 0.28                 | 2.2E-01              | 2.3E-03              | 1.00      | 1.00      | 1.00     | 1.00 |
| 1373362_at   | ubiquinol cytochrome c reductase core protein 2                                                                                       | Uqcrc2               | 293448        | 1.08             | 0.28                 | 8.0E-01              | 2.0E-03              | 1.00      | 1.00      | 1.00     | 1.00 |
| 1370164_at   | hydroxyacyl-Coenzyme A dehydrogenase/3-ketoacyl-Coenzyme A thiolase/enoyl-Coenzyme A hydratase (trifunctional protein), alpha subunit | Hadh                 | 170670        | 0.89             | 0.28                 | 7.0E-01              | 1.5E-03              | 1.00      | 1.00      | 1.00     | 1.00 |
| 1367818_at   | coenzyme Q3 homolog, methyltransferase (yeast)                                                                                        | Coq3                 | 29309         | 0.87             | 0.28                 | 7.1E-01              | 8.1E-04              | 1.00      | 1.00      | 0.80     | 1.00 |
| 1372524_at   | Transcribed locus                                                                                                                     |                      |               | 1.03             | 0.28                 | 9.4E-01              | 2.2E-04              | 1.00      | 1.00      | 1.00     | 1.00 |
| 1367653_a_at | malate dehydrogenase 1, NAD (soluble)                                                                                                 | Mdh1                 | 24551         | 0.91             | 0.28                 | 7.9E-01              | 1.2E-03              | 1.00      | 1.00      | 1.00     | 1.00 |
| 1389610_at   | Transcribed locus                                                                                                                     |                      |               | 1.12             | 0.28                 | 7.5E-01              | 2.7E-02              | 1.00      | 1.00      | 0.40     | 1.00 |
| 1386934_at   | solute carrier family 6 (neurotransmitter transporter, creatine), member 8                                                            | Slc6a8               | 50690         | 1.79             | 0.27                 | 1.3E-02              | 2.7E-03              | 1.00      | 1.00      | 1.00     | 1.00 |
| 1386867_at   | brain protein 44-like                                                                                                                 | Brp44l               | 171087        | 0.91             | 0.27                 | 7.2E-01              | 4.1E-03              | 1.00      | 1.00      | 1.00     | 1.00 |
| 1377463_at   | Mannosidase 2, alpha 2 (predicted)                                                                                                    | Man2a2_predicted     | 308757        | 0.93             | 0.27                 | 9.1E-01              | 7.1E-03              | 1.00      | 0.75      | 0.80     | 1.00 |
| 1374959_at   | NAD(P)H dehydrogenase, quinone 2                                                                                                      | Nqo2                 | 291084        | 0.63             | 0.27                 | 1.3E-01              | 1.3E-03              | 1.00      | 1.00      | 1.00     | 1.00 |
| 1367869_at   | oxidation resistance 1                                                                                                                | Oxr1                 | 117520        | 0.54             | 0.27                 | 1.3E-01              | 2.2E-03              | 1.00      | 1.00      | 1.00     | 1.00 |
| 1371388_at   | pyruvate dehydrogenase (lipoamide) beta                                                                                               | Pdhb                 | 289950        | 0.89             | 0.27                 | 6.2E-01              | 6.4E-04              | 1.00      | 1.00      | 1.00     | 1.00 |
| 1382061_at   | lactate dehydrogenase D                                                                                                               | Ldh                  | 307858        | 0.96             | 0.27                 | 8.0E-01              | 1.1E-03              | 1.00      | 1.00      | 0.70     | 1.00 |
| 1390259_at   | similar to ubiquitin-conjugating enzyme E2D 1, UBC4/5 homolog                                                                         | LOC687789            | 687789        | 0.75             | 0.27                 | 1.8E-01              | 4.3E-03              | 1.00      | 1.00      | 1.00     | 1.00 |
| 1373922_at   | Transcribed locus                                                                                                                     |                      |               | 1.76             | 0.27                 | 2.4E-01              | 2.9E-04              | 1.00      | 1.00      | 0.70     | 1.00 |
| 1371416_at   | NADH dehydrogenase (ubiquinone) flavoprotein 1                                                                                        | Ndufv1               | 293655        | 0.95             | 0.27                 | 7.9E-01              | 1.2E-03              | 1.00      | 1.00      | 1.00     | 1.00 |
| 1371369_at   | procollagen, type VI, alpha 2                                                                                                         | Col6a2               | 361821        | 1.36             | 0.27                 | 3.7E-01              | 9.9E-02              | 0.50      | 0.25      | 0.80     | 1.00 |
| 1387059_at   | serine/threonine kinase 39, STE20/SPS1 homolog (yeast)                                                                                | Stk39                | 54348         | 0.77             | 0.27                 | 4.9E-01              | 2.8E-03              | 1.00      | 1.00      | 1.00     | 1.00 |
| 1369679_a_at | nuclear factor 1A                                                                                                                     | Nfia                 | 25492         | 1.25             | 0.27                 | 5.1E-01              | 2.2E-03              | 1.00      | 1.00      | 0.60     | 1.00 |

| Probe Set ID | Gene Title                                                                                                                         | Gene Symbol          | Fold Change   |                  | False Discovery Rate |                      | Average Present Call |           |           |          |      |
|--------------|------------------------------------------------------------------------------------------------------------------------------------|----------------------|---------------|------------------|----------------------|----------------------|----------------------|-----------|-----------|----------|------|
|              |                                                                                                                                    |                      | Strain Effect | Rejection Effect | Native BN / DA       | Allograft / Isograft | Native BN            | Native DA | Allograft | Isograft |      |
| 1373074_at   | similar to RIKEN cDNA 2700002I20                                                                                                   | RGD1307279           | 0.83          | 0.27             | 5.4E-01              | 8.1E-04              | 1.00                 | 1.00      | 1.00      | 1.00     |      |
| 1371323_at   | General transcription factor IIIC, polypeptide 5 (predicted)                                                                       | Gtf3e5_predicted     | 0.85          | 0.27             | 6.6E-01              | 1.9E-03              | 1.00                 | 1.00      | 1.00      | 1.00     |      |
| 1388160_a_at | isocitrate dehydrogenase 3 (NAD+) beta                                                                                             | ldh3b                | 0.92          | 0.27             | 7.4E-01              | 2.1E-03              | 1.00                 | 1.00      | 1.00      | 1.00     |      |
| 1374698_at   | similar to Cytochrome c oxidase polypeptide VIIa-heart, mitochondrial precursor (Cytochrome c oxidase subunit VIIa-H) (COX VIIa-M) | LOC687508            | 0.89          | 0.27             | 7.4E-01              | 3.2E-04              | 1.00                 | 1.00      | 1.00      | 1.00     |      |
| 1389253_at   | vanin 1                                                                                                                            | Vnn1                 | 1.57          | 0.27             | 3.8E-02              | 4.3E-04              | 1.00                 | 1.00      | 0.00      | 1.00     |      |
| 1388304_at   | NADH dehydrogenase (ubiquinone) 1 beta subcomplex, 5 (predicted)                                                                   | Ndufb5_predicted     | 0.81          | 0.27             | 4.1E-01              | 2.7E-03              | 1.00                 | 1.00      | 1.00      | 1.00     |      |
| 1369633_at   | chemokine (C-X-C motif) ligand 12                                                                                                  | Cxcl12               | 24772         | 1.81             | 0.27                 | 1.4E-02              | 9.1E-03              | 1.00      | 1.00      | 0.90     | 1.00 |
| 1376180_at   | Similar to RIKEN cDNA 1700012B09 (predicted)                                                                                       | RGD1561795_predicted | 500945        | 0.58             | 0.27                 | 3.9E-01              | 2.6E-03              | 1.00      | 1.00      | 0.10     | 1.00 |
| 1373934_at   |                                                                                                                                    |                      | 0.66          | 0.27             | 9.8E-02              | 1.3E-03              | 1.00                 | 1.00      | 1.00      | 1.00     |      |
| 1376380_at   | Transcribed locus                                                                                                                  |                      | 1.11          | 0.27             | 8.7E-01              | 5.6E-02              | 0.70                 | 0.75      | 0.00      | 1.00     |      |
| 1371436_at   | dimethylarginine dimethylaminohydrolase 2                                                                                          | Ddah2                | 294239        | 0.84             | 0.27                 | 5.4E-01              | 3.0E-03              | 0.90      | 0.50      | 0.00     | 1.00 |
| 1374710_at   | Transcribed locus                                                                                                                  |                      | 0.94          | 0.27             | 7.7E-01              | 7.5E-03              | 1.00                 | 1.00      | 1.00      | 1.00     |      |
| 1388462_at   | similar to SH3-binding kinase                                                                                                      | LOC292603            | 292603        | 0.93             | 0.27                 | 7.9E-01              | 2.8E-02              | 0.80      | 0.50      | 0.00     | 1.00 |
| 1392890_at   | platelet-activating factor acetylhydrolase, isoform 1b, alpha subunit 45kDa                                                        | Pafah1b1             | 83572         | 1.21             | 0.27                 | 8.6E-01              | 1.6E-02              | 0.40      | 0.25      | 0.00     | 0.88 |
| 1375517_at   | tumor protein p53 inducible nuclear protein 2                                                                                      | Trp53inp2            | 362246        | 1.09             | 0.27                 | 6.6E-01              | 3.7E-04              | 1.00      | 1.00      | 1.00     | 1.00 |
| 1384217_at   | zinc fingers and homeobox 2                                                                                                        | Zfx2                 | 314988        | 1.06             | 0.27                 | 9.5E-01              | 6.4E-04              | 1.00      | 1.00      | 1.00     | 1.00 |
| 1373223_at   | Transcribed locus                                                                                                                  |                      | 0.77          | 0.26             | 5.2E-01              | 3.3E-03              | 0.00                 | 0.00      | 0.20      | 1.00     |      |
| 1389601_at   | nuclear factor 1B                                                                                                                  | Nf1b                 | 29227         | 0.89             | 0.26                 | 6.6E-01              | 1.3E-03              | 1.00      | 1.00      | 0.90     | 1.00 |
| 1372159_at   | Transcribed locus                                                                                                                  |                      | 0.81          | 0.26             | 4.0E-01              | 1.6E-03              | 1.00                 | 1.00      | 1.00      | 1.00     |      |
| 1377015_at   | Transcribed locus                                                                                                                  |                      | 0.75          | 0.26             | 3.3E-01              | 6.9E-04              | 1.00                 | 1.00      | 0.20      | 1.00     |      |
| 1389180_at   | Transcribed locus                                                                                                                  |                      | 0.89          | 0.26             | 7.8E-01              | 2.2E-03              | 1.00                 | 1.00      | 0.60      | 1.00     |      |
| 1389024_at   | similar to Sec1 family domain containing protein 2 (Syntaxin binding protein 1-like 1) (Neuronal Sec1)                             | LOC498353            | 498353        | 0.83             | 0.26                 | 4.8E-01              | 1.2E-03              | 1.00      | 1.00      | 0.00     | 1.00 |
| 1373581_at   | Similar to KIAA0672 gene product                                                                                                   | RGD1305664           | 303222        | 1.62             | 0.26                 | 6.4E-02              | 3.5E-04              | 1.00      | 1.00      | 0.30     | 1.00 |
| 1386974_at   | pleckstrin homology-like domain, family B, member 1                                                                                | Phldb1               | 171434        | 1.22             | 0.26                 | 8.3E-01              | 4.4E-03              | 0.30      | 0.00      | 0.00     | 1.00 |
| 1387441_at   | potassium channel, subfamily K, member 3                                                                                           | Kenk3                | 29553         | 1.35             | 0.26                 | 2.9E-01              | 4.0E-03              | 1.00      | 1.00      | 0.70     | 1.00 |
| 1387053_at   | flavin containing monooxygenase 1                                                                                                  | Fmo1                 | 25256         | 1.13             | 0.26                 | 8.0E-01              | 8.3E-04              | 1.00      | 1.00      | 0.10     | 1.00 |
| 1376184_at   | Ly6/neurotoxin 1 (predicted)                                                                                                       | Lynx1_predicted      | 300018        | 0.56             | 0.26                 | 2.3E-01              | 9.5E-04              | 1.00      | 1.00      | 0.20     | 1.00 |
| 1388469_at   | Insulin-like growth factor 1                                                                                                       | Igf1                 | 24482         | 1.52             | 0.26                 | 3.7E-01              | 8.8E-03              | 1.00      | 1.00      | 1.00     | 1.00 |
| 1398378_at   | glutathione S-transferase kappa 1                                                                                                  | Gstk1                | 297029        | 0.82             | 0.26                 | 4.3E-01              | 2.0E-03              | 1.00      | 1.00      | 1.00     | 1.00 |
| 1371576_at   | mitochondrial ribosomal protein S36 (predicted)                                                                                    | Mrps36_predicted     | 294696        | 0.72             | 0.26                 | 3.5E-01              | 2.1E-03              | 1.00      | 1.00      | 1.00     | 1.00 |
| 1387914_at   | cytochrome P450, family 27, subfamily a, polypeptide 1                                                                             | Cyp27a1              | 301517        | 0.77             | 0.26                 | 5.3E-01              | 1.8E-03              | 1.00      | 1.00      | 1.00     | 1.00 |
| 1388611_at   | transcription elongation factor A (SID), 3                                                                                         | Tea3                 | 298559        | 0.67             | 0.26                 | 2.8E-01              | 3.1E-03              | 1.00      | 1.00      | 1.00     | 1.00 |
| 1399056_at   | similar to CG10585-PA                                                                                                              | LOC365592            | 365592        | 0.74             | 0.26                 | 3.3E-01              | 4.0E-02              | 0.80      | 1.00      | 0.00     | 1.00 |
| 1398249_at   | solute carrier family 25 (mitochondrial carnitine/aclycarnitine translocase), member 20                                            | Slc25a20             | 117035        | 0.70             | 0.26                 | 2.5E-01              | 3.0E-04              | 1.00      | 1.00      | 1.00     | 1.00 |
| 1390020_at   | Similar to HORMA domain containing 2                                                                                               | LOC498400            | 305479        | 1.04             | 0.26                 | 9.2E-01              | 1.2E-03              | 1.00      | 1.00      | 1.00     | 1.00 |
| 1370068_at   | phospholipase A2, group V                                                                                                          | Pla2g5               | 29354         | 0.76             | 0.26                 | 3.8E-01              | 3.1E-04              | 1.00      | 1.00      | 0.00     | 1.00 |
| 1375916_at   | protein-L-isospartate (D-aspartate) O-methyltransferase domain containing 2 (predicted)                                            | Pcmtd2_predicted     | 311726        | 1.02             | 0.26                 | 9.8E-01              | 4.6E-04              | 1.00      | 1.00      | 1.00     | 1.00 |
| 1368358_a_at | protein tyrosine phosphatase, receptor type, R                                                                                     | Ptprr                | 94202         | 1.47             | 0.26                 | 2.3E-01              | 8.0E-03              | 1.00      | 1.00      | 1.00     | 1.00 |
| 1374179_at   |                                                                                                                                    |                      | 1.00          | 0.26             | 9.9E-01              | 2.5E-03              | 1.00                 | 1.00      | 1.00      | 1.00     |      |
| 1367572_at   | myosin, light polypeptide 3                                                                                                        | My13                 | 24585         | 0.86             | 0.26                 | 6.7E-01              | 3.8E-03              | 1.00      | 1.00      | 1.00     | 1.00 |
| 1374635_at   | Hypothetical protein LOC689663                                                                                                     | LOC689663            | 689663        | 1.42             | 0.26                 | 3.5E-01              | 6.3E-02              | 0.20      | 0.13      | 0.00     | 0.50 |
| 1367680_at   | acyl-Coenzyme A oxidase 1, palmitoyl                                                                                               | Acox1                | 50681         | 1.00             | 0.26                 | 9.9E-01              | 1.3E-03              | 1.00      | 1.00      | 1.00     | 1.00 |
| 1370865_at   | isocitrate dehydrogenase 3 (NAD), gamma                                                                                            | ldh3g                | 25179         | 0.75             | 0.26                 | 2.9E-01              | 2.2E-03              | 1.00      | 1.00      | 1.00     | 1.00 |
| 1373564_at   | 3-hydroxyisobutyryl-Coenzyme A hydrolase                                                                                           | Hibch                | 301384        | 1.15             | 0.26                 | 7.7E-01              | 9.1E-04              | 1.00      | 1.00      | 1.00     | 1.00 |
| 1371864_at   | Transcribed locus                                                                                                                  |                      | 0.93          | 0.26             | 7.7E-01              | 4.3E-04              | 1.00                 | 1.00      | 1.00      | 1.00     |      |
| 1388692_at   | similar to spermatogenesis associated 11                                                                                           | LOC679944            | 679944        | 0.57             | 0.26                 | 1.0E-01              | 2.8E-03              | 1.00      | 1.00      | 1.00     | 1.00 |
| 1368059_at   | crystallin, mu                                                                                                                     | Crym                 | 117024        | 0.70             | 0.26                 | 2.8E-01              | 4.2E-04              | 1.00      | 1.00      | 1.00     | 1.00 |
| 1372109_at   | Pre-B-cell leukemia transcription factor interacting protein 1                                                                     | Pbixp1               | 310644        | 0.65             | 0.25                 | 3.5E-01              | 4.1E-03              | 1.00      | 1.00      | 1.00     | 1.00 |
| 1376214_at   | Transcribed locus                                                                                                                  |                      | 1.15          | 0.25             | 5.7E-01              | 1.9E-03              | 1.00                 | 1.00      | 1.00      | 1.00     |      |
| 1372248_at   | sestrin 1 (predicted)                                                                                                              | Sesn1_predicted      | 294518        | 0.84             | 0.25                 | 6.3E-01              | 2.5E-03              | 1.00      | 1.00      | 1.00     | 1.00 |
| 1368013_at   | DNA-damage-inducible transcript 4-like                                                                                             | Ddit4l               | 140582        | 0.72             | 0.25                 | 4.8E-01              | 1.2E-02              | 1.00      | 1.00      | 0.00     | 1.00 |
| 1377381_at   | Transcribed locus                                                                                                                  |                      | 0.83          | 0.25             | 5.1E-01              | 2.0E-04              | 1.00                 | 1.00      | 0.90      | 1.00     |      |
| 1388688_at   | Transcribed locus                                                                                                                  |                      | 0.75          | 0.25             | 2.1E-01              | 1.7E-03              | 1.00                 | 1.00      | 1.00      | 1.00     |      |
| 1374160_at   | similar to RIKEN cDNA 1110063G11 (predicted)                                                                                       | RGD1311960_predicted | 305095        | 0.49             | 0.25                 | 4.9E-02              | 3.7E-04              | 1.00      | 1.00      | 1.00     | 1.00 |
| 1371736_at   | hypothetical protein LOC679333                                                                                                     | LOC679333            | 679333        | 0.65             | 0.25                 | 2.3E-01              | 1.3E-03              | 1.00      | 1.00      | 1.00     | 1.00 |
| 1389964_at   | TBC1 domain family, member 19 (predicted)                                                                                          | Tbc1d19_predicted    | 289657        | 0.80             | 0.25                 | 5.4E-01              | 7.4E-03              | 1.00      | 1.00      | 1.00     | 1.00 |
| 1372507_at   | T-cell leukemia translocation altered gene                                                                                         | Teia                 | 306587        | 0.79             | 0.25                 | 5.9E-01              | 1.1E-03              | 1.00      | 1.00      | 0.80     | 1.00 |
| 1390852_x_at | Similar to IQ motif and WD repeats 1 (predicted)                                                                                   | RGD1561961_predicted | 289181        | 1.36             | 0.25                 | 4.2E-01              | 2.7E-03              | 1.00      | 1.00      | 1.00     | 1.00 |
| 1389015_at   | similar to FUN14 domain containing 2 (predicted)                                                                                   | RGD1560916_predicted | 361288        | 0.56             | 0.25                 | 2.1E-02              | 9.8E-04              | 1.00      | 1.00      | 1.00     | 1.00 |
| 1372639_at   | triptartite motif-containing 54                                                                                                    | Trim54               | 362708        | 1.59             | 0.25                 | 1.8E-01              | 6.0E-03              | 1.00      | 1.00      | 1.00     | 1.00 |
| 1371041_at   | NADH dehydrogenase (ubiquinone) flavoprotein 2                                                                                     | Ndufv2               | 81728         | 0.85             | 0.25                 | 5.6E-01              | 1.3E-03              | 1.00      | 1.00      | 1.00     | 1.00 |
| 1398343_at   | similar to Dnaj (Hsp40) homolog, subfamily A, member 4                                                                             | Ndufv2               | 498996        | 0.89             | 0.25                 | 5.8E-01              | 5.7E-04              | 1.00      | 1.00      | 1.00     | 1.00 |
| 1377773_at   | Transcribed locus, weakly similar to NP_766020.1 cDNA C030002O17 [Mus musculus]                                                    |                      | 0.65          | 0.25             | 4.5E-01              | 4.6E-02              | 0.40                 | 0.50      | 0.00      | 0.50     |      |
| 1374515_at   | similar to RIKEN cDNA 6330409N04                                                                                                   | RGD1306437           | 290303        | 0.82             | 0.25                 | 6.0E-01              | 1.3E-03              | 1.00      | 1.00      | 1.00     | 1.00 |
| 1368618_at   | growth factor receptor bound protein 14                                                                                            | Grb14                | 58844         | 1.16             | 0.25                 | 6.3E-01              | 6.7E-04              | 1.00      | 1.00      | 1.00     | 1.00 |
| 1389966_at   | procollagen, type VI, alpha 3 (predicted)                                                                                          | Col6a3_predicted     | 367313        | 1.10             | 0.25                 | 8.0E-01              | 4.8E-02              | 1.00      | 1.00      | 1.00     | 1.00 |
| 1387039_at   | glypican 1                                                                                                                         | Gpc1                 | 58920         | 0.98             | 0.25                 | 9.4E-01              | 3.3E-04              | 1.00      | 1.00      | 1.00     | 1.00 |
| 1389572_at   | malic enzyme 3, NADP(+)-dependent, mitochondrial (predicted)                                                                       | Me3_predicted        | 361602        | 1.03             | 0.25                 | 9.3E-01              | 2.5E-03              | 1.00      | 1.00      | 0.80     | 1.00 |
| 1376194_at   | Transcribed locus                                                                                                                  |                      | 1.21          | 0.25             | 7.1E-01              | 1.1E-03              | 1.00                 | 0.88      | 1.00      | 1.00     |      |
| 1373186_at   | similar to RIKEN cDNA 5033405K12 (predicted)                                                                                       |                      | 0.80          | 0.25             | 3.2E-01              | 1.1E-03              | 1.00                 | 1.00      | 1.00      | 1.00     |      |
| 1374726_at   | fibronectin type III domain containing 1                                                                                           | Fndc1                | 308099        | 1.07             | 0.25                 | 9.2E-01              | 2.0E-02              | 0.00      | 0.25      | 0.20     | 1.00 |
| 1388447_at   | similar to limb-bud and heart                                                                                                      | LOC683626            | 683626        | 1.00             | 0.25                 | 9.9E-01              | 3.9E-04              | 1.00      | 1.00      | 1.00     | 1.00 |
| 1388194_at   | dihydropyrimidine S-acetyltransferase (E2 component of pyruvate dehydrogenase complex)                                             | Diat                 | 81654         | 1.24             | 0.25                 | 2.9E-01              | 3.2E-03              | 1.00      | 1.00      | 1.00     | 1.00 |
| 1373659_at   | hypothetical protein LOC688257                                                                                                     | LOC688257            | 688257        | 1.23             | 0.25                 | 7.7E-01              | 5.7E-03              | 1.00      | 1.00      | 0.00     | 1.00 |
| 1373312_at   | Transcribed locus                                                                                                                  |                      | 0.77          | 0.25             | 6.5E-01              | 1.1E-02              | 1.00                 | 1.00      | 0.00      | 1.00     |      |
| 1372583_at   | Transcribed locus                                                                                                                  |                      | 1.38          | 0.25             | 4.0E-01              | 8.1E-04              | 1.00                 | 1.00      | 1.00      | 1.00     |      |
| 1368827_at   | GATA binding protein 6                                                                                                             | Gata6                | 29300         | 1.24             | 0.25                 | 2.9E-01              | 2.0E-04              | 1.00      | 1.00      | 0.00     | 1.00 |

| Probe Set ID | Gene Title                                                                                                                           | Gene Symbol          | Entrez Gene ID | Fold Change   |                  | False Discovery Rate |                      | Average Present Call |           |           |          |
|--------------|--------------------------------------------------------------------------------------------------------------------------------------|----------------------|----------------|---------------|------------------|----------------------|----------------------|----------------------|-----------|-----------|----------|
|              |                                                                                                                                      |                      |                | Strain Effect | Rejection Effect | Native BN / DA       | Allograft / Isograft | Native BN            | Native DA | Allograft | Isograft |
| 1368064_a_at | dopa decarboxylase                                                                                                                   | Ddc                  | 24311          | 1.17          | 0.25             | 6.2E-01              | 1.1E-03              | 1.00                 | 1.00      | 0.60      | 1.00     |
| 1373790_at   |                                                                                                                                      |                      |                | 0.87          | 0.25             | 7.6E-01              | 2.9E-03              | 1.00                 | 1.00      | 0.00      | 1.00     |
| 1380854_at   | R3H domain containing 1                                                                                                              | R3hdm1               | 304763         | 0.99          | 0.24             | 9.9E-01              | 1.0E-03              | 1.00                 | 1.00      | 1.00      | 1.00     |
| 1371995_at   | kelch-like 21 (Drosophila) (predicted)                                                                                               | Kihl21_predicted     | 313743         | 1.07          | 0.24             | 8.6E-01              | 1.5E-02              | 1.00                 | 0.88      | 0.00      | 1.00     |
| 1370541_at   | nuclear receptor subfamily 1, group D, member 2                                                                                      | Nr1d2                | 259241         | 1.06          | 0.24             | 9.2E-01              | 8.6E-03              | 1.00                 | 1.00      | 1.00      | 1.00     |
| 1388902_at   | lysyl oxidase-like 1                                                                                                                 | Lox1l                | 315714         | 0.23          | 0.24             | 2.5E-01              | 2.4E-02              | 0.00                 | 0.00      | 0.30      | 1.00     |
| 1377563_at   | similar to leiomodin 3 (fetal) (predicted)                                                                                           | RGD1564924_predicted | 500267         | 1.33          | 0.24             | 4.7E-01              | 8.8E-04              | 1.00                 | 1.00      | 0.00      | 1.00     |
| 1372084_at   | protein tyrosine phosphatase 4a3 (predicted)                                                                                         | Ptp4a3_predicted     | 362930         | 1.13          | 0.24             | 7.0E-01              | 1.1E-03              | 1.00                 | 1.00      | 1.00      | 1.00     |
| 1374705_at   | collagen, type IV, alpha 5 (predicted)                                                                                               | Col4a5_predicted     | 363457         | 0.97          | 0.24             | 9.7E-01              | 1.7E-04              | 1.00                 | 1.00      | 1.00      | 1.00     |
| 1370312_at   | spondin 1                                                                                                                            | Spon1                | 64456          | 2.40          | 0.24             | 5.2E-02              | 1.0E-02              | 1.00                 | 1.00      | 1.00      | 1.00     |
| 1368132_at   | transducer of ErbB-2.1                                                                                                               | Tob1                 | 170842         | 0.86          | 0.24             | 6.2E-01              | 1.3E-03              | 1.00                 | 1.00      | 1.00      | 1.00     |
| 1376672_at   | Transcribed locus                                                                                                                    |                      |                | 1.19          | 0.24             | 4.5E-01              | 5.8E-04              | 1.00                 | 1.00      | 1.00      | 1.00     |
| 1373278_at   | nuclear factor, erythroid derived 2,-like 1 (predicted)                                                                              | Nfe2l1_predicted     | 360610         | 0.37          | 0.24             | 3.1E-03              | 5.2E-04              | 1.00                 | 1.00      | 1.00      | 1.00     |
| 1372727_at   | Transcribed locus                                                                                                                    |                      |                | 0.86          | 0.24             | 6.8E-01              | 5.3E-04              | 1.00                 | 1.00      | 1.00      | 1.00     |
| 1374235_at   | Down syndrome critical region gene 1-like 1                                                                                          | Dscr11               | 140666         | 0.87          | 0.24             | 7.2E-01              | 1.3E-03              | 1.00                 | 1.00      | 0.10      | 1.00     |
| 1390430_at   | Nuclear receptor subfamily 1, group D, member 2                                                                                      | Nr1d2                | 259241         | 0.75          | 0.24             | 3.3E-01              | 1.3E-03              | 1.00                 | 1.00      | 1.00      | 1.00     |
| 1367694_at   | hydroxyacyl-Coenzyme A dehydrogenase/3-ketoacyl-Coenzyme A thiolase/enoyl-Coenzyme A hydratase (trifunctional protein), beta subunit | Hadhb                | 171155         | 0.85          | 0.24             | 5.2E-01              | 9.3E-04              | 1.00                 | 1.00      | 1.00      | 1.00     |
| 1377423_at   | Transcribed locus                                                                                                                    |                      |                | 0.86          | 0.24             | 6.6E-01              | 1.9E-02              | 0.90                 | 0.63      | 0.20      | 1.00     |
| 1370258_at   | basic leucine zipper and W2 domains 2                                                                                                | Bzw2                 | 171439         | 0.80          | 0.24             | 5.4E-01              | 2.2E-04              | 1.00                 | 1.00      | 1.00      | 1.00     |
| 1373016_at   | dihydropyrimidine dehydrogenase                                                                                                      | Dhl                  | 298942         | 0.94          | 0.24             | 9.3E-01              | 1.0E-03              | 1.00                 | 1.00      | 1.00      | 1.00     |
| 1374218_at   | similar to IQ motif and Sec7 domain 2                                                                                                | LOC683475            | 683475         | 0.87          | 0.24             | 6.8E-01              | 1.4E-03              | 1.00                 | 1.00      | 1.00      | 1.00     |
| 1368892_at   | CAP, adenylate cyclase-associated protein, 2 (yeast)                                                                                 | Cap2                 | 116653         | 1.03          | 0.24             | 9.3E-01              | 4.6E-03              | 1.00                 | 1.00      | 0.60      | 1.00     |
| 1368114_at   | fibroblast growth factor 13                                                                                                          | Fgf13                | 84488          | 0.96          | 0.24             | 8.8E-01              | 8.8E-04              | 1.00                 | 1.00      | 1.00      | 1.00     |
| 1387669_a_at | epoxide hydrolase 1, microsomal                                                                                                      | Ephx1                | 25315          | 0.83          | 0.24             | 4.8E-01              | 3.7E-03              | 0.60                 | 1.00      | 0.00      | 1.00     |
| 1387795_at   | polymerase (DNA directed), alpha 2                                                                                                   | Pola2                | 85242          | 1.39          | 0.24             | 3.6E-01              | 2.7E-02              | 1.00                 | 1.00      | 0.00      | 0.75     |
| 1370389_at   | glycoprotein m6b                                                                                                                     | Gpm6b                | 192179         | 1.40          | 0.24             | 4.9E-01              | 4.2E-02              | 0.60                 | 0.50      | 0.20      | 1.00     |
| 1367687_a_at | peptidylglycine alpha-amidating monooxygenase                                                                                        | Pam                  | 25508          | 0.95          | 0.24             | 8.2E-01              | 4.1E-03              | 1.00                 | 1.00      | 1.00      | 1.00     |
| 1371414_at   | gelsoin                                                                                                                              | Gsn                  | 296654         | 1.14          | 0.24             | 7.1E-01              | 3.7E-04              | 1.00                 | 1.00      | 1.00      | 1.00     |
| 1389521_at   | Transcribed locus, strongly similar to NP_445868.1 perinuclear RNA-binding protein [Rattus norvegicus]                               | Mnab_predicted       | 311909         | 0.86          | 0.24             | 5.4E-01              | 4.9E-04              | 1.00                 | 1.00      | 1.00      | 1.00     |
| 1373212_at   | mitochondrial ATP synthase regulatory component factor B                                                                             | Atp5b                | 362749         | 0.76          | 0.24             | 2.9E-01              | 2.4E-03              | 1.00                 | 1.00      | 0.20      | 1.00     |
| 1389376_at   | Transcribed locus                                                                                                                    |                      |                | 0.97          | 0.24             | 9.3E-01              | 3.7E-04              | 1.00                 | 1.00      | 0.80      | 1.00     |
| 1369949_at   | basal cell adhesion molecule                                                                                                         | Beam                 | 78958          | 0.99          | 0.24             | 9.9E-01              | 8.0E-04              | 1.00                 | 1.00      | 0.00      | 1.00     |
| 1373371_a_at | similar to RIKEN cDNA 1110001J03                                                                                                     | MGC112899            | 500087         | 0.66          | 0.24             | 2.1E-01              | 1.5E-03              | 1.00                 | 1.00      | 1.00      | 1.00     |
| 1375223_at   |                                                                                                                                      |                      |                | 0.74          | 0.24             | 5.3E-01              | 2.4E-02              | 1.00                 | 1.00      | 0.20      | 1.00     |
| 1372925_at   | sirtuin 3 (silent mating type information regulation 2, homolog 3 (S. cerevisiae)) (predicted)                                       | Sirt3_predicted      | 293615         | 0.87          | 0.23             | 3.5E-01              | 1.4E-03              | 1.00                 | 1.00      | 0.60      | 1.00     |
| 1370814_at   | dehydrogenase/reductase (SDR family) member 4                                                                                        | Dhrs4                | 266686         | 0.95          | 0.23             | 8.2E-01              | 3.7E-04              | 1.00                 | 1.00      | 1.00      | 1.00     |
| 1372695_at   | Fibronectin type III domain containing 5                                                                                             | Fndc5                | 260327         | 0.84          | 0.23             | 2.6E-01              | 2.0E-03              | 1.00                 | 1.00      | 1.00      | 1.00     |
| 1371954_at   | tensin                                                                                                                               | Tns                  | 29136          | 1.07          | 0.23             | 8.3E-01              | 1.9E-03              | 1.00                 | 1.00      | 1.00      | 1.00     |
| 1376498_at   | similar to 2900002H16Rik protein (predicted)                                                                                         | RGD1307973_predicted | 304469         | 0.76          | 0.23             | 5.3E-02              | 1.2E-03              | 1.00                 | 1.00      | 1.00      | 1.00     |
| 1367813_at   | protein phosphatase 1, regulatory (inhibitor) subunit 14A                                                                            | Ppp1r14a             | 114004         | 1.07          | 0.23             | 8.5E-01              | 9.2E-02              | 0.20                 | 0.00      | 0.10      | 1.00     |
| 1372044_at   | similar to Ser-Thr-rich protein T10 in DGCR region (predicted)                                                                       | RGD1310348_predicted | 360738         | 0.82          | 0.23             | 6.2E-01              | 1.0E-03              | 1.00                 | 1.00      | 1.00      | 1.00     |
| 1375297_at   | similar to RIKEN cDNA 0610008C08 (predicted)                                                                                         | RGD1565289_predicted | 363474         | 1.09          | 0.23             | 8.6E-01              | 6.3E-04              | 1.00                 | 1.00      | 1.00      | 1.00     |
| 1370656_a_at | homer homolog 1 (Drosophila)                                                                                                         | Homer1               | 29546          | 1.03          | 0.23             | 9.6E-01              | 3.5E-02              | 0.80                 | 0.50      | 0.00      | 0.50     |
| 1372864_at   | Transcribed locus                                                                                                                    |                      |                | 0.85          | 0.23             | 5.9E-01              | 5.0E-04              | 1.00                 | 1.00      | 1.00      | 1.00     |
| 1375092_at   | Transcribed locus, moderately similar to XP_620246.2 myosin XVIIIb [Mus musculus]                                                    |                      |                | 0.92          | 0.23             | 8.9E-01              | 7.4E-04              | 1.00                 | 1.00      | 0.10      | 1.00     |
| 1398396_at   | Transcribed locus                                                                                                                    |                      |                | 0.91          | 0.23             | 6.6E-01              | 1.3E-02              | 0.20                 | 0.50      | 0.00      | 1.00     |
| 1372856_at   | Transcribed locus                                                                                                                    |                      |                | 1.46          | 0.23             | 1.1E-01              | 1.6E-03              | 1.00                 | 1.00      | 0.60      | 1.00     |
| 1368154_at   | guanylate cyclase 1, soluble, alpha 3                                                                                                | Gucyl1a3             | 497757         | 1.02          | 0.23             | 9.7E-01              | 4.0E-03              | 0.40                 | 0.38      | 0.00      | 1.00     |
| 1389020_at   | similar to immunoglobulin superfamily containing leucine-rich repeat                                                                 | LOC686539            | 686539         | 0.64          | 0.23             | 2.8E-01              | 3.7E-04              | 1.00                 | 1.00      | 1.00      | 1.00     |
| 1368574_at   | adrenergic receptor, alpha 1b                                                                                                        | Adra1b               | 24173          | 0.46          | 0.23             | 1.1E-01              | 2.7E-03              | 1.00                 | 1.00      | 1.00      | 1.00     |
| 1390449_at   | CDNA clone IMAGE:7309127                                                                                                             |                      |                | 1.46          | 0.23             | 2.4E-01              | 1.2E-03              | 1.00                 | 1.00      | 1.00      | 1.00     |
| 1372168_s_at | insulin-like growth factor binding protein 6                                                                                         | Igfbp6               | 25641          | 0.49          | 0.23             | 1.0E-01              | 2.4E-03              | 0.80                 | 1.00      | 0.70      | 1.00     |
| 1389543_at   | mannan-binding lectin serine peptidase 1                                                                                             | Masp1                | 64023          | 1.04          | 0.23             | 9.3E-01              | 6.7E-04              | 1.00                 | 1.00      | 1.00      | 1.00     |
| 1376170_at   |                                                                                                                                      |                      |                | 0.92          | 0.23             | 9.0E-01              | 2.0E-02              | 0.00                 | 0.25      | 0.00      | 1.00     |
| 1371253_at   | electron transferring flavoprotein, alpha polypeptide                                                                                | Erf1a                | 300726         | 0.84          | 0.23             | 4.8E-01              | 4.6E-04              | 1.00                 | 1.00      | 1.00      | 1.00     |
| 1370342_at   | potassium channel, subfamily K, member 2                                                                                             | Kenk2                | 170899         | 0.37          | 0.23             | 5.3E-02              | 1.9E-03              | 1.00                 | 1.00      | 0.00      | 1.00     |
| 1388143_at   | tensin XA                                                                                                                            | Tnsx                 | 25602          | 1.51          | 0.23             | 3.1E-01              | 2.8E-03              | 1.00                 | 1.00      | 0.30      | 1.00     |
| 1374039_at   | lchyl homolog E3 ubiquitin protein ligase (mouse)                                                                                    | Lch                  | 311567         | 0.77          | 0.23             | 5.0E-01              | 1.5E-03              | 1.00                 | 1.00      | 0.00      | 1.00     |
| 1388804_at   | Transcribed locus                                                                                                                    |                      |                | 1.37          | 0.23             | 4.8E-01              | 6.2E-02              | 0.70                 | 0.50      | 0.00      | 1.00     |
| 1372199_at   | PTEN induced putative kinase 1 (predicted)                                                                                           | Pink1_predicted      | 298575         | 0.94          | 0.23             | 7.6E-01              | 1.3E-03              | 1.00                 | 1.00      | 1.00      | 1.00     |
| 1368429_at   | TAF9-like RNA polymerase II, TATA box binding protein (TBP)-associated factor, 31kDa                                                 | Taf9l                | 171152         | 1.07          | 0.23             | 9.2E-01              | 1.9E-03              | 1.00                 | 0.75      | 0.30      | 1.00     |
| 1372289_at   | similar to solute carrier family 25 (mitochondrial carrier, Aralar), member 12 (predicted)                                           | RGD1561141_predicted | 311122         | 0.82          | 0.23             | 3.3E-01              | 3.7E-04              | 1.00                 | 1.00      | 1.00      | 1.00     |
| 1390420_at   | carboxypeptidase X 1 (M14 family) (predicted)                                                                                        | Cpxm1_predicted      | 296156         | 0.79          | 0.23             | 5.3E-01              | 2.0E-03              | 0.00                 | 0.25      | 0.00      | 1.00     |
| 1372720_at   | BTB (POZ) domain containing 1                                                                                                        | Btb1                 | 293060         | 0.73          | 0.23             | 5.2E-02              | 5.5E-04              | 1.00                 | 1.00      | 1.00      | 1.00     |
| 1377060_at   | methylcrotonoyl-Coenzyme A carboxylase 2 (beta)                                                                                      | Mccc2                | 361884         | 1.01          | 0.23             | 9.6E-01              | 1.7E-03              | 1.00                 | 1.00      | 1.00      | 1.00     |
| 1369674_at   | purinergic receptor P2X, ligand-gated ion channel, 5                                                                                 | P2rx5                | 113995         | 0.99          | 0.23             | 9.9E-01              | 6.9E-04              | 1.00                 | 1.00      | 1.00      | 1.00     |
| 1370165_at   | small muscle protein, X-linked                                                                                                       | Smpx                 | 84416          | 0.92          | 0.23             | 8.4E-01              | 1.1E-02              | 1.00                 | 1.00      | 1.00      | 1.00     |
| 1372979_at   | Transcribed locus                                                                                                                    |                      |                | 1.06          | 0.23             | 8.0E-01              | 5.8E-03              | 1.00                 | 1.00      | 1.00      | 1.00     |
| 1374352_at   | actin alpha cardiac 1                                                                                                                | Act1                 | 29275          | 0.94          | 0.22             | 8.3E-01              | 1.1E-02              | 1.00                 | 1.00      | 1.00      | 1.00     |
| 1386914_at   | guanosine monophosphate reductase                                                                                                    | Gmpr                 | 117533         | 0.95          | 0.22             | 9.0E-01              | 8.9E-04              | 1.00                 | 1.00      | 1.00      | 1.00     |
| 1389386_at   |                                                                                                                                      |                      |                | 0.82          | 0.22             | 5.5E-01              | 3.2E-04              | 1.00                 | 1.00      | 0.60      | 1.00     |
| 1376912_at   | hypothetical LOC287388 (predicted)                                                                                                   | RGD1310324_predicted | 287388         | 0.84          | 0.22             | 5.1E-01              | 3.5E-02              | 1.00                 | 1.00      | 0.40      | 1.00     |
| 1379936_at   | Tropomyosin 1, alpha                                                                                                                 | Tpm1                 | 24851          | 1.26          | 0.22             | 6.6E-01              | 4.1E-02              | 1.00                 | 0.88      | 0.20      | 1.00     |
| 1389704_at   | Transcribed locus                                                                                                                    |                      |                | 1.26          | 0.22             | 2.0E-01              | 3.9E-04              | 1.00                 | 1.00      | 0.00      | 1.00     |
| 1384309_at   | Transcribed locus                                                                                                                    |                      |                | 1.00          | 0.22             | 1.0E+00              | 1.8E-03              | 1.00                 | 1.00      | 0.20      | 1.00     |
| 1368772_at   | solute carrier family 4, member 3                                                                                                    | Slc4a3               | 24781          | 0.81          | 0.22             | 2.8E-01              | 5.2E-05              | 1.00                 | 1.00      | 1.00      | 1.00     |
| 1368440_at   | solute carrier family 3, member 1                                                                                                    | Slc3a1               | 29484          | 0.16          | 0.22             | 1.7E-01              | 8.6E-04              | 0.00                 | 1.00      | 0.60      | 1.00     |

| Probe Set ID | Gene Title                                                                              | Gene Symbol          | Entrez Gene ID | Strain Effect  |                      | Fold Change    |                      | Rejection Effect |           | False Discovery Rate |          | Average Present Call |  |  |
|--------------|-----------------------------------------------------------------------------------------|----------------------|----------------|----------------|----------------------|----------------|----------------------|------------------|-----------|----------------------|----------|----------------------|--|--|
|              |                                                                                         |                      |                | Native BN / DA | Allograft / Isograft | Native BN / DA | Allograft / Isograft | Native BN        | Native DA | Allograft            | Isograft |                      |  |  |
| 1377448_at   | transmembrane protein 38a (predicted)                                                   | Tmem38a_predicted    | 306327         | 1.03           | 0.22                 | 9.6E-01        | 3.5E-02              | 1.00             | 1.00      | 0.00                 | 0.75     |                      |  |  |
| 1388617_at   | biphenyl hydrolase-like (serine hydrolase, breast epithelial mucin-associated antigen)  | Bphl                 | 361239         | 0.54           | 0.22                 | 1.5E-01        | 7.3E-03              | 1.00             | 1.00      | 0.10                 | 1.00     |                      |  |  |
| 1368673_at   | discoidin domain receptor family, member 2                                              | Ddr2                 | 83573          | 1.60           | 0.22                 | 7.0E-01        | 2.5E-02              | 0.00             | 0.00      | 0.00                 | 0.88     |                      |  |  |
| 1386921_at   | carboxypeptidase E                                                                      | Cpe                  | 25669          | 0.80           | 0.22                 | 4.5E-01        | 7.3E-03              | 1.00             | 1.00      | 1.00                 | 1.00     |                      |  |  |
| 1370981_at   | retinoid X receptor gamma                                                               | Rxrg                 | 83574          | 0.94           | 0.22                 | 8.6E-01        | 4.6E-04              | 1.00             | 1.00      | 0.20                 | 1.00     |                      |  |  |
| 1375549_at   | Transcribed locus                                                                       |                      |                | 0.71           | 0.22                 | 4.8E-01        | 1.8E-03              | 1.00             | 1.00      | 0.00                 | 1.00     |                      |  |  |
| 1386880_at   | acetyl-Coenzyme A acyltransferase 2 (mitochondrial 3-oxoacetyl-Coenzyme A thiolase)     | Acat2                | 170465         | 0.81           | 0.22                 | 7.0E-01        | 1.3E-03              | 1.00             | 1.00      | 1.00                 | 1.00     |                      |  |  |
| 1388305_at   | v-rat murine sarcoma 3611 viral oncogene homolog                                        | Araf                 | 64363          | 0.71           | 0.22                 | 5.8E-01        | 4.1E-04              | 1.00             | 1.00      | 1.00                 | 1.00     |                      |  |  |
| 1387370_at   | tropomodulin 1                                                                          | Tmod1                | 25566          | 1.51           | 0.22                 | 2.1E-01        | 3.1E-03              | 1.00             | 1.00      | 0.50                 | 1.00     |                      |  |  |
| 1367913_at   | cytoglobin                                                                              | Cygb                 | 170520         | 1.04           | 0.22                 | 9.4E-01        | 2.1E-03              | 1.00             | 1.00      | 0.70                 | 1.00     |                      |  |  |
| 1388423_at   | hypothetical protein MGC:15854                                                          | RGD1302996           | 294231         | 0.88           | 0.22                 | 6.5E-01        | 2.8E-03              | 1.00             | 1.00      | 1.00                 | 1.00     |                      |  |  |
| 1368642_at   | cadherin 2                                                                              | Cdh2                 | 83501          | 0.99           | 0.22                 | 9.9E-01        | 1.7E-03              | 1.00             | 1.00      | 1.00                 | 1.00     |                      |  |  |
| 1384466_at   | notch1-induced protein                                                                  | LOC493574            | 493574         | 1.15           | 0.22                 | 7.8E-01        | 4.8E-04              | 1.00             | 1.00      | 1.00                 | 1.00     |                      |  |  |
| 1387814_at   | caveolin 3                                                                              | Cav3                 | 29161          | 1.04           | 0.22                 | 9.3E-01        | 1.1E-02              | 1.00             | 1.00      | 0.50                 | 1.00     |                      |  |  |
| 1373178_at   | Transcribed locus                                                                       |                      |                | 1.28           | 0.22                 | 4.9E-01        | 5.9E-04              | 1.00             | 1.00      | 0.50                 | 1.00     |                      |  |  |
| 1389334_at   | NADH dehydrogenase (ubiquinone) 1 alpha subcomplex 10                                   | Ndufa10              | 314071         | 0.58           | 0.22                 | 6.9E-02        | 2.7E-03              | 1.00             | 1.00      | 1.00                 | 1.00     |                      |  |  |
| 1368317_at   | aquaporin 7                                                                             | Aqp7                 | 29171          | 0.51           | 0.22                 | 1.2E-01        | 9.9E-04              | 1.00             | 1.00      | 1.00                 | 1.00     |                      |  |  |
| 1377266_at   | Transcribed locus                                                                       |                      |                |                |                      | 9.5E-01        | 2.6E-03              | 0.40             | 0.13      | 0.00                 | 0.75     |                      |  |  |
| 1388471_at   | -complex 11 (mouse) like 2                                                              | Tsp112               | 314683         | 1.35           | 0.22                 | 2.4E-01        | 6.7E-04              | 1.00             | 1.00      | 1.00                 | 1.00     |                      |  |  |
| 1388364_at   | NADH dehydrogenase (ubiquinone) Fe-S protein 3 (predicted)                              | Ndufs3_predicted     | 295923         | 0.75           | 0.22                 | 3.6E-01        | 1.1E-03              | 1.00             | 1.00      | 1.00                 | 1.00     |                      |  |  |
| 1387018_at   | Arg/Abi-interacting protein ArgBP2                                                      | Argbp2               | 114901         | 1.03           | 0.22                 | 8.6E-01        | 7.2E-03              | 1.00             | 1.00      | 1.00                 | 1.00     |                      |  |  |
| 1389256_at   | Transcribed locus                                                                       |                      |                | 1.44           | 0.22                 | 7.4E-02        | 4.0E-04              | 1.00             | 1.00      | 1.00                 | 1.00     |                      |  |  |
| 1370419_a_at | SH3-domain kinase binding protein 1                                                     | Sh3kbp1              | 84357          | 0.89           | 0.22                 | 7.8E-01        | 3.7E-04              | 1.00             | 1.00      | 1.00                 | 1.00     |                      |  |  |
| 1377452_at   | Transcribed locus                                                                       |                      |                | 1.99           | 0.21                 | 1.4E-01        | 6.1E-02              | 0.60             | 0.00      | 0.00                 | 0.75     |                      |  |  |
| 1368700_at   | phospholipase C-like 1                                                                  | Plcl1                | 84587          | 1.00           | 0.21                 | 9.9E-01        | 2.9E-02              | 0.20             | 0.50      | 0.10                 | 0.75     |                      |  |  |
| 1389423_at   | Discoidin domain receptor family, member 2                                              | Ddr2                 | 83573          | 1.22           | 0.21                 | 5.9E-01        | 7.8E-03              | 1.00             | 1.00      | 1.00                 | 1.00     |                      |  |  |
| 1369926_at   | glutathione peroxidase 3                                                                | Gpx3                 | 64317          | 1.27           | 0.21                 | 5.7E-01        | 8.6E-03              | 1.00             | 1.00      | 1.00                 | 1.00     |                      |  |  |
| 1375698_at   | Transcribed locus                                                                       |                      |                | 0.75           | 0.21                 | 3.6E-01        | 6.2E-04              | 1.00             | 1.00      | 0.00                 | 1.00     |                      |  |  |
| 1390339_at   | Transcribed locus                                                                       |                      |                | 0.97           | 0.21                 | 9.3E-01        | 9.3E-04              | 1.00             | 1.00      | 1.00                 | 1.00     |                      |  |  |
| 1372736_at   | amylase-1, 6-glucosidase, 4-alpha-glucanotransferase                                    | Agl_predicted        | 362029         | 1.12           | 0.21                 | 7.1E-01        | 3.7E-04              | 1.00             | 1.00      | 1.00                 | 1.00     |                      |  |  |
| 1374062_x_at | microtubule-associated protein, RPB family, member 3                                    | Mapr3                | 298848         | 0.87           | 0.21                 | 5.7E-01        | 7.2E-04              | 1.00             | 1.00      | 0.40                 | 1.00     |                      |  |  |
| 1398354_at   | catenin (cadherin associated protein), alpha-like 1 (predicted)                         | Ctnna1_predicted     | 298019         | 0.71           | 0.21                 | 2.3E-01        | 2.7E-03              | 1.00             | 1.00      | 0.80                 | 1.00     |                      |  |  |
| 1373810_at   | phospholipase A2, group X1A (predicted)                                                 | Pla2g12a_predicted   | 362039         | 0.46           | 0.21                 | 5.9E-02        | 5.3E-02              | 1.00             | 1.00      | 0.00                 | 0.75     |                      |  |  |
| 1376441_at   | similar to RIKEN cDNA 1810048J11 (predicted)                                            | RGD1305147_predicted | 314219         | 0.66           | 0.21                 | 4.1E-01        | 1.2E-03              | 0.80             | 1.00      | 0.00                 | 1.00     |                      |  |  |
| 1367735_at   | acetyl-Coenzyme A dehydrogenase, long-chain                                             | Acatd                | 25287          | 0.90           | 0.21                 | 6.6E-01        | 1.1E-03              | 1.00             | 1.00      | 1.00                 | 1.00     |                      |  |  |
| 1369876_at   | guanine nucleotide binding protein, beta 3                                              | Gnb3                 | 60449          | 0.98           | 0.21                 | 9.7E-01        | 1.4E-03              | 1.00             | 1.00      | 0.30                 | 1.00     |                      |  |  |
| 1372266_at   | REV3-like, catalytic subunit of DNA polymerase zeta RAD54 like (S. cerevisiae)          | Rev3l                | 309812         | 0.82           | 0.21                 | 6.4E-01        | 1.0E-03              | 1.00             | 1.00      | 1.00                 | 1.00     |                      |  |  |
| 1390130_at   | Transcribed locus                                                                       |                      |                | 1.02           | 0.21                 | 9.6E-01        | 4.9E-04              | 1.00             | 1.00      | 1.00                 | 1.00     |                      |  |  |
| 1373921_at   | similar to enoyl Coenzyme A hydratase domain containing 3                               | LOC684538            | 684538         | 0.95           | 0.21                 | 9.6E-01        | 2.3E-03              | 1.00             | 1.00      | 0.50                 | 1.00     |                      |  |  |
| 1369065_a_at | ATPase, Ca++ transporting, cardiac muscle, slow twitch 2                                | Atp2a2               | 29693          | 0.89           | 0.21                 | 7.1E-01        | 4.1E-03              | 1.00             | 1.00      | 1.00                 | 1.00     |                      |  |  |
| 1371412_a_at | Neuronal regeneration related protein                                                   | Nrep                 | 338475         | 0.68           | 0.21                 | 4.4E-01        | 6.5E-04              | 1.00             | 1.00      | 1.00                 | 1.00     |                      |  |  |
| 1370678_s_at | monoamine oxidase A                                                                     | Maoa                 | 29253          | 1.28           | 0.21                 | 5.8E-01        | 1.2E-03              | 1.00             | 1.00      | 1.00                 | 1.00     |                      |  |  |
| 1374353_x_at | actin alpha cardiac 1                                                                   | Actc1                | 29275          | 1.04           | 0.21                 | 9.0E-01        | 1.0E-02              | 1.00             | 1.00      | 1.00                 | 1.00     |                      |  |  |
| 1388133_at   | cold shock domain containing C2, RNA binding                                            | Cskc2                | 266600         | 0.79           | 0.21                 | 3.8E-01        | 7.5E-04              | 1.00             | 1.00      | 0.00                 | 1.00     |                      |  |  |
| 1387197_at   | osteomodulin                                                                            | Omd                  | 83717          | 0.87           | 0.21                 | 7.4E-01        | 1.7E-03              | 0.80             | 1.00      | 0.20                 | 1.00     |                      |  |  |
| 1370301_at   | matrix metalloproteinase 2                                                              | Mmp2                 | 81866          | 1.23           | 0.21                 | 6.0E-01        | 4.4E-02              | 1.00             | 1.00      | 1.00                 | 1.00     |                      |  |  |
| 1377808_at   | Similar to IQ motif and WD repeats 1 (predicted)                                        | RGD1561961_predicted | 289181         | 1.38           | 0.21                 | 4.1E-01        | 5.9E-03              | 1.00             | 1.00      | 1.00                 | 1.00     |                      |  |  |
| 1389179_at   | cell death-inducing DNA fragmentation factor, alpha subunit-like effector A (predicted) | Cidea_predicted      | 291541         | 0.82           | 0.21                 | 5.8E-01        | 4.8E-04              | 1.00             | 1.00      | 1.00                 | 1.00     |                      |  |  |
| 1370018_at   | heat shock 27kDa protein 2                                                              | Hspb2                | 161476         | 0.85           | 0.21                 | 4.8E-01        | 2.2E-02              | 1.00             | 1.00      | 0.90                 | 1.00     |                      |  |  |
| 1370328_at   | dickkopf homolog 3 (Xenopus laevis)                                                     | Dkk3                 | 171548         | 1.30           | 0.20                 | 5.2E-01        | 1.8E-03              | 1.00             | 1.00      | 0.20                 | 1.00     |                      |  |  |
| 1398326_at   | similar to Nur77 downstream protein 2                                                   | MGC105647            | 361824         | 0.84           | 0.20                 | 5.6E-01        | 2.5E-03              | 1.00             | 1.00      | 1.00                 | 1.00     |                      |  |  |
| 1374389_at   | guanylate cyclase 1, soluble, beta 3                                                    | Gucylb3              | 25202          | 0.76           | 0.20                 | 5.4E-01        | 6.8E-02              | 0.50             | 0.25      | 0.20                 | 0.88     |                      |  |  |
| 1371886_at   | carnitine acetyltransferase                                                             | Crat                 | 311849         | 0.63           | 0.20                 | 8.4E-02        | 3.4E-03              | 1.00             | 1.00      | 1.00                 | 1.00     |                      |  |  |
| 1376015_at   |                                                                                         |                      |                | 1.14           | 0.20                 | 5.9E-01        | 2.0E-02              | 1.00             | 1.00      | 0.20                 | 1.00     |                      |  |  |
| 1371609_at   | homolog of zebrafish ES1                                                                | RGD1303003           | 294326         | 0.86           | 0.20                 | 5.1E-01        | 1.6E-03              | 1.00             | 1.00      | 1.00                 | 1.00     |                      |  |  |
| 1387957_a_at | SH3-domain kinase binding protein 1                                                     | Sh3kbp1              | 84357          | 1.02           | 0.20                 | 9.7E-01        | 1.2E-03              | 1.00             | 1.00      | 1.00                 | 1.00     |                      |  |  |
| 1388783_at   | transcription factor 21                                                                 | Tcf21                | 252856         | 1.19           | 0.20                 | 7.0E-01        | 2.7E-02              | 1.00             | 1.00      | 0.20                 | 1.00     |                      |  |  |
| 1374454_at   | protein-L-isospartate (D-aspartate) O-methyltransferase domain containing 2 (predicted) | Pemt2_predicted      | 311726         | 1.12           | 0.20                 | 7.9E-01        | 2.3E-04              | 1.00             | 1.00      | 1.00                 | 1.00     |                      |  |  |
| 1368098_a_at | small nuclear ribonucleoprotein N                                                       | Snrpn                | 81781          | 0.72           | 0.20                 | 3.6E-01        | 3.7E-03              | 1.00             | 1.00      | 0.00                 | 1.00     |                      |  |  |
| 1370930_at   | Active BCR-related gene (predicted)                                                     | Abr_predicted        | 287537         | 0.99           | 0.20                 | 9.6E-01        | 9.9E-04              | 1.00             | 1.00      | 1.00                 | 1.00     |                      |  |  |
| 1368894_at   | CAP, adenylate cyclase-associated protein, 2 (yeast)                                    | Cap2                 | 116653         | 1.07           | 0.20                 | 8.4E-01        | 1.1E-03              | 1.00             | 1.00      | 0.60                 | 1.00     |                      |  |  |
| 1369625_at   | aquaporin 1                                                                             | Aqp1                 | 25240          | 0.95           | 0.20                 | 9.1E-01        | 1.1E-03              | 1.00             | 1.00      | 1.00                 | 1.00     |                      |  |  |
| 1376537_at   | Protein tyrosine phosphatase, non-receptor type 3                                       | Ptpn3                | 362524         | 0.38           | 0.20                 | 1.2E-02        | 5.3E-04              | 0.80             | 1.00      | 0.40                 | 1.00     |                      |  |  |
| 1373684_at   | Transcribed locus                                                                       |                      |                | 1.22           | 0.20                 | 4.2E-01        | 2.3E-03              | 1.00             | 1.00      | 0.80                 | 1.00     |                      |  |  |
| 1388697_at   | inositol polyphosphate-5-phosphatase A (predicted)                                      | Inpp5a_predicted     | 365382         | 0.91           | 0.20                 | 7.0E-01        | 7.9E-04              | 1.00             | 1.00      | 1.00                 | 1.00     |                      |  |  |
| 1398248_s_at | myosin, heavy polypeptide 6, cardiac muscle, alpha                                      | Myh6                 | 29556          | 1.13           | 0.20                 | 6.7E-01        | 1.4E-02              | 1.00             | 1.00      | 1.00                 | 1.00     |                      |  |  |
| 1386951_at   | NADH dehydrogenase (ubiquinone) 1 alpha subcomplex 5                                    | Ndufa5               | 25488          | 0.59           | 0.20                 | 2.9E-01        | 1.1E-03              | 1.00             | 1.00      | 1.00                 | 1.00     |                      |  |  |
| 1371965_at   | similar to Propionyl-CoA carboxylase alpha chain, mitochondrial precursor               | LOC687008            | 687008         | 0.84           | 0.20                 | 4.7E-01        | 8.2E-04              | 1.00             | 1.00      | 0.80                 | 1.00     |                      |  |  |
| 1371358_at   | glycoprotein, synaptic 2                                                                | Gpsn2                | 191576         | 1.10           | 0.20                 | 7.2E-01        | 1.6E-03              | 1.00             | 1.00      | 1.00                 | 1.00     |                      |  |  |
| 1389757_at   | Metadherin                                                                              | Muh                  | 170910         | 0.77           | 0.20                 | 4.4E-01        | 2.7E-02              | 1.00             | 1.00      | 0.00                 | 1.00     |                      |  |  |
| 1370550_at   | limbic system-associated membrane protein                                               | Lsamp                | 29561          | 0.74           | 0.20                 | 3.4E-01        | 6.9E-03              | 0.70             | 1.00      | 0.00                 | 0.75     |                      |  |  |
| 1370209_at   | Kruppel-like factor 9                                                                   | Klf9                 | 117560         | 0.78           | 0.20                 | 4.4E-01        | 3.9E-04              | 1.00             | 1.00      | 1.00                 | 1.00     |                      |  |  |
| 1388583_at   | chemokine (C-X-C motif) ligand 12                                                       | Cxcl12               | 24772          | 1.14           | 0.20                 | 5.9E-01        | 1.7E-03              | 1.00             | 1.00      | 1.00                 | 1.00     |                      |  |  |
| 1371577_at   | NADH dehydrogenase (ubiquinone) Fe-S protein 1                                          | Ndufs1               | 301458         | 1.04           | 0.20                 | 7.9E-01        | 2.8E-04              | 1.00             | 1.00      | 1.00                 | 1.00     |                      |  |  |
| 1371483_at   | nicotinamide nucleotide transhydrogenase (mapped)                                       | Nnt                  | 310378         | 0.78           | 0.20                 | 2.5E-01        | 1.2E-03              | 1.00             | 1.00      | 1.00                 | 1.00     |                      |  |  |
| 1387401_at   | calsequestrin 2                                                                         | Casq2                | 29209          | 0.93           | 0.20                 | 7.6E-01        | 5.8E-04              | 1.00             | 1.00      | 1.00                 | 1.00     |                      |  |  |
| 1371625_at   | brain glycogen phosphorylase                                                            | Pygb                 | 25739          | 0.94           | 0.19                 | 9.0E-01        | 4.0E-04              | 1.00             | 1.00      | 1.00                 | 1.00     |                      |  |  |

| Probe Set ID | Gene Title                                                                                | Gene Symbol          | Entrez Gene ID | Fold Change   |                  | False Discovery Rate |                      | Average Present Call |           |           |          |
|--------------|-------------------------------------------------------------------------------------------|----------------------|----------------|---------------|------------------|----------------------|----------------------|----------------------|-----------|-----------|----------|
|              |                                                                                           |                      |                | Strain Effect | Rejection Effect | Native BN / DA       | Allograft / Isograft | Native BN            | Native DA | Allograft | Isograft |
| 1388718_at   | tropomodulin 1                                                                            | Tmod1                | 25566          | 1.23          | 0.19             | 4.0E-01              | 1.00                 | 1.00                 | 1.00      | 1.00      | 1.00     |
| 1368272_at   | glutamate oxaloacetate transaminase 1                                                     | Got1                 | 24401          | 1.16          | 0.19             | 6.8E-01              | 4.8E-04              | 1.00                 | 1.00      | 1.00      | 1.00     |
| 1389772_at   | Transcribed locus                                                                         |                      |                | 0.86          | 0.19             | 3.6E-01              | 2.8E-02              | 1.00                 | 1.00      | 1.00      | 1.00     |
| 1368322_at   | superoxide dismutase 3, extracellular                                                     | Sod3                 | 25352          | 1.15          | 0.19             | 6.0E-01              | 4.8E-04              | 1.00                 | 1.00      | 0.30      | 1.00     |
| 1376222_at   | similar to HCD1 protein (predicted)                                                       | RGD1309307_predicted | 361044         | 0.83          | 0.19             | 5.8E-01              | 1.3E-03              | 1.00                 | 1.00      | 0.00      | 0.88     |
| 1388358_at   | electron-transfer-flavoprotein, beta polypeptide                                          | Etfb                 | 292845         | 0.88          | 0.19             | 7.0E-01              | 6.2E-04              | 1.00                 | 1.00      | 1.00      | 1.00     |
| 1367589_at   | aconitase 2, mitochondrial                                                                | Aco2                 | 79250          | 0.97          | 0.19             | 9.4E-01              | 4.5E-04              | 1.00                 | 1.00      | 1.00      | 1.00     |
| 1370390_at   | coronin, actin binding protein 6                                                          | Coro6                | 245982         | 1.14          | 0.19             | 5.4E-01              | 1.2E-03              | 1.00                 | 1.00      | 1.00      | 1.00     |
| 1369085_s_at | small nuclear ribonucleoprotein N                                                         | Snrp                 | 113938         | 1.03          | 0.19             | 9.6E-01              | 7.9E-04              | 1.00                 | 1.00      | 1.00      | 1.00     |
| 1367777_at   | 2,4-dienoyl CoA reductase 1, mitochondrial                                                | Decr1                | 117543         | 0.83          | 0.19             | 4.8E-01              | 1.0E-03              | 1.00                 | 1.00      | 1.00      | 1.00     |
| 1373604_at   | hypothetical protein LOC680199                                                            | LOC680199            | 680199         | 0.79          | 0.19             | 2.3E-01              | 1.0E-02              | 1.00                 | 1.00      | 0.00      | 1.00     |
| 1370237_at   | L-3-hydroxyacyl-Coenzyme A dehydrogenase, short chain                                     | Hadhs                | 113965         | 1.01          | 0.19             | 9.7E-01              | 5.6E-04              | 1.00                 | 1.00      | 1.00      | 1.00     |
| 1367763_at   | acetyl-coenzyme A acetyltransferase 1                                                     | Acat1                | 25014          | 1.01          | 0.19             | 9.8E-01              | 3.7E-04              | 1.00                 | 1.00      | 1.00      | 1.00     |
| 1376927_at   | similar to LOC432779 protein (predicted)                                                  | RGD1564978_predicted | 502225         | 1.02          | 0.19             | 9.6E-01              | 1.0E-03              | 1.00                 | 1.00      | 1.00      | 1.00     |
| 1388604_at   | similar to Calsequestrin-1 precursor (Calsequestrin, skeletal muscle isoform)             | LOC679341            | 679341         | 0.89          | 0.19             | 7.8E-01              | 3.3E-04              | 1.00                 | 1.00      | 1.00      | 1.00     |
| 1388961_at   | integrin beta 1 binding protein 2 (predicted)                                             | Igb1bp2_predicted    | 317258         | 0.90          | 0.19             | 6.6E-01              | 2.4E-03              | 1.00                 | 1.00      | 0.60      | 1.00     |
| 1371389_at   | hypothetical LOC306766                                                                    | LOC306766            | 306766         | 0.43          | 0.19             | 4.4E-02              | 7.6E-04              | 1.00                 | 1.00      | 1.00      | 1.00     |
| 1373911_at   | perostin, osteoblast specific factor (predicted)                                          | Postn_predicted      | 361945         | 0.63          | 0.19             | 7.3E-01              | 9.2E-02              | 1.00                 | 1.00      | 1.00      | 1.00     |
| 1374088_at   | myopalladin (predicted)                                                                   | Mypn_predicted       | 309760         | 1.03          | 0.19             | 9.4E-01              | 1.7E-02              | 1.00                 | 1.00      | 0.60      | 1.00     |
| 1371942_at   | similar to Citrullione S-transferase, theta 3 (predicted)                                 | RGD1562732_predicted | 499422         | 0.90          | 0.19             | 6.5E-01              | 5.3E-03              | 0.70                 | 1.00      | 0.00      | 1.00     |
| 1372641_at   | Alpha-kinase 3 (predicted)                                                                | Alpk3_predicted      | 365298         | 1.00          | 0.19             | 9.9E-01              | 5.1E-04              | 1.00                 | 1.00      | 1.00      | 1.00     |
| 1375349_at   | similar to sorbin and SH3 domain containing 1 isoform 3                                   | LOC678826            | 678826         | 1.11          | 0.19             | 7.6E-01              | 3.1E-03              | 1.00                 | 1.00      | 1.00      | 1.00     |
| 1372103_at   | similar to DnaJ (Hsp40) homolog, subfamily A, member 4                                    | LOC498996            | 498996         | 0.86          | 0.19             | 4.2E-01              | 3.8E-04              | 1.00                 | 1.00      | 1.00      | 1.00     |
| 1375476_at   | muscle glycogen phosphorylase                                                             | Pygm                 | 24701          | 1.52          | 0.19             | 2.4E-01              | 3.8E-04              | 1.00                 | 1.00      | 0.00      | 1.00     |
| 1368038_at   | synaptotagmin 2 binding protein                                                           | Synj2bp              | 64531          | 0.78          | 0.19             | 3.8E-01              | 7.4E-04              | 1.00                 | 1.00      | 1.00      | 1.00     |
| 1372240_at   | sarcoglycan, alpha (dystrophin-associated glycoprotein) (predicted)                       | Sgca_predicted       | 303468         | 0.85          | 0.19             | 5.5E-01              | 6.7E-04              | 1.00                 | 1.00      | 1.00      | 1.00     |
| 1368566_a_at | NADH dehydrogenase (ubiquinone) flavoprotein 3-like                                       | Ndufv3l              | 64539          | 0.74          | 0.19             | 3.7E-01              | 3.1E-03              | 1.00                 | 1.00      | 1.00      | 1.00     |
| 1376852_at   | methylcrotonoyl-Coenzyme A carboxylase 1 (alpha)                                          | Mcc1                 | 294972         | 1.13          | 0.19             | 7.9E-01              | 3.1E-03              | 1.00                 | 1.00      | 0.80      | 1.00     |
| 1368716_at   | protein phosphatase 1, regulatory (inhibitor) subunit 14c                                 | Ppp1r14c             | 171010         | 1.05          | 0.19             | 9.3E-01              | 3.2E-03              | 1.00                 | 1.00      | 0.00      | 1.00     |
| 1370956_at   | decorin                                                                                   | Den                  | 29139          | 1.18          | 0.19             | 5.8E-01              | 2.5E-02              | 1.00                 | 1.00      | 1.00      | 1.00     |
| 1371421_at   | similar to 3-oxoacid CoA transferase 1                                                    | LOC678860            | 678860         | 1.12          | 0.18             | 6.0E-01              | 3.0E-03              | 1.00                 | 1.00      | 1.00      | 1.00     |
| 1372256_at   | Transcribed locus                                                                         |                      |                | 0.09          | 0.18             | 2.3E-02              | 7.9E-04              | 0.00                 | 0.38      | 0.00      | 1.00     |
| 1389411_at   | Transcribed locus                                                                         |                      |                | 1.53          | 0.18             | 8.4E-02              | 4.5E-03              | 1.00                 | 1.00      | 0.60      | 1.00     |
| 1374017_at   | Similar to tripartite motif protein 50 (predicted)                                        | RGD1562778_predicted | 365377         | 1.76          | 0.18             | 4.9E-02              | 8.8E-04              | 1.00                 | 1.00      | 1.00      | 1.00     |
| 1367829_at   | enoyl Coenzyme A hydratase, short chain, 1, mitochondrial                                 | Ech1s                | 140547         | 1.14          | 0.18             | 6.4E-01              | 1.2E-03              | 1.00                 | 1.00      | 0.60      | 1.00     |
| 1376495_at   | Transcribed locus                                                                         |                      |                | 1.19          | 0.18             | 7.5E-01              | 2.4E-03              | 1.00                 | 1.00      | 0.00      | 1.00     |
| 1371794_at   | similar to SH3-domain binding protein 3                                                   | LOC688018            | 688018         | 1.01          | 0.18             | 9.8E-01              | 4.8E-04              | 1.00                 | 1.00      | 1.00      | 1.00     |
| 1370854_at   | nexilin                                                                                   | Nexn                 | 246172         | 1.09          | 0.18             | 6.6E-01              | 4.1E-03              | 1.00                 | 1.00      | 1.00      | 1.00     |
| 1371519_at   | electron-transferring-flavoprotein dehydrogenase                                          | Etfhd                | 295143         | 1.10          | 0.18             | 7.6E-01              | 3.4E-04              | 1.00                 | 1.00      | 1.00      | 1.00     |
| 1369948_at   | nerve growth factor receptor (TNFRSF16) associated protein 1                              | Ngfrap1              | 117089         | 1.06          | 0.18             | 9.1E-01              | 4.1E-03              | 1.00                 | 1.00      | 0.40      | 1.00     |
| 1387893_at   | complement component 1, s subcomponent                                                    | C1s                  | 192262         | 1.70          | 0.18             | 2.3E-01              | 7.0E-03              | 1.00                 | 1.00      | 1.00      | 1.00     |
| 1370697_a_at | nexilin                                                                                   | Nexn                 | 246172         | 1.28          | 0.18             | 1.9E-01              | 7.6E-03              | 1.00                 | 1.00      | 1.00      | 1.00     |
| 1372157_at   | bolA-like 1 (E. coli) (predicted)                                                         | BolA1_predicted      | 365875         | 0.61          | 0.18             | 1.5E-01              | 1.4E-03              | 1.00                 | 1.00      | 0.50      | 1.00     |
| 1389460_at   | Transcribed locus                                                                         |                      |                | 1.61          | 0.18             | 2.2E-01              | 5.5E-04              | 1.00                 | 1.00      | 0.40      | 1.00     |
| 1373188_at   | sodium channel, voltage-gated, type IV, beta                                              | Scn4b                | 315611         | 0.79          | 0.18             | 1.2E-01              | 1.2E-03              | 1.00                 | 1.00      | 1.00      | 1.00     |
| 1372158_at   | LRP16 protein                                                                             | Lrp16                | 246233         | 0.81          | 0.18             | 5.8E-01              | 1.3E-03              | 1.00                 | 1.00      | 0.30      | 1.00     |
| 1373674_at   | microfibrillar associated protein 5 (predicted)                                           | Mfap5_predicted      | 362429         | 0.58          | 0.18             | 2.9E-01              | 1.8E-02              | 0.20                 | 1.00      | 0.80      | 1.00     |
| 1375518_at   | titin                                                                                     | Tin                  | 84015          | 1.17          | 0.18             | 5.2E-01              | 1.7E-03              | 1.00                 | 1.00      | 1.00      | 1.00     |
| 1388211_s_at | cytosolic acyl-CoA thioesterase 1                                                         | Cte1                 | 192272         | 1.06          | 0.18             | 8.9E-01              | 6.3E-02              | 0.90                 | 0.50      | 0.00      | 1.00     |
| 1374496_at   | similar to RIKEN cDNA 1200009022; EST AI316813                                            | RGD1310827           | 362364         | 0.81          | 0.18             | 5.6E-01              | 5.5E-04              | 1.00                 | 1.00      | 0.30      | 1.00     |
| 1389774_at   | Transcribed locus                                                                         |                      |                | 0.78          | 0.18             | 1.8E-01              | 1.8E-02              | 0.60                 | 1.00      | 0.30      | 1.00     |
| 1388570_at   | similar to RIKEN cDNA 2310005014                                                          | LOC498909            | 498909         | 0.91          | 0.18             | 7.4E-01              | 6.7E-04              | 1.00                 | 1.00      | 1.00      | 1.00     |
| 1390033_at   | Transcribed locus                                                                         |                      |                | 1.18          | 0.18             | 7.5E-01              | 1.1E-02              | 0.80                 | 0.25      | 0.00      | 0.75     |
| 1372848_at   | Transcribed locus                                                                         |                      |                | 0.94          | 0.18             | 8.6E-01              | 1.0E-03              | 1.00                 | 1.00      | 0.00      | 1.00     |
| 1370036_at   | sulfite oxidase                                                                           | Suox                 | 81805          | 1.03          | 0.18             | 9.5E-01              | 6.0E-03              | 1.00                 | 1.00      | 0.00      | 1.00     |
| 1367799_at   | eukaryotic translation elongation factor 1 alpha 2                                        | Eef1a2               | 24799          | 1.11          | 0.18             | 7.3E-01              | 1.5E-04              | 1.00                 | 1.00      | 1.00      | 1.00     |
| 1376128_at   | Transcribed locus                                                                         |                      |                | 1.49          | 0.18             | 2.9E-01              | 4.7E-03              | 1.00                 | 1.00      | 0.00      | 1.00     |
| 1373953_at   | solute carrier family 4 (anion exchanger), member 1, adaptor protein (predicted)          | Slc4a1ap_predicted   | 298805         | 1.01          | 0.18             | 9.8E-01              | 1.6E-03              | 1.00                 | 1.00      | 1.00      | 1.00     |
| 1388916_at   | Similar to novel protein (predicted)                                                      | RGD1564074_predicted | 500514         | 1.04          | 0.17             | 9.2E-01              | 1.3E-03              | 1.00                 | 1.00      | 1.00      | 1.00     |
| 1385704_at   | tensin                                                                                    | Tns                  | 29136          | 1.69          | 0.17             | 3.3E-01              | 2.4E-03              | 1.00                 | 0.63      | 0.00      | 1.00     |
| 1372475_at   | PTEN induced putative kinase 1 (predicted)                                                | Pink1_predicted      | 298575         | 0.92          | 0.17             | 8.1E-01              | 1.2E-03              | 1.00                 | 1.00      | 1.00      | 1.00     |
| 1368988_at   | calsequestrin 2                                                                           | Casq2                | 29209          | 0.84          | 0.17             | 5.7E-01              | 8.6E-04              | 1.00                 | 1.00      | 1.00      | 1.00     |
| 1374307_at   | Transcribed locus                                                                         |                      |                | 0.93          | 0.17             | 8.6E-01              | 6.4E-03              | 1.00                 | 1.00      | 0.40      | 1.00     |
| 1389449_at   | similar to CG10671-like (predicted)                                                       | RGD1306911_predicted | 290223         | 0.79          | 0.17             | 5.2E-01              | 1.4E-04              | 1.00                 | 1.00      | 0.80      | 1.00     |
| 1374796_at   | similar to Beta-sarcoglycan (Beta-SG) (43 kDa dystrophin-associated glycoprotein) (43DAG) | LOC687025            | 687025         | 0.81          | 0.17             | 4.5E-01              | 9.9E-04              | 1.00                 | 1.00      | 1.00      | 1.00     |
| 1390227_at   | hypothetical protein LOC678810                                                            | LOC678810            | 678810         | 0.49          | 0.17             | 7.6E-02              | 5.0E-02              | 0.80                 | 1.00      | 0.00      | 1.00     |
| 1369698_at   | ATP-binding cassette, sub-family C (CFTR/MRP), member 3                                   | Abcc3                | 140668         | 0.92          | 0.17             | 7.9E-01              | 4.1E-03              | 0.50                 | 0.75      | 0.00      | 0.50     |
| 1372400_at   | similar to cullin 4A (predicted)                                                          | RGD1563853_predicted | 361181         | 0.98          | 0.17             | 9.8E-01              | 4.0E-04              | 1.00                 | 1.00      | 1.00      | 1.00     |
| 1392633_at   | Transcribed locus                                                                         |                      |                | 0.85          | 0.17             | 7.5E-01              | 4.8E-04              | 1.00                 | 1.00      | 0.00      | 1.00     |
| 1367749_at   | lumican                                                                                   | Lum                  | 81682          | 0.84          | 0.17             | 6.2E-01              | 5.1E-02              | 1.00                 | 1.00      | 1.00      | 1.00     |
| 1376175_at   | similar to NipSnap2 protein (Glioblastoma amplified sequence)                             | LOC498174            | 498174         | 0.74          | 0.17             | 6.5E-01              | 1.9E-04              | 1.00                 | 1.00      | 1.00      | 1.00     |
| 1367885_at   | peroxisomal membrane protein 2                                                            | Pmp2                 | 29533          | 1.00          | 0.17             | 1.0E+00              | 2.5E-03              | 1.00                 | 1.00      | 1.00      | 1.00     |
| 1373011_at   | hypothetical protein LOC619558                                                            | LOC619558            | 619558         | 1.01          | 0.17             | 9.8E-01              | 1.0E-03              | 1.00                 | 1.00      | 1.00      | 1.00     |
| 1379747_at   | Protease, serine, 35                                                                      | Prss35               | 315866         | 0.77          | 0.17             | 9.0E-01              | 2.6E-03              | 0.00                 | 0.00      | 0.20      | 1.00     |
| 1370232_at   | isovaleryl coenzyme A dehydrogenase                                                       | Ivd                  | 24513          | 1.16          | 0.17             | 5.1E-01              | 1.9E-03              | 1.00                 | 1.00      | 1.00      | 1.00     |
| 1373920_at   | Similar to CG10084-PA                                                                     | RGD1308297           | 306137         | 0.71          | 0.17             | 2.8E-01              | 2.9E-03              | 1.00                 | 1.00      | 1.00      | 1.00     |
| 1368924_at   | growth hormone receptor                                                                   | Ghr                  | 25235          | 1.77          | 0.17             | 3.0E-01              | 1.5E-03              | 1.00                 | 1.00      | 0.60      | 1.00     |

| Probe Set ID | Gene Title                                                                        | Gene Symbol          | Entrez Gene ID | Fold Change   |                  | False Discovery Rate |                     | Average Present Call |           |           |         |
|--------------|-----------------------------------------------------------------------------------|----------------------|----------------|---------------|------------------|----------------------|---------------------|----------------------|-----------|-----------|---------|
|              |                                                                                   |                      |                | Strain Effect | Rejection Effect | Native BN / DA       | Allograft / Isoraft | Native BN            | Native DA | Allograft | Isoraft |
| 1370648_a_at | SH3 domain binding protein CR16                                                   | Cr16                 | 259242         | 0.80          | 0.17             | 5.3E-01              | 6.5E-03             | 1.00                 | 1.00      | 0.60      | 1.00    |
| 1376619_at   | similar to protein tyrosine phosphatase, receptor type, D (predicted)             | RGD1561090_predicted | 313278         | 1.70          | 0.17             | 7.3E-01              | 4.6E-04             | 0.60                 | 0.25      | 0.00      | 1.00    |
| 1387373_at   | phosphodiesterase 4D interacting protein (myomegalin)                             | Pde4dip              | 64183          | 1.44          | 0.17             | 3.5E-01              | 3.0E-04             | 1.00                 | 1.00      | 1.00      | 1.00    |
| 1372595_at   | actinin alpha 2 (predicted)                                                       | Actn2_predicted      | 291245         | 0.96          | 0.17             | 9.1E-01              | 4.5E-03             | 1.00                 | 1.00      | 1.00      | 1.00    |
| 1370259_a_at | parathyroid hormone receptor 1                                                    | Pthr1                | 56813          | 1.07          | 0.17             | 9.0E-01              | 4.9E-02             | 0.00                 | 0.25      | 0.00      | 1.00    |
| 1372423_at   | PERP, TP53 apoptosis effector (predicted)                                         | Perp_predicted       | 292949         | 1.21          | 0.17             | 7.6E-01              | 9.9E-04             | 1.00                 | 1.00      | 0.30      | 1.00    |
| 1374648_at   | Transcribed locus                                                                 |                      |                | 0.41          | 0.17             | 8.4E-02              | 6.9E-04             | 0.80                 | 1.00      | 0.00      | 1.00    |
| 1389694_at   | Transcribed locus                                                                 |                      |                | 0.82          | 0.17             | 8.0E-01              | 1.8E-02             | 1.00                 | 1.00      | 0.00      | 1.00    |
| 1372457_at   | mitochondrial tumor suppressor 1                                                  | Mtst1                | 306487         | 0.93          | 0.16             | 7.2E-01              | 2.0E-04             | 1.00                 | 1.00      | 1.00      | 1.00    |
| 1375849_at   | RGM domain family, member A (predicted)                                           | Rgma_predicted       | 308739         | 0.76          | 0.16             | 6.6E-01              | 3.3E-03             | 1.00                 | 1.00      | 0.20      | 1.00    |
| 1367702_at   | acetyl-Coenzyme A dehydrogenase, medium chain                                     | Acadm                | 24158          | 0.99          | 0.16             | 9.9E-01              | 9.5E-04             | 1.00                 | 1.00      | 1.00      | 1.00    |
| 1370952_at   | glutathione S-transferase, mu 2                                                   | Gstm2                | 24424          | 1.44          | 0.16             | 4.5E-01              | 4.3E-04             | 1.00                 | 1.00      | 1.00      | 1.00    |
| 1372452_at   | Transcribed locus                                                                 |                      |                | 0.54          | 0.16             | 1.7E-01              | 4.8E-04             | 1.00                 | 1.00      | 0.80      | 1.00    |
| 1388456_at   | S100 calcium binding protein A1                                                   | S100a1               | 295214         | 1.10          | 0.16             | 8.4E-01              | 1.2E-02             | 1.00                 | 1.00      | 0.00      | 1.00    |
| 1375182_at   | Solute carrier family 3, member 1                                                 | Slc3a1               | 29484          | 1.29          | 0.16             | 5.1E-01              | 3.4E-04             | 1.00                 | 1.00      | 1.00      | 1.00    |
| 1373082_at   | Transcribed locus                                                                 |                      |                | 0.72          | 0.16             | 1.1E-01              | 1.6E-03             | 1.00                 | 1.00      | 1.00      | 1.00    |
| 1377133_at   | Hypothetical protein LOC680687                                                    | LOC680687            | 680687         | 0.14          | 0.16             | 1.3E-01              | 4.0E-03             | 0.00                 | 1.00      | 0.00      | 1.00    |
| 1378625_at   | insulin-like growth factor binding protein 6                                      | Igfbp6               | 25641          | 0.38          | 0.16             | 6.9E-02              | 1.9E-03             | 0.00                 | 1.00      | 0.20      | 1.00    |
| 1374925_at   | Transcribed locus                                                                 |                      |                | 1.18          | 0.16             | 5.7E-01              | 4.8E-04             | 1.00                 | 1.00      | 1.00      | 1.00    |
| 1370109_at   | sulfotransferase family 1A, phenol-preferring, member 1                           | Sult1a1              | 83783          | 0.59          | 0.16             | 3.6E-01              | 6.0E-04             | 1.00                 | 1.00      | 0.60      | 1.00    |
| 1374335_at   | GATA binding protein 6                                                            | Gata6                | 29300          | 0.88          | 0.16             | 8.1E-01              | 4.4E-05             | 1.00                 | 1.00      | 1.00      | 1.00    |
| 1370061_at   | RAB3B, member RAS oncogene family                                                 | Rab3b                | 81755          | 0.94          | 0.16             | 8.6E-01              | 2.4E-03             | 1.00                 | 1.00      | 0.00      | 1.00    |
| 1373915_at   | dystrophia myotonica-protein kinase (predicted)                                   | Dmpk_predicted       | 308405         | 0.85          | 0.16             | 6.2E-01              | 6.2E-04             | 1.00                 | 1.00      | 1.00      | 1.00    |
| 1386965_at   | lipoprotein lipase                                                                | Lpl                  | 24539          | 1.15          | 0.16             | 4.0E-01              | 1.0E-03             | 1.00                 | 1.00      | 1.00      | 1.00    |
| 1367659_s_at | dodecenoyl-coenzyme A delta isomerase                                             | Dei                  | 29740          | 0.70          | 0.16             | 2.1E-01              | 6.1E-04             | 1.00                 | 1.00      | 1.00      | 1.00    |
| 1383169_at   | Transcribed locus                                                                 |                      |                | 1.33          | 0.16             | 4.6E-01              | 1.3E-03             | 1.00                 | 1.00      | 1.00      | 1.00    |
| 1367739_at   | Cytochrom c oxidase subunit VIII-H (heart/muscle)                                 | Cox8b                | 25250          | 0.80          | 0.16             | 5.4E-01              | 1.1E-02             | 1.00                 | 1.00      | 1.00      | 1.00    |
| 1369957_at   | regulator of G-protein signaling 5                                                | Rgs5                 | 54294          | 1.23          | 0.15             | 6.3E-01              | 1.9E-03             | 1.00                 | 1.00      | 0.60      | 1.00    |
| 1372820_at   | Transcribed locus                                                                 |                      |                | 1.03          | 0.15             | 9.4E-01              | 5.2E-02             | 1.00                 | 1.00      | 4.00      | 1.00    |
| 1375638_at   | serum deprivation response protein                                                | Sdpr                 | 316384         | 1.07          | 0.15             | 9.0E-01              | 3.2E-04             | 1.00                 | 1.00      | 1.00      | 1.00    |
| 1384178_at   | leucine rich repeat containing 4B (predicted)                                     | Lrrc4b_predicted     | 308571         | 0.72          | 0.15             | 3.8E-01              | 2.0E-04             | 1.00                 | 1.00      | 1.00      | 1.00    |
| 1388300_at   | microsomal glutathione S-transferase 3 (predicted)                                | Mgst3_predicted      | 289197         | 0.98          | 0.15             | 9.8E-01              | 7.3E-04             | 1.00                 | 1.00      | 1.00      | 1.00    |
| 1373427_at   | Ras-related GTP binding D (predicted)                                             | Rragd_predicted      | 297960         | 0.60          | 0.15             | 1.3E-01              | 8.1E-03             | 1.00                 | 1.00      | 0.00      | 1.00    |
| 1374172_at   | Transcribed locus                                                                 |                      |                | 1.54          | 0.15             | 2.9E-01              | 5.5E-04             | 0.60                 | 0.00      | 0.20      | 1.00    |
| 1390766_at   | similar to Tubulin alpha-8 chain (Alpha-tubulin 8)                                | LOC500377            | 500377         | 0.88          | 0.15             | 4.8E-01              | 2.7E-03             | 1.00                 | 1.00      | 0.70      | 1.00    |
| 1372646_at   | similar to RIKEN cDNA 1500015O10 (predicted)                                      | RGD1305645_predicted | 363225         | 0.33          | 0.15             | 2.9E-01              | 3.7E-03             | 0.00                 | 0.00      | 0.00      | 0.75    |
| 1374989_at   | ankyrin repeat and SOCS box-containing protein 12                                 | Asb12                | 503446         | 0.78          | 0.15             | 4.0E-01              | 1.4E-02             | 1.00                 | 1.00      | 0.00      | 1.00    |
| 1376575_at   | Transcribed locus                                                                 |                      |                | 0.74          | 0.15             | 4.9E-01              | 4.5E-04             | 1.00                 | 1.00      | 0.80      | 1.00    |
| 1376105_at   | procollagen, type XIV, alpha 1 (predicted)                                        | Col14a1_predicted    | 314981         | 1.09          | 0.15             | 8.6E-01              | 7.6E-03             | 1.00                 | 1.00      | 0.50      | 1.00    |
| 1367892_at   | pyruvate dehydrogenase kinase, isoenzyme 2                                        | Pdk2                 | 81530          | 0.92          | 0.15             | 8.1E-01              | 2.7E-04             | 1.00                 | 1.00      | 0.60      | 1.00    |
| 1374029_at   | Transcribed locus                                                                 |                      |                | 0.78          | 0.15             | 3.1E-01              | 2.5E-02             | 1.00                 | 1.00      | 0.00      | 1.00    |
| 1388497_at   | thioesterase superfamily member 2 (predicted)                                     | Them2_predicted      | 291135         | 0.65          | 0.15             | 1.6E-01              | 7.7E-04             | 1.00                 | 1.00      | 1.00      | 1.00    |
| 1392939_at   | solute carrier family 41, member 3                                                | Slc41a3              | 641603         | 1.34          | 0.15             | 3.8E-01              | 4.1E-04             | 1.00                 | 1.00      | 1.00      | 1.00    |
| 1389583_at   | similar to Hypothetical protein MGCS37938 (predicted)                             | RGD1566169_predicted | 298605         | 0.73          | 0.15             | 2.7E-01              | 2.2E-03             | 1.00                 | 1.00      | 0.20      | 1.00    |
| 1383058_at   | Transcribed locus                                                                 |                      |                | 0.95          | 0.15             | 8.7E-01              | 2.8E-04             | 1.00                 | 1.00      | 1.00      | 1.00    |
| 1387004_at   | neuroblastoma, suppression of tumorigenicity 1                                    | Nbl1                 | 50594          | 0.79          | 0.15             | 5.4E-01              | 6.0E-03             | 0.10                 | 0.00      | 0.00      | 1.00    |
| 1370973_at   | sodium channel, voltage-gated, type VII, alpha                                    | Scn7a                | 64155          | 1.07          | 0.15             | 9.0E-01              | 2.5E-02             | 1.00                 | 1.00      | 0.50      | 1.00    |
| 1388506_at   | desmoplakin                                                                       | Dsp                  | 306871         | 1.46          | 0.15             | 1.2E-01              | 5.5E-04             | 1.00                 | 1.00      | 1.00      | 1.00    |
| 1370906_at   | branched chain keto acid dehydrogenase E1, beta polypeptide                       | Bckdhb               | 29711          | 1.04          | 0.15             | 9.4E-01              | 1.0E-03             | 1.00                 | 1.00      | 0.00      | 1.00    |
| 1372390_at   | Transcribed locus                                                                 |                      |                | 0.96          | 0.14             | 9.7E-01              | 3.7E-04             | 1.00                 | 1.00      | 0.00      | 1.00    |
| 1377275_at   | ADP-ribosyltransferase 1 (predicted)                                              | Art1_predicted       | 308873         | 2.64          | 0.14             | 6.4E-02              | 2.5E-02             | 1.00                 | 0.50      | 0.00      | 0.50    |
| 1389171_at   | transmembrane protein 38a (predicted)                                             | Tmem38a_predicted    | 306327         | 0.94          | 0.14             | 7.7E-01              | 1.2E-03             | 1.00                 | 1.00      | 1.00      | 1.00    |
| 1371677_at   | similar to Esophagus cancer-related gene-2 protein precursor (ECRG-2) (predicted) | RGD1307150_predicted | 301016         | 0.58          | 0.14             | 1.3E-01              | 1.7E-03             | 1.00                 | 1.00      | 1.00      | 1.00    |
| 1371356_at   | tensin like C1 domain containing phosphatase (predicted)                          | Tenc1_predicted      | 315326         | 0.94          | 0.14             | 9.4E-01              | 1.6E-02             | 1.00                 | 0.50      | 0.00      | 1.00    |
| 1373803_a_at | growth hormone receptor                                                           | Ghr                  | 25235          | 1.18          | 0.14             | 6.4E-01              | 3.2E-04             | 1.00                 | 1.00      | 0.40      | 1.00    |
| 1386927_at   | carnitine palmitoyltransferase 2                                                  | Cpt2                 | 25413          | 0.98          | 0.14             | 9.7E-01              | 7.3E-04             | 1.00                 | 1.00      | 0.00      | 1.00    |
| 1386931_at   | troponin I type 3 (cardiac)                                                       | Tnni3                | 29248          | 0.84          | 0.14             | 7.0E-01              | 6.7E-03             | 1.00                 | 1.00      | 1.00      | 1.00    |
| 1372297_at   | glutathione S-transferase, alpha 4                                                | Gsta4                | 300850         | 0.53          | 0.14             | 1.1E-01              | 7.9E-04             | 1.00                 | 1.00      | 1.00      | 1.00    |
| 1386962_at   | phospholipase C, beta 4                                                           | Plc4                 | 25031          | 1.02          | 0.14             | 9.6E-01              | 2.9E-04             | 1.00                 | 1.00      | 1.00      | 1.00    |
| 1370229_at   | N-myc downstream regulated gene 4                                                 | Ndr4                 | 64457          | 1.23          | 0.14             | 3.4E-01              | 3.7E-04             | 1.00                 | 1.00      | 1.00      | 1.00    |
| 1374038_at   | Transcribed locus                                                                 |                      |                | 1.11          | 0.14             | 8.5E-01              | 2.1E-04             | 1.00                 | 1.00      | 1.00      | 1.00    |
| 1374444_at   | plexin B1 (predicted)                                                             | Plexb1_predicted     | 316009         | 2.10          | 0.14             | 4.9E-02              | 7.8E-03             | 1.00                 | 1.00      | 0.00      | 1.00    |
| 1371951_at   | Transcribed locus                                                                 |                      |                | 1.00          | 0.14             | 9.9E-01              | 1.3E-03             | 1.00                 | 1.00      | 1.00      | 1.00    |
| 1387344_at   | aldehyde dehydrogenase family 6, subfamily A1                                     | Aldh6a1              | 81708          | 1.23          | 0.14             | 6.2E-01              | 4.6E-04             | 1.00                 | 1.00      | 1.00      | 1.00    |
| 1388432_at   | optineurin                                                                        | Optn                 | 246294         | 1.29          | 0.14             | 4.3E-01              | 7.0E-04             | 1.00                 | 1.00      | 0.70      | 1.00    |
| 1371672_at   | chromobox homolog 7                                                               | Chx7                 | 362962         | 0.91          | 0.14             | 9.2E-01              | 3.0E-03             | 0.80                 | 0.38      | 0.00      | 0.50    |
| 1370157_at   | Similar to RIKEN cDNA 2600005C20 (predicted)                                      | RGD1305633_predicted | 309673         | 0.89          | 0.14             | 5.5E-01              | 3.2E-04             | 1.00                 | 1.00      | 1.00      | 1.00    |
| 1367673_at   | selenium binding protein 2                                                        | Selenbp1             | 140927         | 1.04          | 0.14             | 9.5E-01              | 1.5E-04             | 1.00                 | 1.00      | 0.00      | 1.00    |
| 1388422_at   | LIM and senescent cell antigen like domains 2                                     | Lims2                | 361303         | 1.28          | 0.14             | 5.8E-01              | 4.5E-03             | 1.00                 | 1.00      | 0.80      | 1.00    |
| 1374056_at   | similar to RNA binding motif protein 24                                           | LOC681858            | 681858         | 1.03          | 0.13             | 9.5E-01              | 1.4E-03             | 1.00                 | 1.00      | 1.00      | 1.00    |
| 1374166_at   | Transcribed locus                                                                 |                      |                | 0.90          | 0.13             | 7.6E-01              | 4.9E-03             | 1.00                 | 1.00      | 0.60      | 1.00    |
| 1369968_at   | pleiotrophin                                                                      | Ptn                  | 24924          | 1.59          | 0.13             | 3.1E-01              | 3.3E-02             | 1.00                 | 0.88      | 0.60      | 1.00    |
| 1372613_at   | 3-hydroxybutyrate dehydrogenase, type 2 (predicted)                               | Bdh2_predicted       | 295458         | 0.61          | 0.13             | 2.8E-01              | 1.8E-02             | 1.00                 | 1.00      | 0.00      | 1.00    |
| 1372536_at   | chaperone, ABC1 activity of bc1 complex like (S. pombe)                           | Cabc1                | 360887         | 0.69          | 0.13             | 2.1E-01              | 1.2E-03             | 1.00                 | 1.00      | 1.00      | 1.00    |
| 1387703_a_at | ubiquitin specific peptidase 2                                                    | Usp2                 | 115771         | 0.85          | 0.13             | 6.2E-01              | 9.6E-04             | 1.00                 | 1.00      | 0.80      | 1.00    |
| 1377271_at   | unc-45 homolog B (C. elegans) (predicted)                                         | Unc45b_predicted     | 303373         | 1.19          | 0.13             | 5.8E-01              | 1.4E-04             | 1.00                 | 1.00      | 0.20      | 1.00    |
| 1367864_at   | phosphofructokinase, muscle                                                       | Pfkfb                | 65152          | 0.90          | 0.13             | 6.2E-01              | 1.2E-04             | 1.00                 | 1.00      | 1.00      | 1.00    |



| Probe Set ID | Gene Title                                                                                     | Gene Symbol          | Entrez Gene ID | Fold Change   |                  | False Discovery Rate |                      | Average Present Call |           |           |          |
|--------------|------------------------------------------------------------------------------------------------|----------------------|----------------|---------------|------------------|----------------------|----------------------|----------------------|-----------|-----------|----------|
|              |                                                                                                |                      |                | Strain Effect | Rejection Effect | Native BN / DA       | Allograft / Isograft | Native BN            | Native DA | Allograft | Isograft |
| 1372527_at   | reticulon 2 (Z-band associated protein)                                                        | Rtn2                 | 308410         | 0.72          | 0.13             | 2.4E-01              | 6.8E-04              | 1.00                 | 1.00      | 0.00      | 1.00     |
| 1370897_at   | branched chain ketoacid dehydrogenase E1, alpha polypeptide                                    | Bckdha               | 25244          | 0.95          | 0.13             | 8.9E-01              | 5.2E-04              | 1.00                 | 1.00      | 0.40      | 1.00     |
| 1376789_at   | Similar to Myosin light chain kinase 2, skeletal/cardiac muscle (MLCK2) (predicted)            | RGD1305801_predicted | 291926         | 0.76          | 0.13             | 2.5E-01              | 1.0E-03              | 1.00                 | 1.00      | 1.00      | 1.00     |
| 1388527_at   | Transcribed locus                                                                              |                      |                | 0.84          | 0.13             | 8.8E-01              | 1.0E-03              | 0.60                 | 0.63      | 0.40      | 1.00     |
| 1371500_at   | latent transforming growth factor beta binding protein 4                                       | Ltbp4                | 292734         | 1.06          | 0.13             | 8.8E-01              | 4.1E-03              | 1.00                 | 1.00      | 0.80      | 1.00     |
| 1373947_at   | dermatopontin (predicted)                                                                      | Dpt_predicted        | 289178         | 2.04          | 0.13             | 7.2E-02              | 9.5E-04              | 1.00                 | 1.00      | 1.00      | 1.00     |
| 1390404_at   | laminin, alpha 2 (predicted)                                                                   | Lama2_predicted      | 309368         | 0.83          | 0.13             | 5.0E-01              | 2.9E-04              | 1.00                 | 1.00      | 0.20      | 1.00     |
| 1380883_at   | Transcribed locus, strongly similar to XP_001061572.1 hypothetical protein [Rattus norvegicus] |                      |                | 1.40          | 0.13             | 4.5E-01              | 3.8E-03              | 1.00                 | 0.50      | 0.00      | 1.00     |
| 1388597_at   | myosin binding protein C, cardiac (predicted)                                                  | Mybpc3_predicted     | 295929         | 1.31          | 0.13             | 2.7E-01              | 9.1E-04              | 1.00                 | 1.00      | 1.00      | 1.00     |
| 1376892_at   | CDNA clone IMAGE:7313785                                                                       |                      |                | 0.88          | 0.13             | 7.7E-01              | 1.7E-03              | 1.00                 | 1.00      | 0.60      | 1.00     |
| 1376590_at   | Transcribed locus                                                                              |                      |                | 0.81          | 0.13             | 5.5E-01              | 7.4E-04              | 1.00                 | 1.00      | 0.00      | 1.00     |
| 1387047_at   | heat shock 27kDa protein 3                                                                     | Hspb3                | 78951          | 0.80          | 0.13             | 4.9E-01              | 5.8E-04              | 1.00                 | 1.00      | 0.30      | 1.00     |
| 1383188_at   | Transcribed locus                                                                              |                      |                | 1.13          | 0.12             | 7.1E-01              | 8.7E-03              | 1.00                 | 1.00      | 0.00      | 1.00     |
| 1384202_at   | similar to Tescalcin (predicted)                                                               | RGD1566317_predicted | 288689         | 0.82          | 0.12             | 6.3E-01              | 3.5E-03              | 1.00                 | 1.00      | 1.00      | 1.00     |
| 1385924_at   | Transcribed locus                                                                              |                      |                | 0.37          | 0.12             | 4.7E-01              | 2.8E-02              | 0.00                 | 0.88      | 0.00      | 0.63     |
| 1376905_at   | Transcribed locus                                                                              |                      |                | 0.70          | 0.12             | 8.3E-01              | 6.5E-03              | 0.00                 | 0.00      | 0.00      | 0.75     |
| 1386885_at   | enoyl coenzyme A hydratase 1, peroxisomal                                                      | Ech1                 | 64526          | 0.72          | 0.12             | 3.6E-01              | 1.8E-04              | 1.00                 | 1.00      | 1.00      | 1.00     |
| 138918_at    | Transcribed locus                                                                              |                      |                | 1.14          | 0.12             | 7.8E-01              | 1.4E-04              | 1.00                 | 1.00      | 0.60      | 1.00     |
| 1371566_at   | similar to F-box protein FBL2 (predicted)                                                      | RGD1311830_predicted | 363083         | 1.11          | 0.12             | 8.2E-01              | 1.5E-02              | 1.00                 | 1.00      | 0.60      | 1.00     |
| 1387804_at   | tripartite motif protein 63                                                                    | Trimf3               | 140930         | 1.04          | 0.12             | 8.9E-01              | 4.8E-04              | 1.00                 | 1.00      | 0.60      | 1.00     |
| 1370161_at   | steroid sensitive gene 1                                                                       | Ssg1                 | 64387          | 1.38          | 0.12             | 5.0E-01              | 3.5E-03              | 1.00                 | 1.00      | 1.00      | 1.00     |
| 1388689_at   | similar to Acylphosphatase, muscle type isozyme (Acylphosphate phosphohydrolase)               | LOC682245            | 682245         | 1.13          | 0.12             | 8.5E-01              | 4.7E-04              | 1.00                 | 1.00      | 1.00      | 1.00     |
| 1390112_at   | epidermal growth factor-containing fibulin-like extracellular matrix protein 1                 | Efemp1               | 305604         | 1.62          | 0.12             | 2.8E-01              | 2.5E-02              | 1.00                 | 0.75      | 0.20      | 1.00     |
| 1388866_at   | Transcribed locus                                                                              |                      |                | 0.71          | 0.12             | 2.1E-01              | 2.8E-04              | 1.00                 | 1.00      | 1.00      | 1.00     |
| 1388349_at   | Transcribed locus                                                                              |                      |                | 0.97          | 0.12             | 9.3E-01              | 3.6E-03              | 1.00                 | 1.00      | 1.00      | 1.00     |
| 1387121_a_at | N-myc downstream regulated gene 2                                                              | Ndrg2                | 171114         | 1.09          | 0.12             | 6.8E-01              | 1.6E-03              | 1.00                 | 1.00      | 1.00      | 1.00     |
| 1374667_at   | CDNA clone IMAGE:7302289                                                                       |                      |                | 0.99          | 0.12             | 9.9E-01              | 6.3E-04              | 1.00                 | 1.00      | 0.60      | 1.00     |
| 1370941_at   | platelet derived growth factor receptor, alpha polypeptide                                     | Pdgfra               | 25267          | 1.12          | 0.12             | 8.3E-01              | 6.2E-02              | 1.00                 | 1.00      | 0.40      | 1.00     |
| 1373130_at   | Transcribed locus                                                                              |                      |                | 1.23          | 0.12             | 4.9E-01              | 2.2E-03              | 1.00                 | 1.00      | 1.00      | 1.00     |
| 1371933_at   | Glycine-, glutamate-, thienylcyclohexylpiperidine-binding protein                              | LOC246295            | 246295         | 1.09          | 0.12             | 7.5E-01              | 4.2E-04              | 1.00                 | 1.00      | 1.00      | 1.00     |
| 1389727_at   | leucine-rich repeat-containing 10 (predicted)                                                  | Lrrc10_predicted     | 314848         | 1.28          | 0.11             | 2.0E-01              | 7.2E-04              | 1.00                 | 1.00      | 1.00      | 1.00     |
| 1383072_at   | muscle glycogen phosphorylase                                                                  | Pygm                 | 24701          | 1.61          | 0.11             | 2.5E-01              | 2.0E-04              | 1.00                 | 1.00      | 1.00      | 1.00     |
| 1398445_at   | Transcribed locus                                                                              |                      |                | 3.64          | 0.11             | 1.6E-01              | 1.9E-02              | 1.00                 | 0.25      | 0.00      | 0.88     |
| 1387022_at   | aldehyde dehydrogenase family 1, member A1                                                     | Aldh1a1              | 24188          | 0.70          | 0.11             | 2.5E-01              | 5.6E-04              | 1.00                 | 1.00      | 0.20      | 1.00     |
| 1374311_at   | similar to tripartite motif-containing 56                                                      | LOC691246            | 691246         | 0.96          | 0.11             | 9.3E-01              | 2.5E-02              | 1.00                 | 1.00      | 0.20      | 1.00     |
| 1373648_at   | similar to Protein C6orf142 homolog                                                            | LOC681849            | 681849         | 0.75          | 0.11             | 2.4E-01              | 9.9E-04              | 1.00                 | 1.00      | 1.00      | 1.00     |
| 1372383_at   | G-protein signalling modulator 1 (AGS3-like, C. elegans)                                       | Gpsm1                | 246254         | 0.97          | 0.11             | 9.4E-01              | 3.7E-04              | 1.00                 | 1.00      | 1.00      | 1.00     |
| 1375990_a_at | Transcribed locus                                                                              |                      |                | 0.91          | 0.11             | 7.3E-01              | 3.7E-04              | 1.00                 | 1.00      | 1.00      | 1.00     |
| 1374099_at   | nebulin-related anchoring protein (predicted)                                                  | Nrap_predicted       | 307982         | 1.63          | 0.11             | 1.8E-01              | 1.5E-03              | 1.00                 | 1.00      | 1.00      | 1.00     |
| 1372790_at   | Malate dehydrogenase 1, NAD (soluble)                                                          | Mdh1                 | 24551          | 0.86          | 0.11             | 5.8E-01              | 1.9E-04              | 1.00                 | 1.00      | 1.00      | 1.00     |
| 1372162_at   | acyl-CoA synthetase short-chain family member 1 (predicted)                                    | Acs1_predicted       | 296259         | 1.22          | 0.11             | 6.5E-01              | 2.7E-03              | 1.00                 | 1.00      | 0.70      | 1.00     |
| 1367742_at   | carnitine palmitoyltransferase 1b, muscle                                                      | Cpt1b                | 25756          | 0.96          | 0.11             | 9.5E-01              | 2.1E-04              | 1.00                 | 1.00      | 1.00      | 1.00     |
| 1375031_at   | Transcribed locus, moderately similar to XP_342453.2 titin [Rattus norvegicus]                 |                      |                | 1.08          | 0.11             | 8.1E-01              | 4.6E-04              | 1.00                 | 1.00      | 0.70      | 1.00     |
| 1387271_at   | phytanoyl-CoA hydroxylase                                                                      | Phyh                 | 114209         | 0.69          | 0.10             | 2.9E-01              | 4.9E-04              | 1.00                 | 1.00      | 1.00      | 1.00     |
| 1369313_at   | four and a half LIM domains 2                                                                  | Fhl2                 | 63839          | 1.16          | 0.10             | 6.2E-01              | 2.9E-04              | 1.00                 | 1.00      | 1.00      | 1.00     |
| 1369126_at   | prostaglandin F receptor                                                                       | Ptgrf                | 25652          | 0.50          | 0.10             | 6.5E-01              | 2.4E-02              | 0.00                 | 0.25      | 0.00      | 0.50     |
| 1370982_at   | muscle glycogen phosphorylase                                                                  | Pygm                 | 24701          | 1.15          | 0.10             | 5.9E-01              | 8.1E-04              | 1.00                 | 1.00      | 0.60      | 1.00     |
| 1383060_at   | G kinase anchoring protein 1                                                                   | Gkap1                | 361202         | 1.22          | 0.10             | 6.2E-01              | 9.2E-03              | 0.40                 | 0.00      | 0.00      | 0.75     |
| 1374148_at   | Microtubule-associated protein tau                                                             | Mapt                 | 29477          | 0.61          | 0.10             | 1.4E-01              | 4.8E-04              | 0.60                 | 1.00      | 0.00      | 0.63     |
| 1387071_a_at | microtubule-associated protein tau                                                             | Mapt                 | 29477          | 1.11          | 0.10             | 8.0E-01              | 1.9E-02              | 0.90                 | 0.88      | 0.20      | 1.00     |
| 1374190_at   | citrate lyase beta like                                                                        | Clybl                | 306198         | 0.93          | 0.10             | 8.2E-01              | 8.9E-03              | 1.00                 | 1.00      | 0.00      | 1.00     |
| 1373882_at   | Transcribed locus                                                                              |                      |                | 0.96          | 0.10             | 9.5E-01              | 1.6E-02              | 0.10                 | 0.25      | 0.40      | 1.00     |
| 1388153_at   | acyl-CoA synthetase long-chain family member 1                                                 | Acs1                 | 25288          | 0.87          | 0.10             | 6.6E-01              | 3.9E-04              | 1.00                 | 1.00      | 0.80      | 1.00     |
| 1386911_at   | ATPase, Na+/K+ transporting, alpha 2 polypeptide                                               | Atp1a2               | 24212          | 0.81          | 0.10             | 3.6E-01              | 5.6E-04              | 1.00                 | 1.00      | 1.00      | 1.00     |
| 1390365_at   | leukocyte receptor cluster (LRC) member 1 (predicted)                                          | Leng1_predicted      | 292535         | 0.64          | 0.10             | 4.8E-01              | 2.9E-04              | 0.20                 | 0.50      | 0.00      | 0.75     |
| 1374816_at   | similar to hypothetical protein FLJ30973                                                       | LOC363091            | 363091         | 1.07          | 0.10             | 8.4E-01              | 1.1E-04              | 1.00                 | 1.00      | 1.00      | 1.00     |
| 1385249_at   | Kruppel-like factor 15                                                                         | Klf15                | 85497          | 0.87          | 0.10             | 6.3E-01              | 1.1E-03              | 1.00                 | 1.00      | 0.50      | 1.00     |
| 1388876_at   | Transcribed locus                                                                              |                      |                | 0.83          | 0.10             | 5.0E-01              | 1.0E-03              | 1.00                 | 1.00      | 1.00      | 1.00     |
| 1368542_at   | zinc finger protein 423                                                                        | Zfp423               | 94188          | 0.96          | 0.09             | 9.4E-01              | 1.9E-02              | 0.90                 | 1.00      | 0.00      | 1.00     |
| 1374616_at   | platelet-derived growth factor receptor-like                                                   | Pdgfrl               | 290771         | 0.79          | 0.09             | 8.4E-01              | 4.0E-02              | 0.00                 | 0.00      | 0.00      | 0.63     |
| 1374895_at   | myomesin 1 (sklemin) 18kDa                                                                     | Myom1                | 316740         | 1.09          | 0.09             | 8.7E-01              | 1.2E-03              | 1.00                 | 1.00      | 1.00      | 1.00     |
| 1367626_at   | creatine kinase, muscle                                                                        | Ckm                  | 24265          | 1.00          | 0.09             | 9.9E-01              | 4.1E-04              | 1.00                 | 1.00      | 1.00      | 1.00     |
| 1386907_at   | Carboxypeptidase D                                                                             | Cpd                  | 25306          | 1.29          | 0.09             | 6.2E-01              | 9.3E-04              | 1.00                 | 1.00      | 1.00      | 1.00     |
| 1367880_at   | laminin, beta 2                                                                                | Lamb2                | 25473          | 1.06          | 0.09             | 8.8E-01              | 3.5E-04              | 1.00                 | 1.00      | 1.00      | 1.00     |
| 1371801_at   | myozenin 2 (predicted)                                                                         | Myoz2_predicted      | 295426         | 0.87          | 0.09             | 6.1E-01              | 1.1E-03              | 1.00                 | 1.00      | 1.00      | 1.00     |
| 1367660_at   | fatty acid binding protein 3                                                                   | Fabp3                | 79131          | 0.68          | 0.09             | 2.5E-01              | 1.0E-03              | 1.00                 | 1.00      | 1.00      | 1.00     |
| 1386961_at   | phosphofructokinase, muscle                                                                    | Pfkm                 | 65152          | 1.42          | 0.09             | 3.9E-01              | 1.6E-04              | 1.00                 | 1.00      | 0.00      | 1.00     |
| 1389532_at   | Nebulette (predicted)                                                                          | Neb1_predicted       | 307189         | 1.32          | 0.09             | 3.7E-01              | 1.1E-03              | 1.00                 | 1.00      | 0.00      | 1.00     |
| 1370739_x_at | triadin                                                                                        | Trdn                 | 59299          | 1.26          | 0.09             | 3.7E-01              | 6.5E-04              | 1.00                 | 0.80      | 0.80      | 1.00     |
| 1391428_at   | Transcribed locus                                                                              |                      |                | 0.52          | 0.09             | 3.4E-01              | 1.7E-05              | 1.00                 | 1.00      | 0.70      | 1.00     |
| 1389488_at   | Transcribed locus                                                                              |                      |                | 1.06          | 0.09             | 9.0E-01              | 2.7E-04              | 1.00                 | 1.00      | 1.00      | 1.00     |
| 1389548_at   | alcohol dehydrogenase, iron containing, 1                                                      | Adh1e1               | 362474         | 0.86          | 0.09             | 6.6E-01              | 3.8E-03              | 1.00                 | 1.00      | 0.00      | 0.75     |
| 1388712_at   | pleckstrin homology, Sec7 and coiled-coil domains 3                                            | Pscd3                | 116693         | 0.71          | 0.09             | 8.5E-01              | 2.4E-03              | 0.40                 | 0.25      | 0.00      | 1.00     |
| 1387023_at   | glutathione S-transferase, mu type 3                                                           | Gstm3                | 81869          | 0.82          | 0.09             | 6.7E-01              | 1.8E-03              | 1.00                 | 1.00      | 0.20      | 1.00     |
| 1369210_at   | sodium channel, voltage-gated, type 1, alpha                                                   | Scn1a                | 81574          | 1.10          | 0.09             | 8.5E-01              | 9.1E-03              | 1.00                 | 0.50      | 0.00      | 1.00     |
| 1370939_at   | acyl-CoA synthetase long-chain family member 1                                                 | Acs1                 | 25288          | 0.88          | 0.09             | 5.9E-01              | 2.0E-04              | 1.00                 | 1.00      | 1.00      | 1.00     |
| 1371746_at   | Transcribed locus                                                                              |                      |                | 0.77          | 0.09             | 2.7E-01              | 8.7E-04              | 1.00                 | 1.00      | 1.00      | 1.00     |

| Probe Set ID      | Gene Title                                                                                                          | Gene Symbol          | Entrez Gene ID | Fold Change   |                  | False Discovery Rate |                      | Average Present Call |           |           |          |
|-------------------|---------------------------------------------------------------------------------------------------------------------|----------------------|----------------|---------------|------------------|----------------------|----------------------|----------------------|-----------|-----------|----------|
|                   |                                                                                                                     |                      |                | Strain Effect | Rejection Effect | Native BN / DA       | Allograft / Isograft | Native BN            | Native DA | Allograft | Isograft |
| 1367989_at        | solute carrier family 2 (facilitated glucose transporter), member 4                                                 | Slc2a4               | 25139          | 0.85          | 0.09             | 5.1E-01              | 8.8E-04              | 1.00                 | 1.00      | 1.00      | 1.00     |
| 1376716_at        | Transcribed locus                                                                                                   |                      |                | 0.64          | 0.09             | 3.0E-01              | 8.1E-04              | 0.40                 | 0.75      | 0.00      | 1.00     |
| 1387138_at        | tachykinin 2                                                                                                        | Tac2                 | 29191          | 0.36          | 0.09             | 1.9E-01              | 9.2E-03              | 0.00                 | 0.00      | 0.00      | 0.75     |
| 1372565_at        | HraA serine peptidase 3 (predicted)                                                                                 | HraA_predicted       | 360959         | 1.27          | 0.09             | 5.4E-01              | 1.9E-03              | 1.00                 | 1.00      | 0.20      | 1.00     |
| 1382954_at        | Corin                                                                                                               | Corin                | 289596         | 1.59          | 0.09             | 2.1E-01              | 3.0E-04              | 1.00                 | 1.00      | 0.60      | 1.00     |
| 1367949_at        | proenkephalin 1                                                                                                     | Penk1                | 29237          | 0.61          | 0.09             | 2.9E-01              | 1.5E-03              | 1.00                 | 1.00      | 0.60      | 1.00     |
| 1390716_at        | Transcribed locus                                                                                                   |                      |                | 0.85          | 0.09             | 7.2E-01              | 5.2E-04              | 1.00                 | 1.00      | 0.20      | 1.00     |
| 1388802_at        | brain expressed X-linked 1                                                                                          | Bex1                 | 501625         | 2.00          | 0.09             | 2.2E-01              | 6.4E-04              | 1.00                 | 1.00      | 0.10      | 1.00     |
| 1369326_at        | A kinase (PRKA) anchor protein 6                                                                                    | Akap6                | 64553          | 1.63          | 0.08             | 4.8E-01              | 9.4E-04              | 1.00                 | 0.00      | 0.00      | 1.00     |
| 1389095_at        | bi-regional cell adhesion molecule-related/down-regulated by oncogenes (Cdon) binding protein (predicted)           | Boc_predicted        | 360715         | 0.80          | 0.08             | 8.5E-01              | 7.8E-04              | 0.20                 | 0.00      | 0.00      | 1.00     |
| 1381504_at        | similar to asporin precursor                                                                                        | LOC306805            | 306805         | 0.78          | 0.08             | 5.4E-01              | 1.7E-02              | 0.40                 | 0.25      | 0.10      | 1.00     |
| 1398458_at        | similar to protein kinase, lysine deficient 1; kinase deficient protein (predicted)                                 | RGD1307284_predicted | 306811         | 1.05          | 0.08             | 9.0E-01              | 3.0E-03              | 1.00                 | 1.00      | 0.00      | 1.00     |
| 1386943_at        | plasma membrane protolipid                                                                                          | Plp                  | 64364          | 0.38          | 0.08             | 9.8E-02              | 5.8E-04              | 0.80                 | 1.00      | 0.00      | 1.00     |
| 1374217_at        | similar to chromosome 16 open reading frame 5                                                                       | RGD1310686           | 360480         | 0.77          | 0.08             | 6.5E-01              | 1.3E-03              | 1.00                 | 1.00      | 0.00      | 1.00     |
| 1379884_at        | Aspartate-beta-hydroxylase (predicted)                                                                              | Asph_predicted       | 312981         | 0.94          | 0.08             | 8.7E-01              | 4.4E-04              | 1.00                 | 1.00      | 0.80      | 1.00     |
| 1389066_at        | Down syndrome critical region gene 1-like 1                                                                         | Dscr11               | 140666         | 0.93          | 0.08             | 8.0E-01              | 7.4E-04              | 1.00                 | 1.00      | 1.00      | 1.00     |
| 1388778_at        | Transcribed locus                                                                                                   |                      |                | 0.66          | 0.08             | 1.2E-01              | 2.0E-03              | 1.00                 | 1.00      | 1.00      | 1.00     |
| 1373755_at        | similar to leucine rich repeat containing 39 isoform 2                                                              | LOC686192            | 686192         | 0.83          | 0.08             | 5.5E-01              | 7.0E-04              | 1.00                 | 1.00      | 1.00      | 1.00     |
| 1370310_at        | 3-hydroxy-3-methylglutaryl-Coenzyme A synthase 2                                                                    | Hmgcs2               | 24450          | 0.73          | 0.08             | 7.9E-01              | 1.1E-03              | 0.00                 | 0.00      | 0.00      | 0.75     |
| 1373696_at        | Biconical C homology 1 (Drosophila) (predicted)                                                                     | Bicc1_predicted      | 361832         | 0.73          | 0.08             | 8.4E-02              | 3.6E-04              | 1.00                 | 1.00      | 0.00      | 1.00     |
| 1389362_at        | protein tyrosine phosphatase, non-receptor type 3                                                                   | Ptpn3                | 362524         | 0.68          | 0.08             | 1.4E-01              | 3.6E-04              | 1.00                 | 1.00      | 1.00      | 1.00     |
| 1386865_at        | SPARC-like 1 (mast9, hevjin)                                                                                        | Spnc1                | 25434          | 1.60          | 0.08             | 1.5E-01              | 1.9E-04              | 1.00                 | 1.00      | 1.00      | 1.00     |
| 1372372_at        | similar to Ab2-225                                                                                                  | RGD1306952           | 310201         | 0.60          | 0.07             | 1.8E-01              | 4.8E-04              | 1.00                 | 1.00      | 0.60      | 1.00     |
| 1376746_at        | lactate dehydrogenase D                                                                                             | Ldh                  | 307858         | 0.84          | 0.07             | 7.9E-01              | 1.8E-03              | 1.00                 | 1.00      | 0.00      | 1.00     |
| 1372615_at        | amine oxidase, copper containing 3                                                                                  | Aoc3                 | 29473          | 1.28          | 0.07             | 5.2E-01              | 6.5E-04              | 1.00                 | 1.00      | 0.00      | 1.00     |
| 1374677_at        | similar to Adenylosuccinate synthetase isozyme 1                                                                    | LOC684425            | 684425         | 0.76          | 0.07             | 4.7E-01              | 2.1E-04              | 1.00                 | 1.00      | 1.00      | 1.00     |
| 1370738_a_at      | triadin                                                                                                             | Trdn                 | 59299          | 0.78          | 0.07             | 7.2E-01              | 7.0E-03              | 1.00                 | 1.00      | 0.00      | 1.00     |
| 1389908_at        | Transcribed locus                                                                                                   |                      |                | 1.43          | 0.07             | 6.3E-01              | 3.4E-03              | 0.80                 | 0.38      | 0.00      | 1.00     |
| 1369654_at        | protein kinase, AMP-activated, alpha 2 catalytic subunit                                                            | Prkaa2               | 78975          | 1.74          | 0.07             | 6.2E-02              | 3.6E-02              | 1.00                 | 1.00      | 0.20      | 1.00     |
| 1371472_at        | Transcribed locus                                                                                                   |                      |                | 0.96          | 0.07             | 8.8E-01              | 1.8E-04              | 1.00                 | 1.00      | 1.00      | 1.00     |
| 1389398_at        | ankyrin 1, erythroid                                                                                                | Ank1                 | 306570         | 0.85          | 0.07             | 5.6E-01              | 1.3E-04              | 1.00                 | 1.00      | 0.10      | 1.00     |
| 1373778_at        | Transcribed locus                                                                                                   |                      |                | 1.06          | 0.07             | 9.4E-01              | 4.9E-03              | 1.00                 | 0.00      | 0.00      | 1.00     |
| 1372280_at        | ankyrin repeat and SOCS box-containing protein 2                                                                    | Axb2                 | 299266         | 1.07          | 0.07             | 8.6E-01              | 1.7E-04              | 1.00                 | 1.00      | 0.80      | 1.00     |
| 1373436_at        | similar to RIKEN cDNA 1700040L02 (predicted)                                                                        | RGD1306739_predicted | 361834         | 0.64          | 0.06             | 2.8E-01              | 5.6E-03              | 1.00                 | 1.00      | 0.00      | 1.00     |
| 1374814_at        |                                                                                                                     |                      |                | 0.57          | 0.06             | 6.7E-02              | 9.5E-04              | 1.00                 | 1.00      | 0.70      | 1.00     |
| 1388741_at        | similar to cardiomyopathy associated 5                                                                              | LOC683555            | 683555         | 1.72          | 0.06             | 3.3E-01              | 1.0E-03              | 1.00                 | 1.00      | 0.20      | 1.00     |
| 1382775_at        | ryanodine receptor 2, cardiac                                                                                       | Ryr2                 | 498783         | 1.19          | 0.06             | 7.7E-01              | 1.4E-02              | 1.00                 | 1.00      | 0.40      | 1.00     |
| 1375983_at        | MAM domain containing 2                                                                                             | Mamdc2               | 309410         | 0.67          | 0.06             | 7.0E-01              | 2.9E-04              | 0.20                 | 0.25      | 0.00      | 1.00     |
| 1372737_at        | Similar to mKIAA0613 protein (predicted)                                                                            | RGD1564875_predicted | 498587         | 1.42          | 0.06             | 3.1E-01              | 6.4E-04              | 1.00                 | 1.00      | 0.00      | 1.00     |
| 1377499_a_at      | histidine rich calcium binding protein                                                                              | Hrc                  | 292905         | 0.95          | 0.06             | 8.4E-01              | 8.6E-04              | 1.00                 | 1.00      | 0.80      | 1.00     |
| 1390461_at        | Transcribed locus                                                                                                   |                      |                | 0.34          | 0.06             | 2.0E-01              | 1.1E-04              | 0.00                 | 0.00      | 0.00      | 1.00     |
| 1368380_at        | vitronectin                                                                                                         | Vtn                  | 29169          | 0.82          | 0.06             | 5.2E-01              | 1.7E-03              | 1.00                 | 1.00      | 0.00      | 1.00     |
| 1371984_at        | similar to mKIAA0613 protein (predicted)                                                                            | RGD1564875_predicted | 498587         | 1.10          | 0.06             | 5.9E-01              | 5.7E-04              | 1.00                 | 1.00      | 1.00      | 1.00     |
| 1374672_at        | cardiac ankyrin repeat kinase                                                                                       | CarK                 | 295531         | 1.15          | 0.06             | 6.3E-01              | 1.6E-04              | 1.00                 | 1.00      | 0.20      | 1.00     |
| 1389707_at        | Transcribed locus                                                                                                   |                      |                | 3.94          | 0.06             | 1.5E-01              | 2.3E-04              | 0.20                 | 0.00      | 0.00      | 0.75     |
| 1388557_at        | complement component 7                                                                                              | C7                   | 117517         | 1.25          | 0.06             | 5.4E-01              | 2.9E-03              | 1.00                 | 1.00      | 1.00      | 1.00     |
| 1390473_at        | potassium voltage-gated channel, subfamily G, member 2                                                              | Kcng2                | 307234         | 0.83          | 0.05             | 6.6E-01              | 7.6E-03              | 1.00                 | 1.00      | 0.00      | 1.00     |
| 1371732_at        | dermatopontin (predicted)                                                                                           | Dpt_predicted        | 289178         | 0.90          | 0.05             | 5.4E-01              | 8.6E-04              | 1.00                 | 1.00      | 1.00      | 1.00     |
| 1373108_at        | protein phosphatase 1, regulatory (inhibitor) subunit 3C                                                            | Ppp1r3c              | 309513         | 1.43          | 0.05             | 2.1E-01              | 5.4E-03              | 1.00                 | 1.00      | 0.00      | 1.00     |
| 1373987_at        | Kv channel-interacting protein 2                                                                                    | Kenip2               | 56817          | 1.30          | 0.05             | 4.9E-01              | 1.8E-03              | 1.00                 | 1.00      | 0.70      | 1.00     |
| 1377065_at        | Transcribed locus, strongly similar to XP_573855.1 similar to chromosome 10 open reading frame 71                   |                      |                | 0.90          | 0.05             | 6.5E-01              | 1.5E-03              | 1.00                 | 1.00      | 0.00      | 1.00     |
| 1389808_at        | hypothetical protein LOC688274                                                                                      | LOC688274            | 688274         | 0.53          | 0.05             | 2.4E-01              | 1.5E-03              | 1.00                 | 1.00      | 0.00      | 1.00     |
| 1389306_at        | Transcribed locus, weakly similar to XP_001073995.1 similar to Prostatic steroid-binding protein C1 chain precursor | Cd151                | 64315          | 1.13          | 0.05             | 9.4E-01              | 2.8E-04              | 1.00                 | 0.13      | 0.00      | 1.00     |
| 1376884_a_at      | ribosomal protein L3-like (predicted)                                                                               | Rpl3_predicted       | 287122         | 0.93          | 0.05             | 7.9E-01              | 6.2E-04              | 1.00                 | 1.00      | 0.60      | 1.00     |
| 1389079_at        | dehydrogenase/reductase (SDR family) member 7C (predicted)                                                          | Dhrs7c_predicted     | 287411         | 0.64          | 0.05             | 2.9E-01              | 2.5E-03              | 1.00                 | 1.00      | 0.50      | 1.00     |
| 1370363_at        | carboxylesterase 3                                                                                                  | Ces3                 | 113902         | 0.83          | 0.05             | 6.4E-01              | 3.8E-03              | 1.00                 | 1.00      | 0.00      | 1.00     |
| 1392652_at        | Transcribed locus                                                                                                   |                      |                | 0.85          | 0.05             | 7.9E-01              | 4.4E-03              | 0.80                 | 1.00      | 0.00      | 1.00     |
| 1389095_at        |                                                                                                                     |                      |                | 1.58          | 0.05             | 1.7E-01              | 2.4E-03              | 1.00                 | 1.00      | 0.00      | 1.00     |
| 1390450_a_at      | osteglycin (predicted)                                                                                              | Ogn_predicted        | 291015         | 1.12          | 0.04             | 8.6E-01              | 3.1E-03              | 1.00                 | 1.00      | 0.40      | 1.00     |
| 1375303_at        | similar to mKIAA0613 protein (predicted)                                                                            | RGD1564875_predicted | 498587         | 0.96          | 0.04             | 9.3E-01              | 1.9E-04              | 1.00                 | 1.00      | 1.00      | 1.00     |
| 1374168_at        | Transcribed locus                                                                                                   |                      |                | 0.41          | 0.04             | 1.4E-02              | 1.3E-03              | 1.00                 | 1.00      | 0.00      | 1.00     |
| 1385248_a_at      | osteglycin (predicted)                                                                                              | Ogn_predicted        | 291015         | 1.98          | 0.04             | 2.8E-01              | 2.9E-03              | 1.00                 | 1.00      | 0.00      | 1.00     |
| 1389448_at        | septin 4                                                                                                            | Sept4                | 287606         | 0.71          | 0.04             | 5.0E-01              | 6.7E-04              | 1.00                 | 1.00      | 0.00      | 1.00     |
| 1375982_at        | similar to mKIAA0613 protein (predicted)                                                                            | RGD1564875_predicted | 498587         | 0.83          | 0.04             | 5.6E-01              | 8.4E-04              | 1.00                 | 1.00      | 0.60      | 1.00     |
| 1371700_at        | microfibrillar-associated protein 4                                                                                 | Mfap4                | 287382         | 0.55          | 0.03             | 3.2E-01              | 4.9E-03              | 0.90                 | 1.00      | 0.40      | 1.00     |
| 1368093_at        | myosin, heavy polypeptide 6, cardiac muscle, alpha                                                                  | Myh6                 | 29556          | 0.60          | 0.03             | 1.8E-01              | 3.1E-03              | 1.00                 | 1.00      | 1.00      | 1.00     |
| 1391007_s_at      | potassium inwardly rectifying channel, subfamily J, member 11                                                       | Kcnj11               | 83535          | 0.79          | 0.02             | 5.5E-01              | 1.3E-04              | 1.00                 | 1.00      | 0.00      | 1.00     |
| 1389464_at        | ligand of numb-protein X 1 (predicted)                                                                              | Lnx1_predicted       | 360926         | 0.71          | 0.02             | 1.2E-01              | 4.4E-05              | 1.00                 | 1.00      | 0.00      | 1.00     |
| 1383263_at        | osteglycin (predicted)                                                                                              | Ogn_predicted        | 291015         | 0.46          | 0.01             | 9.8E-02              | 9.5E-04              | 0.50                 | 1.00      | 0.00      | 1.00     |
| 1367951_at        | phosphoglycerate mutase 2                                                                                           | Pgam2                | 24959          | 0.61          | 0.01             | 3.3E-01              | 1.1E-03              | 1.00                 | 1.00      | 0.00      | 1.00     |
| 1387049_at        | Sideroflexin 2                                                                                                      | Sfxn2                | 294011         | 1.24          | 0.01             | 7.0E-01              | 4.4E-05              | 1.00                 | 1.00      | 0.00      | 1.00     |
| <b>C. Overlap</b> |                                                                                                                     |                      |                |               |                  |                      |                      |                      |           |           |          |
| 1370428_x_at      | RT1 class Ib, locus Aw2                                                                                             | RT1-Aw2              | 24737          | 42.93         | 57.55            | 3.1E-03              | 4.4E-05              | 1.00                 | 0.25      | 1.00      | 0.75     |
| 1367928_at        | myosin, heavy polypeptide 7, cardiac muscle, beta                                                                   | Myh7                 | 29557          | 9.20          | 0.17             | 2.6E-02              | 1.3E-02              | 1.00                 | 1.00      | 1.00      | 1.00     |
| 1371237_a_at      | metallothionein 1a                                                                                                  | Mt1a                 | 24567          | 4.65          | 6.04             | 3.9E-02              | 4.1E-04              | 1.00                 | 1.00      | 1.00      | 1.00     |
| 1370773_a_at      | Kv channel-interacting protein 2                                                                                    | Kenip2               | 56817          | 3.82          | 0.10             | 4.4E-02              | 2.5E-03              | 1.00                 | 1.00      | 0.00      | 1.00     |

| Probe Set ID | Gene Title                                                                            | Gene Symbol      | Fold Change   |                  | False Discovery Rate |                      | Average Present Call |           |           |          |      |
|--------------|---------------------------------------------------------------------------------------|------------------|---------------|------------------|----------------------|----------------------|----------------------|-----------|-----------|----------|------|
|              |                                                                                       |                  | Strain Effect | Rejection Effect | Native BN / DA       | Allograft / Isograft | Native BN            | Native DA | Allograft | Isograft |      |
| 1369050_at   | phosphatidylinositol 3-kinase, C2 domain containing, gamma polypeptide                | Pik3c2g          | 116720        | 0.30             | 0.23                 | 2.5E-03              | 5.1E-03              | 0.00      | 1.00      | 0.20     | 1.00 |
| 1368304_at   | flavin containing monooxygenase 3                                                     | Fmo3             | 84493         | 0.26             | 0.06                 | 8.5E-02              | 1.1E-03              | 0.00      | 1.00      | 0.00     | 1.00 |
| 1376749_at   | osteglycin (predicted)                                                                | Ogn_predicted    | 291015        | 0.23             | 0.03                 | 8.4E-03              | 1.4E-04              | 1.00      | 1.00      | 0.80     | 1.00 |
| 1370176_at   | trafficking protein, kinesin binding 2                                                | Trak2            | 171086        | 0.22             | 0.22                 | 4.4E-04              | 2.3E-04              | 1.00      | 1.00      | 1.00     | 1.00 |
| 1375861_at   | similar to nucleosome assembly protein 1-like 5                                       | LOC682844        | 682844        | 0.17             | 0.17                 | 3.8E-02              | 1.3E-03              | 0.30      | 1.00      | 0.00     | 1.00 |
| 1371245_a_at | beta-globin                                                                           | LOC689064        | 689064        | 0.08             | 0.16                 | 9.1E-03              | 1.3E-02              | 1.00      | 1.00      | 1.00     | 1.00 |
| 1374527_at   | enoyl Coenzyme A hydratase domain containing 2 (predicted)                            | Echdc2_predicted | 298381        | 0.01             | 0.15                 | 9.3E-06              | 2.1E-03              | 0.00      | 1.00      | 0.00     | 1.00 |
| 1368637_at   | caspase recruitment domain family, member 9                                           | Cad9             | 64171         | 0.02             | 0.09                 | 1.0E-02              | 2.9E-03              | 0.00      | 1.00      | 0.00     | 1.00 |
| 1393130_at   | Regulator of chromosome condensation (RCC1) and BTB (POZ) domain containing protein 1 | Rchb1            | 361050        | 0.02             | 0.07                 | 4.4E-04              | 1.4E-04              | 0.00      | 1.00      | 0.20     | 1.00 |
