# Supplementary material for: Impact of animal strain on gene expression in a rat model of acute cardiac rejection
Source: PubMed Central journal article supplement (PMC2711118; doi:10.1186/1471-2164-10-280), 2009-06-24
Supplement: 1471-2164-10-280-S2.pdf [file 1471-2164-10-280-S2.pdf]

**Additional File 2. Peripheral Blood Mononuclear Cells: Alterations in Gene Expression due to Strain Effect and Strain + Rejection Effect (color coded based on Venn diagram, Figure 3B)**

| Probe Set ID            | Gene Title                                                                                            | Gene Symbol           | Fold Change    |                         | False Discovery Rate |                         | Average Present Call |           |           |           |          |  |
|-------------------------|-------------------------------------------------------------------------------------------------------|-----------------------|----------------|-------------------------|----------------------|-------------------------|----------------------|-----------|-----------|-----------|----------|--|
|                         |                                                                                                       |                       | Strain Effect  | Strain+Rejection Effect | Strain Effect        | Strain+Rejection Effect | Native BN            | Native DA | Allograft | Isograft  |          |  |
|                         |                                                                                                       |                       | Entrez Gene ID | Native BN / DA          | Allograft / Isograft | Native BN / DA          | Allograft / Isograft | Native BN | Native DA | Allograft | Isograft |  |
| <b>A. Strain Effect</b> |                                                                                                       |                       |                |                         |                      |                         |                      |           |           |           |          |  |
| 1368053_at              | par-3 (partitioning defective 3) homolog (C. elegans)                                                 | Pard3                 | 81918          | 24.70                   | 13.34                | 3.0E-02                 | 8.7E-05              | 1.00      | 0.00      | 0.20      | 0.00     |  |
| 1375497_at              | Transcribed locus                                                                                     |                       |                | 21.16                   | 2.99                 | 2.8E-02                 | 2.6E-02              | 0.50      | 0.00      | 0.10      | 0.00     |  |
| 1394841_at              | Translocase of inner mitochondrial membrane 9 homolog (yeast)                                         | Timm9                 | 171139         | 17.91                   | 2.20                 | 4.8E-02                 | 1.5E-01              | 0.67      | 0.00      | 0.00      | 0.00     |  |
| 1371621_at              | Transcribed locus                                                                                     |                       |                | 10.39                   | 2.18                 | 4.6E-02                 | 2.8E-01              | 1.00      | 0.00      | 0.60      | 0.00     |  |
| 1375842_at              | similar to Glycoporin                                                                                 | LOC688972             | 688972         | 10.07                   | 0.55                 | 7.1E-02                 | 4.2E-01              | 1.00      | 0.33      | 1.00      | 1.00     |  |
| 1378865_at              | Transcribed locus                                                                                     |                       |                | 9.24                    | 0.80                 | 4.1E-02                 | 6.2E-01              | 0.50      | 0.00      | 0.00      | 0.00     |  |
| 1371527_at              | epithelial membrane protein 1                                                                         | Emp1                  | 25314          | 6.72                    | 3.00                 | 2.5E-02                 | 2.2E-04              | 1.00      | 1.00      | 1.00      | 1.00     |  |
| 1381532_at              | Lymphoid enhancer binding factor 1                                                                    | Lef1                  | 161452         | 6.25                    | 7.42                 | 7.8E-02                 | 1.6E-02              | 1.00      | 0.00      | 0.00      | 0.00     |  |
| 1398365_at              | similar to RIKEN cDNA 2700055K07                                                                      | RGDI1305061           | 291966         | 5.80                    | 2.34                 | 3.9E-02                 | 1.4E-03              | 1.00      | 0.00      | 1.00      | 0.11     |  |
| 1369555_at              | chemokine (C-C motif) receptor 4                                                                      | Ccr4                  | 171054         | 5.56                    | 3.33                 | 5.1E-02                 | 1.8E-03              | 1.00      | 0.00      | 0.00      | 0.00     |  |
| 1371947_at              | necln                                                                                                 | Ndn                   | 308690         | 5.00                    | 1.71                 | 6.1E-02                 | 3.7E-01              | 0.67      | 0.00      | 0.00      | 0.00     |  |
| 1386420_at              | Transcribed locus                                                                                     |                       |                | 5.00                    | 1.99                 | 3.3E-02                 | 3.0E-01              | 1.00      | 0.00      | 1.00      | 0.50     |  |
| 1390119_at              | secreted frizzled-related protein 2                                                                   | Sfrp2                 | 310552         | 4.99                    | 2.06                 | 3.8E-02                 | 3.4E-02              | 1.00      | 0.67      | 1.00      | 0.00     |  |
| 1395337_at              | microtubule-associated protein 1b                                                                     | Map1b                 | 29456          | 4.99                    | 2.26                 | 5.3E-02                 | 1.7E-01              | 0.50      | 0.00      | 0.40      | 0.00     |  |
| 1378419_at              | pre-ecsinophil-associated ribonuclease-2                                                              | LOC474169             | 474169         | 4.82                    | 1.15                 | 3.2E-02                 | 6.5E-01              | 1.00      | 1.00      | 1.00      | 0.89     |  |
| 1383365_at              | procollagen, type XVII, alpha 1 (predicted)                                                           | Col17a1_predicted     | 294027         | 4.60                    | 2.68                 | 3.6E-02                 | 3.4E-05              | 1.00      | 0.67      | 1.00      | 0.00     |  |
| 1374519_at              | Gamma-glutamyl carboxylase                                                                            | Ggcx                  | 81716          | 4.58                    | 2.10                 | 6.8E-02                 | 2.2E-04              | 1.00      | 0.17      | 1.00      | 0.00     |  |
| 1382153_at              | C-type (calcium dependent, carbohydrate recognition domain) lectin, superfamily member 6              | Clecsf6               | 474143         | 4.58                    | 2.10                 | 4.0E-02                 | 4.8E-02              | 1.00      | 0.50      | 1.00      | 0.78     |  |
| 1368491_at              | deoxyribonuclease II beta                                                                             | Dnase2b               | 59296          | 4.24                    | 1.54                 | 7.2E-02                 | 2.2E-01              | 1.00      | 0.17      | 1.00      | 0.56     |  |
| 1385465_at              | Sialic acid binding Ig-like lectin 5 (predicted)                                                      | Siglec5_predicted     | 292843         | 4.23                    | 2.99                 | 6.9E-02                 | 1.6E-02              | 1.00      | 0.67      | 1.00      | 0.67     |  |
| 1392648_at              | mannose receptor, C type 1 (predicted)                                                                | Mrc1_predicted        | 291327         | 4.18                    | 2.38                 | 9.7E-02                 | 9.8E-03              | 1.00      | 0.67      | 1.00      | 0.44     |  |
| 1369086_a_at            | calcium channel, voltage-dependent, L type, alpha 1D subunit                                          | Cacna1d               | 29716          | 4.08                    | 1.96                 | 6.9E-02                 | 1.9E-02              | 1.00      | 0.00      | 0.40      | 0.06     |  |
| 1396713_at              | Similar to RIKEN cDNA 2610110G12                                                                      | RGDI1303066           | 361789         | 4.02                    | 2.38                 | 3.3E-02                 | 1.7E-02              | 1.00      | 0.00      | 1.00      | 0.17     |  |
| 1386009_at              | Colony stimulating factor 3 receptor (granulocyte) (predicted)                                        | Csf3r_predicted       | 298518         | 3.88                    | 1.93                 | 6.9E-02                 | 5.4E-03              | 1.00      | 1.00      | 1.00      | 1.00     |  |
| 1393227_at              |                                                                                                       |                       |                | 3.87                    | 2.74                 | 5.0E-02                 | 1.2E-03              | 1.00      | 1.00      | 1.00      | 1.00     |  |
| 1369736_at              | epithelial membrane protein 1                                                                         | Emp1                  | 25314          | 3.78                    | 4.67                 | 7.9E-02                 | 1.9E-02              | 1.00      | 0.00      | 0.40      | 0.00     |  |
| 1370613_x_at            | UDP glycosyltransferase 1 family, polypeptide A1                                                      | Ugt1a1                | 113992         | 3.78                    | 2.70                 | 4.6E-02                 | 1.0E-02              | 1.00      | 1.00      | 1.00      | 0.89     |  |
| 1396672_at              |                                                                                                       |                       |                | 3.66                    | 1.30                 | 9.7E-02                 | 1.7E-01              | 1.00      | 1.00      | 1.00      | 0.78     |  |
| 1388728_at              | lysosomal-associated protein transmembrane 4B                                                         | Laptm4b               | 315047         | 3.66                    | 2.40                 | 5.5E-02                 | 5.3E-05              | 1.00      | 1.00      | 1.00      | 1.00     |  |
| 1377671_at              | Transcribed locus                                                                                     |                       |                | 3.55                    | 2.43                 | 2.7E-02                 | 3.8E-03              | 1.00      | 1.00      | 1.00      | 1.00     |  |
| 1387947_at              | v-maf musculoaponeurotic fibrosarcoma oncogene family, protein B (avian)                              | Mafb                  | 54264          | 3.53                    | 1.83                 | 6.3E-02                 | 9.6E-03              | 1.00      | 1.00      | 1.00      | 1.00     |  |
| 1388416_at              | low density lipoprotein receptor-related protein 1                                                    | Lrp1                  | 299858         | 3.52                    | 1.85                 | 5.0E-02                 | 2.1E-03              | 1.00      | 1.00      | 1.00      | 1.00     |  |
| 1368000_at              | complement component 3                                                                                | C3                    | 24232          | 3.51                    | 1.73                 | 2.7E-02                 | 3.6E-02              | 1.00      | 1.00      | 1.00      | 1.00     |  |
| 1375055_at              | similar to JP-45 protein                                                                              | LOC686460             | 686460         | 3.43                    | 4.86                 | 9.3E-02                 | 4.8E-02              | 1.00      | 0.00      | 0.00      | 0.00     |  |
| 1382201_at              | unc-5 homolog C (C. elegans)                                                                          | Unc5c                 | 362049         | 3.42                    | 1.11                 | 9.5E-02                 | 7.4E-01              | 0.83      | 0.00      | 1.00      | 0.89     |  |
| 1383936_at              | Elastin microfibril interactor 2 (predicted)                                                          | Emilin2_predicted     | 316736         | 3.40                    | 2.05                 | 3.7E-02                 | 1.3E-03              | 1.00      | 1.00      | 1.00      | 1.00     |  |
| 1395301_x_at            | Transcribed locus, strongly similar to XP_580064.1 hypothetical protein XP_580064 [Rattus norvegicus] | Fbxh4_predicted       | 313101         | 3.38                    | 2.19                 | 3.3E-02                 | 7.9E-04              | 1.00      | 1.00      | 1.00      | 1.00     |  |
| 1395788_at              | Transcribed locus                                                                                     |                       |                | 3.35                    | 2.31                 | 6.3E-02                 | 3.2E-01              | 1.00      | 0.00      | 0.00      | 0.00     |  |
| 1394611_at              |                                                                                                       |                       |                | 3.30                    | 1.66                 | 6.3E-02                 | 2.7E-02              | 1.00      | 0.00      | 1.00      | 0.61     |  |
| 1372691_at              | uridine phosphorylase 1                                                                               | Upp1                  | 289801         | 3.29                    | 2.36                 | 3.8E-02                 | 4.5E-03              | 1.00      | 0.50      | 1.00      | 1.00     |  |
| 1376771_at              | Transcribed locus                                                                                     |                       |                | 3.27                    | 1.35                 | 4.8E-02                 | 6.3E-01              | 1.00      | 0.00      | 0.60      | 0.22     |  |
| 1369375_a_at            | calpain 3                                                                                             | Capn3                 | 29155          | 3.26                    | 1.55                 | 5.8E-02                 | 1.1E-01              | 1.00      | 1.00      | 1.00      | 0.67     |  |
| 1388272_at              | immunoglobulin heavy chain 1a (serum IgG2a)                                                           | Igh-1a                | 299352         | 3.21                    | 0.46                 | 4.1E-02                 | 1.7E-01              | 1.00      | 1.00      | 1.00      | 1.00     |  |
| 1382905_at              | Collagen-binding factor Endo180                                                                       | Endo180               | 498011         | 3.21                    | 1.28                 | 2.8E-02                 | 4.0E-01              | 1.00      | 1.00      | 1.00      | 1.00     |  |
| 1378285_at              | natural cytotoxicity triggering receptor 3                                                            | Ncr3                  | 294251         | 3.20                    | 1.97                 | 3.6E-02                 | 5.5E-03              | 1.00      | 1.00      | 1.00      | 1.00     |  |
| 1387029_at              | complement component factor H                                                                         | Chf                   | 155012         | 3.19                    | 2.32                 | 7.8E-02                 | 1.2E-03              | 1.00      | 1.00      | 1.00      | 1.00     |  |
| 1368393_at              | complement component 1, q subcomponent, receptor 1                                                    | C1qr1                 | 84398          | 3.17                    | 2.25                 | 6.0E-02                 | 1.0E-02              | 1.00      | 1.00      | 1.00      | 1.00     |  |
| 1390102_at              | disrupted in renal carcinoma 2 homolog (human)                                                        | Dirc2                 | 303902         | 3.15                    | 2.44                 | 3.3E-02                 | 9.4E-05              | 1.00      | 1.00      | 1.00      | 1.00     |  |
| 1377064_at              | dual specificity phosphatase 6                                                                        | Dusp6                 | 116663         | 3.12                    | 1.93                 | 6.1E-02                 | 2.7E-02              | 1.00      | 1.00      | 1.00      | 1.00     |  |
| 1374794_at              | kinesin family member 15                                                                              | Kif15                 | 353302         | 3.12                    | 2.36                 | 3.0E-02                 | 3.9E-04              | 1.00      | 1.00      | 1.00      | 0.78     |  |
| 1373204_at              | hypothetical LOC297077                                                                                | RGDI1310725           | 297077         | 3.06                    | 2.34                 | 4.6E-02                 | 6.4E-04              | 1.00      | 1.00      | 1.00      | 1.00     |  |
| 1378418_at              | similar to MGC37193 protein                                                                           | RGDI1311681           | 364674         | 3.06                    | 2.54                 | 6.3E-02                 | 4.9E-04              | 1.00      | 1.00      | 1.00      | 1.00     |  |
| 1379625_at              | Transcribed locus                                                                                     |                       |                | 3.06                    | 1.50                 | 3.8E-02                 | 2.1E-01              | 1.00      | 0.00      | 0.80      | 0.72     |  |
| 1370491_a_at            | histidine decarboxylase                                                                               | Hdc                   | 24443          | 3.04                    | 2.30                 | 8.3E-02                 | 1.2E-02              | 1.00      | 0.00      | 0.50      | 0.00     |  |
| 1369089_at              | protein kinase C, gamma                                                                               | Pkcc                  | 24681          | 3.04                    | 1.19                 | 9.1E-02                 | 5.0E-01              | 0.83      | 0.00      | 0.00      | 0.00     |  |
| 1385129_at              | similar to mitochondrial glycerol 3-phosphate acyltransferase (predicted)                             | RGDI1304904_predicted | 296130         | 3.02                    | 2.30                 | 3.8E-02                 | 1.2E-01              | 1.00      | 0.50      | 0.80      | 0.17     |  |
| 1379642_at              | Transcribed locus                                                                                     |                       |                | 3.02                    | 2.28                 | 7.7E-02                 | 4.2E-04              | 1.00      | 1.00      | 1.00      | 1.00     |  |
| 1373082_at              | Transcribed locus                                                                                     |                       |                | 0.33                    | 0.36                 | 6.8E-02                 | 4.2E-04              | 0.00      | 0.67      | 0.00      | 1.00     |  |
| 1384180_at              | interferon-induced protein with tetratricopeptide repeats 2                                           | Ifit2                 | 294091         | 0.33                    | 0.66                 | 8.9E-02                 | 8.7E-02              | 1.00      | 1.00      | 1.00      | 1.00     |  |
| 1371951_at              | Transcribed locus                                                                                     |                       |                | 0.33                    | 0.57                 | 3.4E-02                 | 2.7E-02              | 1.00      | 1.00      | 1.00      | 1.00     |  |
| 1391495_at              | Similar to RIKEN cDNA 2010012005 (predicted)                                                          | RGDI1311783_predicted | 294012         | 0.33                    | 0.78                 | 1.9E-02                 | 1.5E-01              | 1.00      | 1.00      | 0.40      | 1.00     |  |
| 1393887_at              | choline phosphotransferase 1                                                                          | Chpt1                 | 362866         | 0.33                    | 0.43                 | 8.1E-02                 | 2.5E-03              | 0.00      | 1.00      | 0.50      | 0.61     |  |
| 1387831_at              | Inhibitor of Bruton agammaglobulinemia tyrosine kinase (predicted)                                    | Ibk_predicted         | 315858         | 0.32                    | 0.34                 | 2.9E-02                 | 3.3E-03              | 1.00      | 1.00      | 1.00      | 1.00     |  |
| 1394154_at              | Transcribed locus                                                                                     |                       |                | 0.32                    | 0.87                 | 6.8E-02                 | 6.2E-01              | 0.17      | 1.00      | 0.30      | 0.44     |  |
| 1389832_at              | glutathione S-transferase omega 1                                                                     | Gsto1                 | 114846         | 0.32                    | 0.47                 | 3.0E-02                 | 1.8E-04              | 1.00      | 1.00      | 1.00      | 1.00     |  |
| 1383503_at              | Transcribed locus                                                                                     |                       |                | 0.32                    | 0.67                 | 5.5E-02                 | 3.7E-02              | 0.33      | 1.00      | 0.20      | 1.00     |  |
| 1377697_at              | similar to amyloid beta (A4) precursor protein-binding, family B, member 2 (predicted)                | RGDI1562438_predicted | 305338         | 0.32                    | 0.36                 | 2.5E-02                 | 1.0E-03              | 1.00      | 1.00      | 1.00      | 1.00     |  |
| 1379285_at              | receptor transporter protein 4 (predicted)                                                            | Rtp4_predicted        | 360733         | 0.31                    | 0.64                 | 3.5E-02                 | 1.1E-01              | 1.00      | 1.00      | 1.00      | 1.00     |  |
| 1383393_at              | Transcribed locus                                                                                     |                       |                | 0.31                    | 0.62                 | 4.4E-02                 | 1.5E-02              | 1.00      | 1.00      | 1.00      | 1.00     |  |
| 1398664_at              | GRAM domain containing 3                                                                              | Grand3                | 307288         | 0.31                    | 0.34                 | 7.8E-02                 | 1.2E-03              | 1.00      | 1.00      | 0.80      | 1.00     |  |
| 1385643_at              | Transcribed locus                                                                                     |                       |                | 0.31                    | 0.47                 | 7.7E-02                 | 2.6E-02              | 1.00      | 1.00      | 0.20      | 1.00     |  |
| 1397907_at              | Hypothetical protein LOC501546                                                                        | LOC501546             | 501546         | 0.31                    | 0.42                 | 6.4E-02                 | 1.2E-02              | 1.00      | 1.00      | 0.80      | 1.00     |  |
| 1377133_at              | Hypothetical protein LOC680687                                                                        | LOC680687             | 680687         | 0.31                    | 0.43                 | 3.2E-02                 | 2.1E-03              | 1.00      | 1.00      | 0.80      | 1.00     |  |
| 1370628_at              | granzyme B                                                                                            | Gzmb                  | 171528         | 0.30                    | 0.75                 | 6.1E-02                 | 1.8E-01              | 1.00      | 1.00      | 1.00      | 1.00     |  |

| Probe Set ID | Gene Title                                                                                     | Gene Symbol          | Entrez Gene ID | Fold Change   |                         | False Discovery Rate |                      | Average Present Call |           |           |          |
|--------------|------------------------------------------------------------------------------------------------|----------------------|----------------|---------------|-------------------------|----------------------|----------------------|----------------------|-----------|-----------|----------|
|              |                                                                                                |                      |                | Strain Effect | Strain+Rejection Effect | Native BN / DA       | Allograft / Isograft | Native BN            | Native DA | Allograft | Isograft |
| 1369857_at   | solute carrier family 14 (urea transporter), member 1                                          | Scl14a1              | 54301          | 0.30          | 0.62                    | 8.2E-02              | 1.1E-01              | 1.00                 | 1.00      | 0.10      | 0.67     |
| 1384933_at   | Transcribed locus                                                                              |                      |                | 0.30          | 0.35                    | 8.3E-02              | 9.1E-03              | 0.17                 | 1.00      | 0.30      | 1.00     |
| 1383564_at   | interferon regulatory factor 7                                                                 | Irf7                 | 293624         | 0.30          | 0.35                    | 5.1E-02              | 7.6E-05              | 1.00                 | 1.00      | 1.00      | 1.00     |
| 1394500_at   | Transcribed locus                                                                              |                      |                | 0.29          | 0.62                    | 7.6E-02              | 5.4E-03              | 0.33                 | 1.00      | 1.00      | 1.00     |
| 1392745_at   | similar to RIKEN cDNA 3110040N11                                                               | RGD1305713           | 293059         | 0.29          | 0.49                    | 2.6E-02              | 2.7E-02              | 1.00                 | 1.00      | 0.00      | 1.00     |
| 1380415_at   | RT1 class Ib, locus Aw2                                                                        | RT1-Aw2              | 24737          | 0.29          | 0.41                    | 4.2E-02              | 1.1E-05              | 1.00                 | 1.00      | 1.00      | 1.00     |
| 1395116_at   | Procollagen, type IX, alpha 1                                                                  | Col9a1               | 305104         | 0.29          | 0.52                    | 4.0E-02              | 2.1E-04              | 1.00                 | 1.00      | 1.00      | 1.00     |
| 1373028_at   | receptor-like tyrosine kinase                                                                  | Ryk                  | 140585         | 0.29          | 0.40                    | 3.3E-02              | 2.3E-04              | 0.00                 | 1.00      | 0.00      | 1.00     |
| 1397300_at   | Transcribed locus                                                                              |                      |                | 0.29          | 0.54                    | 2.5E-02              | 1.3E-02              | 1.00                 | 1.00      | 1.00      | 1.00     |
| 1383097_at   | similar to RIKEN cDNA 201002C05 (predicted)                                                    | RGD1311783_predicted | 294012         | 0.29          | 0.51                    | 3.5E-02              | 6.1E-03              | 1.00                 | 1.00      | 1.00      | 1.00     |
| 1395274_at   | dystonin (predicted)                                                                           | Dst_predicted        | 316313         | 0.28          | 0.38                    | 4.0E-02              | 5.9E-02              | 1.00                 | 1.00      | 0.40      | 0.78     |
| 1371152_a_at | 2',5'-oligoadenylate synthetase 1, 40/46kDa                                                    | Oas1                 | 192281         | 0.28          | 1.33                    | 4.5E-02              | 2.0E-01              | 1.00                 | 1.00      | 1.00      | 1.00     |
| 1384067_at   | FCH domain only 2 (predicted)                                                                  | Fcho2_predicted      | 309129         | 0.28          | 0.34                    | 5.0E-02              | 2.2E-04              | 0.67                 | 1.00      | 0.90      | 1.00     |
| 1371101_at   | receptor-like tyrosine kinase                                                                  | Ryk                  | 140585         | 0.28          | 0.61                    | 7.3E-02              | 8.1E-02              | 1.00                 | 1.00      | 0.90      | 1.00     |
| 1380888_at   | similar to CG31613-PA                                                                          | LOC684841            | 684841         | 0.28          | 0.36                    | 9.8E-02              | 4.3E-03              | 0.33                 | 1.00      | 0.00      | 1.00     |
| 1370013_at   | cyclic nucleotide gated channel alpha 1                                                        | Cnga1                | 85259          | 0.28          | 0.39                    | 6.6E-02              | 4.9E-04              | 0.17                 | 1.00      | 0.00      | 1.00     |
| 1368762_a_at | ubiquitin D                                                                                    | UblD                 | 29168          | 0.27          | 0.40                    | 4.3E-02              | 1.3E-05              | 0.33                 | 1.00      | 0.40      | 1.00     |
| 1387995_a_at | interferon induced transmembrane protein 3                                                     | Ifim3                | 361673         | 0.27          | 0.89                    | 7.7E-02              | 5.9E-01              | 1.00                 | 1.00      | 1.00      | 1.00     |
| 1380094_at   | Zinc finger protein 212                                                                        | Zfp212               | 297066         | 0.27          | 0.50                    | 2.9E-02              | 2.3E-03              | 0.83                 | 1.00      | 0.40      | 1.00     |
| 1382314_at   | interferon, alpha-inducible protein (clone IFI-15K) (predicted)                                | G1p2_predicted       | 298693         | 0.27          | 0.39                    | 6.0E-02              | 5.5E-04              | 1.00                 | 1.00      | 0.90      | 1.00     |
| 1368409_at   | glutathione S-transferase, theta 2                                                             | Gst2                 | 29487          | 0.27          | 0.29                    | 2.7E-02              | 2.2E-04              | 0.00                 | 1.00      | 0.00      | 0.22     |
| 1371017_at   | Glycerol-3-phosphate acyltransferase, mitochondrial                                            | Gpam                 | 29653          | 0.27          | 0.35                    | 1.4E-02              | 1.4E-04              | 1.00                 | 1.00      | 1.00      | 1.00     |
| 1389470_at   | complement factor B                                                                            | Cfb                  | 294257         | 0.27          | 0.91                    | 6.9E-02              | 7.3E-01              | 0.00                 | 1.00      | 1.00      | 1.00     |
| 1373833_at   | similar to RIKEN cDNA 3110040N11                                                               | RGD1305713           | 293059         | 0.26          | 0.38                    | 3.8E-02              | 5.4E-05              | 1.00                 | 1.00      | 1.00      | 1.00     |
| 1387739_at   | CD8 antigen, beta chain                                                                        | Cd8b                 | 24931          | 0.26          | 0.55                    | 1.4E-02              | 1.4E-03              | 1.00                 | 1.00      | 1.00      | 1.00     |
| 1369877_at   | CD8 antigen, alpha chain                                                                       | Cd8a                 | 24930          | 0.26          | 0.41                    | 2.5E-02              | 3.0E-04              | 1.00                 | 1.00      | 1.00      | 1.00     |
| 1375724_at   | similar to testhymin (predicted)                                                               | RGD1563612_predicted | 500026         | 0.26          | 0.34                    | 2.6E-02              | 1.4E-04              | 1.00                 | 1.00      | 1.00      | 1.00     |
| 1385414_at   | CD8 antigen, alpha chain                                                                       | Cd8a                 | 24930          | 0.25          | 0.39                    | 2.5E-02              | 4.0E-04              | 1.00                 | 1.00      | 1.00      | 1.00     |
| 1387283_at   | myxovirus (influenza virus) resistance 2                                                       | Mx2                  | 286918         | 0.25          | 0.46                    | 7.3E-02              | 1.2E-03              | 1.00                 | 1.00      | 1.00      | 1.00     |
| 1385314_at   | Transcribed locus                                                                              |                      |                | 0.25          | 0.81                    | 5.0E-02              | 1.6E-01              | 1.00                 | 1.00      | 1.00      | 1.00     |
| 1398706_at   | interleukin enhancer binding factor 3                                                          | Ilf3                 | 84472          | 0.24          | 0.60                    | 2.5E-02              | 7.4E-03              | 1.00                 | 1.00      | 1.00      | 1.00     |
| 1387366_at   | similar to Nucleoprotein G2 (predicted)                                                        | RGD1564353_predicted | 300923         | 0.24          | 0.60                    | 1.9E-02              | 2.2E-02              | 1.00                 | 1.00      | 1.00      | 1.00     |
| 1394027_at   | similar to CG3996-PA (predicted)                                                               | RGD1305255_predicted | 299824         | 0.24          | 0.26                    | 3.9E-02              | 4.7E-02              | 0.00                 | 0.83      | 0.00      | 0.06     |
| 1397538_at   | Transcribed locus                                                                              |                      |                | 0.23          | 0.47                    | 6.1E-02              | 7.0E-02              | 1.00                 | 1.00      | 0.80      | 1.00     |
| 1396771_at   | granzyme A                                                                                     | Gzma                 | 266708         | 0.23          | 0.70                    | 3.0E-02              | 1.9E-01              | 1.00                 | 1.00      | 1.00      | 1.00     |
| 1376899_at   | coagulation factor II (thrombin) receptor                                                      | F2r                  | 25439          | 0.23          | 0.41                    | 2.6E-02              | 5.9E-04              | 1.00                 | 1.00      | 1.00      | 1.00     |
| 1393245_at   | Phytanoyl-CoA hydroxylase                                                                      | Phyh                 | 114209         | 0.23          | 0.36                    | 2.3E-02              | 9.9E-06              | 1.00                 | 1.00      | 1.00      | 1.00     |
| 1380638_at   | nuclear receptor coactivator 3                                                                 | Ncoa3                | 84584          | 0.23          | 0.67                    | 4.7E-02              | 9.9E-03              | 1.00                 | 1.00      | 1.00      | 1.00     |
| 1382155_at   | COX15 homolog, cytochrome c oxidase assembly protein (yeast)                                   | Cox15                | 309391         | 0.23          | 0.87                    | 2.9E-02              | 6.0E-01              | 1.00                 | 1.00      | 0.80      | 1.00     |
| 1372002_at   | gap junction membrane channel protein alpha 1                                                  | Gja1                 | 24392          | 0.22          | 0.46                    | 2.5E-02              | 1.2E-03              | 0.33                 | 1.00      | 0.10      | 1.00     |
| 1382024_at   | Similar to RIKEN cDNA 2010315L10 (predicted)                                                   | RGD1306660_predicted | 290627         | 0.22          | 0.61                    | 3.2E-02              | 3.9E-02              | 1.00                 | 1.00      | 1.00      | 1.00     |
| 1397146_at   | Transcribed locus                                                                              |                      |                | 0.22          | 0.41                    | 3.3E-02              | 1.6E-03              | 0.00                 | 0.60      | 1.00      | 0.00     |
| 1392716_at   | granzyme B                                                                                     | Gzmb                 | 171528         | 0.21          | 0.64                    | 4.5E-02              | 4.4E-02              | 1.00                 | 1.00      | 1.00      | 1.00     |
| 1379794_at   | prolycarboxypeptidase (angiotensinase C) (predicted)                                           | Prep_predicted       | 293118         | 0.21          | 1.02                    | 3.2E-02              | 9.7E-01              | 0.00                 | 1.00      | 1.00      | 1.00     |
| 1393657_at   | Transcribed locus                                                                              |                      |                | 0.20          | 0.36                    | 8.9E-02              | 3.4E-04              | 1.00                 | 1.00      | 0.60      | 1.00     |
| 1379436_a_at | RT1 class Ib, locus Aw2                                                                        | RT1-Aw2              | 24737          | 0.20          | 0.40                    | 3.2E-02              | 1.4E-04              | 1.00                 | 1.00      | 0.70      | 1.00     |
| 1368598_at   | somatostatin receptor 3                                                                        | Sstr3                | 171044         | 0.17          | 0.39                    | 7.9E-02              | 4.8E-04              | 1.00                 | 1.00      | 1.00      | 1.00     |
| 1374708_at   | similar to Rho guanine nucleotide exchange factor (GEF) 10 (predicted)                         | RGD1565043_predicted | 306618         | 0.17          | 0.39                    | 4.8E-02              | 1.9E-06              | 1.00                 | 1.00      | 1.00      | 1.00     |
| 1368042_a_at | high mobility group box 1                                                                      | Hmgb1                | 25459          | 0.17          | 0.68                    | 2.7E-02              | 9.4E-03              | 1.00                 | 1.00      | 1.00      | 1.00     |
| 1374015_at   | similar to potassium voltage-gated channel, Isk-related family, member 1-like                  | LOC681190            | 681190         | 0.17          | 0.35                    | 2.6E-02              | 3.5E-04              | 1.00                 | 1.00      | 1.00      | 1.00     |
| 1370822_at   | RT1 class II, locus Ba                                                                         | RT1-Ba               | 309621         | 0.17          | 0.60                    | 3.2E-02              | 8.8E-02              | 1.00                 | 1.00      | 1.00      | 1.00     |
| 1380084_at   | Similar to solute carrier family 25, member 36                                                 | LOC501039            | 501039         | 0.16          | 0.33                    | 7.0E-02              | 2.1E-04              | 0.67                 | 1.00      | 0.80      | 1.00     |
| 1378233_at   | Transcribed locus                                                                              |                      |                | 0.15          | 0.16                    | 9.5E-02              | 1.5E-04              | 0.00                 | 1.00      | 0.00      | 0.17     |
| 1397146_at   | Transcribed locus, weakly similar to XP_917161.1 hypothetical protein XP_912068 [Mus musculus] |                      |                | 0.12          | 0.65                    | 2.1E-02              | 3.9E-01              | 0.00                 | 0.67      | 0.00      | 0.00     |
| 1392707_at   | Similar to CG33154-PB (predicted)                                                              | RGD1310270_predicted | 314798         | 0.12          | 0.58                    | 7.3E-02              | 3.1E-01              | 0.00                 | 0.50      | 0.00      | 0.00     |
| 1396551_at   | Transcribed locus                                                                              |                      |                | 0.11          | 0.37                    | 5.9E-02              | 4.0E-02              | 0.00                 | 1.00      | 0.00      | 0.22     |
| 1398468_at   | Transcribed locus                                                                              |                      |                | 0.11          | 0.41                    | 2.5E-02              | 2.7E-02              | 0.00                 | 0.67      | 0.00      | 0.00     |
| 1394277_at   | interferon-induced protein with tetratricopeptide repeats 3                                    | Ifi3                 | 309526         | 0.11          | 0.72                    | 8.3E-02              | 6.7E-01              | 0.00                 | 0.67      | 0.00      | 0.00     |
| 1376908_at   | Transcribed locus                                                                              |                      |                | 0.11          | 0.35                    | 3.6E-02              | 4.0E-03              | 1.00                 | 1.00      | 1.00      | 1.00     |
| 1380119_at   | Transcribed locus                                                                              |                      |                | 0.10          | 0.34                    | 3.1E-02              | 1.3E-01              | 0.00                 | 0.67      | 0.00      | 0.00     |
| 1397473_at   | distrobrein binding protein 1                                                                  | Dtnbp1               | 641528         | 0.10          | 0.75                    | 9.7E-02              | 3.6E-01              | 0.00                 | 1.00      | 0.00      | 0.00     |
| 1393397_at   | carboxypeptidase A2 (pancreatic) (predicted)                                                   | Cpa2_predicted       | 296959         | 0.09          | 0.15                    | 4.3E-02              | 1.5E-04              | 0.00                 | 0.83      | 0.00      | 0.00     |
| 1379846_at   | Transcribed locus                                                                              |                      |                | 0.07          | 0.23                    | 9.8E-02              | 1.2E-02              | 0.00                 | 1.00      | 0.00      | 0.00     |
| 1375030_at   | Transcribed locus                                                                              |                      |                | 0.07          | 0.17                    | 7.3E-02              | 1.5E-03              | 0.00                 | 1.00      | 0.00      | 0.17     |
| 1395942_at   | Transcribed locus                                                                              |                      |                | 0.07          | 0.69                    | 5.0E-02              | 9.3E-02              | 0.00                 | 1.00      | 0.00      | 0.72     |
| 1376892_at   | CDNA clone IMAGE:7313785                                                                       |                      |                | 0.05          | 0.42                    | 3.2E-02              | 6.1E-04              | 0.00                 | 1.00      | 0.30      | 1.00     |
| 1395888_at   | Thyroid hormone receptor associated protein 6 (predicted)                                      | Thrap6_predicted     | 299905         | 0.04          | 0.27                    | 2.6E-02              | 1.5E-02              | 0.00                 | 0.67      | 0.00      | 0.00     |
| 1390911_at   | RT1 class Ib, locus Aw2                                                                        | RT1-Aw2              | 24737          | 0.03          | 0.03                    | 2.6E-02              | 4.5E-06              | 0.00                 | 1.00      | 0.00      | 0.00     |
| 1378193_at   | membrane-spanning 4-domains, subfamily A, member 7 (predicted)                                 | Msa47_predicted      | 293744         | 0.03          | 0.91                    | 2.9E-02              | 9.3E-01              | 0.00                 | 1.00      | 0.80      | 0.83     |
| 1380651_at   | ring finger protein (CSH2C3 type) 6 (predicted)                                                | Rnf6_predicted       | 304271         | 0.01          | 0.40                    | 9.6E-03              | 1.1E-03              | 0.00                 | 1.00      | 1.00      | 1.00     |

  

| B. Strain+Rejection Effect |                                                          |         |        |      |       |         |         |      |      |      |      |
|----------------------------|----------------------------------------------------------|---------|--------|------|-------|---------|---------|------|------|------|------|
| 1371081_at                 | Rap guanine nucleotide exchange factor (GEF) 4           | Rapgef4 | 252857 | 9.34 | 21.28 | 2.5E-01 | 8.6E-04 | 1.00 | 0.00 | 1.00 | 0.00 |
| 1391018_at                 | Transcribed locus                                        |         |        | 5.52 | 15.12 | 2.2E-01 | 3.5E-03 | 0.67 | 0.00 | 1.00 | 0.00 |
| 1382788_at                 | Major histocompatibility complex, class II, DM beta      | Hla-dmb | 294273 | 4.29 | 9.91  | 1.6E-01 | 8.3E-03 | 0.17 | 0.00 | 0.60 | 0.00 |
| 1370215_at                 | complement component 1, q subcomponent, beta polypeptide | C1qb    | 29687  | 0.39 | 9.82  | 6.9E-01 | 3.6E-02 | 0.00 | 0.00 | 0.80 | 0.00 |

| Probe Set ID | Gene Title                                                                                                  | Gene Symbol          | Entrez Gene ID | Fold Change   |                         | False Discovery Rate |                      | Average Present Call |           |           |          |
|--------------|-------------------------------------------------------------------------------------------------------------|----------------------|----------------|---------------|-------------------------|----------------------|----------------------|----------------------|-----------|-----------|----------|
|              |                                                                                                             |                      |                | Strain Effect | Strain+Rejection Effect | Native BN / DA       | Allograft / Isograft | Native BN            | Native DA | Allograft | Isograft |
| 1394673_at   | similar to Myeloid cell surface antigen CD33 precursor (Siglec-3)                                           | LOC687856            | 687856         | 2.25          | 9.76                    | 3.8E-02              | 1.4E-02              | 1.00                 | 0.33      | 1.00      | 0.00     |
| 1387835_at   | interleukin 1 receptor antagonist                                                                           | Il1rn                | 60582          | 2.40          | 8.15                    | 6.2E-01              | 3.8E-02              | 0.67                 | 0.33      | 1.00      | 0.33     |
| 1378733_at   | Transcribed locus                                                                                           |                      |                | 5.56          | 7.46                    | 3.9E-01              | 9.0E-03              | 1.00                 | 0.00      | 1.00      | 0.00     |
| 1385205_at   | Transcribed locus                                                                                           |                      |                | 6.87          | 7.02                    | 1.4E-01              | 1.4E-04              | 1.00                 | 0.00      | 1.00      | 0.00     |
| 1396420_at   | Bromodomain adjacent to zinc finger domain protein 1B                                                       | Baz1b                | 368002         | 15.86         | 6.15                    | 1.1E-01              | 3.0E-02              | 1.00                 | 0.33      | 0.80      | 0.11     |
| 1376652_at   | complement component 1, q subcomponent, alpha polypeptide                                                   | C1qa                 | 298566         | 0.44          | 5.59                    | 5.7E-01              | 6.1E-02              | 0.00                 | 0.00      | 0.80      | 0.06     |
| 1376100_at   | tubulin, beta 6                                                                                             | Tubb6                | 307351         | 5.50          | 5.45                    | 2.2E-01              | 2.0E-02              | 0.00                 | 0.00      | 0.50      | 0.00     |
| 1387742_at   | chemokine (C-C motif) receptor 2                                                                            | Ccr2                 | 60463          | 4.47          | 5.42                    | 1.3E-01              | 2.8E-03              | 1.00                 | 1.00      | 1.00      | 0.78     |
| 1372060_at   |                                                                                                             |                      |                | 16.09         | 5.04                    | 1.2E-01              | 2.6E-02              | 1.00                 | 0.33      | 1.00      | 0.00     |
| 1368266_at   | arginase 1                                                                                                  | Arg1                 | 29221          | 1.59          | 4.64                    | 7.7E-01              | 7.6E-04              | 0.00                 | 0.00      | 0.80      | 0.00     |
| 1382601_at   | Similar to scavenger receptor type A SR-A (predicted)                                                       | RGD1564316_predicted | 498638         | 1.63          | 4.60                    | 5.7E-01              | 3.0E-02              | 0.33                 | 0.00      | 1.00      | 0.33     |
| 1396133_at   | Integrin, beta 5                                                                                            | Igb5                 | 257645         | 9.10          | 4.59                    | 1.7E-01              | 1.0E-02              | 0.67                 | 0.00      | 0.80      | 0.00     |
| 1387314_at   | sulfotransferase family 1B, member 1                                                                        | Sult1b1              | 64305          | 2.22          | 4.48                    | 1.2E-01              | 2.3E-02              | 0.00                 | 0.00      | 0.80      | 0.00     |
| 1393252_at   | Transcribed locus                                                                                           |                      |                | 2.57          | 4.45                    | 2.6E-01              | 1.6E-02              | 1.00                 | 0.33      | 1.00      | 0.33     |
| 1384466_at   | notch1-induced protein                                                                                      | LOC493574            | 493574         | 5.53          | 4.36                    | 3.4E-01              | 1.4E-02              | 0.67                 | 0.00      | 0.80      | 0.11     |
| 1397730_at   | similar to RIKEN cDNA 231003C23 (predicted)                                                                 | RGD1307235_predicted | 309053         | 1.63          | 4.23                    | 7.2E-01              | 1.7E-02              | 1.00                 | 0.67      | 1.00      | 0.22     |
| 1367860_a_at | matrix metalloproteinase 14 (membrane-inserted)                                                             | Mmp14                | 81707          | 0.59          | 4.22                    | 6.4E-01              | 1.5E-02              | 0.00                 | 0.00      | 0.90      | 0.00     |
| 1388142_at   | chondroitin sulfate proteoglycan 2                                                                          | Cspg2                | 114122         | 1.86          | 4.18                    | 2.1E-01              | 3.4E-04              | 1.00                 | 1.00      | 1.00      | 1.00     |
| 1373025_at   | complement component 1, q subcomponent, gamma polypeptide                                                   | C1qg                 | 362634         | 0.46          | 4.07                    | 6.2E-01              | 1.9E-02              | 0.00                 | 0.00      | 0.80      | 0.00     |
| 1393682_at   | G-protein-coupled receptor GPR34 (predicted)                                                                | GPR34_predicted      | 554353         | 3.01          | 4.07                    | 1.0E-01              | 5.0E-04              | 0.67                 | 0.50      | 1.00      | 1.00     |
| 1369665_a_at | interleukin 18                                                                                              | Il18                 | 29197          | 2.77          | 4.04                    | 3.8E-02              | 3.4E-05              | 1.00                 | 1.00      | 1.00      | 1.00     |
| 1369290_at   | chemokine (C-C motif) receptor 5                                                                            | Ccr5                 | 117029         | 1.44          | 3.96                    | 6.1E-01              | 5.3E-03              | 1.00                 | 1.00      | 1.00      | 0.78     |
| 1388054_a_at | chondroitin sulfate proteoglycan 2                                                                          | Cspg2                | 114122         | 2.30          | 3.95                    | 2.2E-01              | 1.2E-03              | 1.00                 | 0.33      | 1.00      | 0.78     |
| 1370728_at   | interleukin 13 receptor, alpha 1                                                                            | Il13ra1              | 252963         | 2.62          | 3.92                    | 1.9E-01              | 4.1E-02              | 1.00                 | 0.67      | 1.00      | 0.33     |
| 1394630_at   | LIM domain only 4                                                                                           | Lmo4                 | 362051         | 1.27          | 3.90                    | 7.4E-01              | 8.1E-02              | 1.00                 | 0.00      | 0.50      | 0.00     |
| 1368494_at   | S100 calcium binding protein A8 (calgranulin A)                                                             | S100a8               | 116547         | 1.78          | 3.90                    | 2.1E-01              | 1.9E-02              | 1.00                 | 1.00      | 1.00      | 1.00     |
| 1371146_at   | transcription factor EC                                                                                     | Tec                  | 26296          | 1.72          | 3.73                    | 4.8E-01              | 7.5E-03              | 1.00                 | 0.33      | 1.00      | 0.22     |
| 1390364_at   | Transcribed locus                                                                                           |                      |                | 1.10          | 3.70                    | 9.1E-01              | 5.9E-04              | 1.00                 | 1.00      | 1.00      | 1.00     |
| 1383105_at   | hypothetical protein LOC681292                                                                              | LOC681292            | 681292         | 2.54          | 3.68                    | 7.4E-02              | 2.1E-04              | 1.00                 | 1.00      | 1.00      | 0.67     |
| 1378428_at   | Transcribed locus                                                                                           |                      |                | 1.62          | 3.66                    | 3.6E-01              | 9.2E-03              | 1.00                 | 1.00      | 1.00      | 1.00     |
| 1383743_at   | leucine rich repeat containing 16 (predicted)                                                               | Lrrc16_predicted     | 306941         | 6.08          | 3.58                    | 2.1E-01              | 2.0E-03              | 1.00                 | 0.33      | 1.00      | 0.22     |
| 1381613_at   | Similar to farnesyl diphosphate synthetase                                                                  | LOC501976            | 501976         | 2.27          | 3.51                    | 7.7E-02              | 4.0E-02              | 1.00                 | 0.00      | 1.00      | 0.00     |
| 1372031_at   | Transcribed locus                                                                                           |                      |                | 1.07          | 3.51                    | 8.4E-01              | 4.6E-04              | 0.00                 | 0.00      | 1.00      | 0.00     |
| 1371232_a_at | chondroitin sulfate proteoglycan 2                                                                          | Cspg2                | 114122         | 1.62          | 3.47                    | 1.2E-01              | 1.4E-03              | 1.00                 | 1.00      | 1.00      | 1.00     |
| 1391774_at   | Transcribed locus                                                                                           |                      |                | 2.89          | 3.41                    | 1.1E-01              | 1.5E-05              | 1.00                 | 1.00      | 1.00      | 1.00     |
| 1368597_at   | SNF1-like kinase                                                                                            | Snf1lk               | 59329          | 18.46         | 3.31                    | 1.6E-01              | 1.2E-03              | 1.00                 | 0.00      | 1.00      | 0.00     |
| 1394490_at   | ATP-binding cassette, sub-family A (ABC1), member 1                                                         | Abca1                | 313210         | 1.73          | 3.31                    | 1.8E-01              | 1.5E-04              | 1.00                 | 0.67      | 1.00      | 1.00     |
| 1368187_at   | glycoprotein (transmembrane) nmb                                                                            | Gpmb                 | 113955         | 2.04          | 3.30                    | 2.1E-01              | 2.6E-04              | 1.00                 | 1.00      | 1.00      | 1.00     |
| 1397222_at   | Tripartite motif protein 39                                                                                 | Trim39               | 309591         | 2.87          | 3.29                    | 1.3E-01              | 6.4E-02              | 1.00                 | 0.67      | 0.80      | 0.22     |
| 1377698_at   | tumor necrosis factor receptor superfamily, member 5                                                        | Tnfrsf5              | 171369         | 2.67          | 3.25                    | 3.9E-02              | 2.4E-04              | 1.00                 | 1.00      | 1.00      | 0.56     |
| 1394861_at   | POU domain, class 6, transcription factor 1                                                                 | Pou6f1               | 116545         | 3.61          | 3.23                    | 1.3E-01              | 4.0E-02              | 0.83                 | 0.33      | 1.00      | 0.00     |
| 1392043_at   | Insulin receptor                                                                                            | Insr                 | 24954          | 2.21          | 3.21                    | 4.0E-01              | 3.1E-03              | 1.00                 | 0.00      | 1.00      | 0.56     |
| 1375003_at   | serine (or cysteine) peptidase inhibitor, clade B, member 6a                                                | Serpinh6a            | 291085         | 2.94          | 3.20                    | 7.8E-02              | 1.4E-04              | 1.00                 | 1.00      | 1.00      | 1.00     |
| 1394451_at   | annexin A1                                                                                                  | Anxa1                | 25380          | 2.84          | 3.19                    | 3.6E-02              | 1.3E-05              | 1.00                 | 0.33      | 1.00      | 0.00     |
| 1385892_at   | Transcribed locus                                                                                           |                      |                | 1.00          | 3.14                    | 9.9E-01              | 7.5E-02              | 1.00                 | 0.83      | 0.90      | 0.17     |
| 1384479_at   | UDP-N-acetyl-alpha-D-galactosamine:polypeptide N-acetylgalactosaminyltransferase 3                          | Galnt3               | 366061         | 2.69          | 3.13                    | 1.5E-01              | 8.9E-02              | 1.00                 | 0.00      | 1.00      | 0.00     |
| 1382129_at   | Guanine nucleotide binding protein, alpha stimulating, olfactory type                                       | Gnal                 | 24611          | 2.24          | 3.11                    | 3.8E-01              | 5.1E-02              | 1.00                 | 0.67      | 1.00      | 0.61     |
| 1383506_at   | B-cell CLL/lymphoma 11A (zinc finger protein)                                                               | Bcl11a               | 305589         | 2.74          | 3.11                    | 9.8E-02              | 4.5E-02              | 1.00                 | 1.00      | 1.00      | 0.06     |
| 1370382_at   | RT1 class II, locus Bb                                                                                      | RT1-Bb               | 309622         | 1.99          | 3.08                    | 5.1E-01              | 8.2E-03              | 1.00                 | 0.67      | 1.00      | 1.00     |
| 1385759_at   | serine (or cysteine) peptidase inhibitor, clade B (ovalbumin), member 10                                    | Serpinh10            | 266775         | 2.39          | 3.08                    | 1.8E-01              | 4.9E-04              | 1.00                 | 1.00      | 1.00      | 1.00     |
| 1385871_at   | DEAH (Asp-Glu-Ala-His) box polypeptide 36 (predicted)                                                       | Dhx36_predicted      | 310461         | 1.48          | 3.07                    | 5.8E-01              | 7.1E-03              | 1.00                 | 1.00      | 1.00      | 1.00     |
| 1391219_at   | Transcribed locus                                                                                           |                      |                | 2.36          | 3.05                    | 3.0E-01              | 3.3E-05              | 1.00                 | 0.33      | 1.00      | 0.56     |
| 1390412_at   | Pre-B lymphocyte gene 3 (predicted)                                                                         | Vpreb3_predicted     | 365550         | 0.45          | 0.33                    | 2.2E-01              | 7.6E-05              | 1.00                 | 1.00      | 1.00      | 1.00     |
| 1387112_at   | proteolipid protein                                                                                         | Pip                  | 24943          | 0.57          | 0.33                    | 3.6E-01              | 9.0E-05              | 1.00                 | 1.00      | 1.00      | 1.00     |
| 1378738_at   | potassium voltage-gated channel, shaker-related subfamily, beta member 1                                    | Kcnab1               | 29737          | 0.41          | 0.33                    | 1.4E-01              | 3.0E-05              | 1.00                 | 1.00      | 1.00      | 1.00     |
| 1390807_at   | carbonic anhydrase VB, mitochondrial                                                                        | CaSb                 | 302669         | 0.34          | 0.33                    | 4.7E-02              | 1.2E-05              | 1.00                 | 1.00      | 1.00      | 1.00     |
| 1380831_at   | Transcribed locus                                                                                           |                      |                | 0.45          | 0.33                    | 1.4E-01              | 2.6E-05              | 1.00                 | 1.00      | 1.00      | 1.00     |
| 1369097_s_at | guanylate cyclase 1, soluble, beta 3                                                                        | Gucyl1b3             | 25202          | 0.57          | 0.32                    | 3.4E-01              | 3.3E-04              | 1.00                 | 1.00      | 1.00      | 1.00     |
| 1382853_at   | ring finger protein 11 (predicted)                                                                          | Rnf11_predicted      | 316552         | 0.53          | 0.32                    | 8.3E-02              | 5.6E-05              | 1.00                 | 1.00      | 1.00      | 1.00     |
| 1384045_at   |                                                                                                             |                      |                | 0.50          | 0.32                    | 2.2E-01              | 8.4E-02              | 0.33                 | 1.00      | 0.40      | 0.56     |
| 1395967_at   | Transcribed locus                                                                                           |                      |                | 0.70          | 0.32                    | 1.6E-01              | 8.4E-04              | 1.00                 | 1.00      | 0.00      | 0.94     |
| 1384273_at   | carbohydrate kinase-like                                                                                    | Carkl                | 287479         | 0.66          | 0.32                    | 5.2E-01              | 3.3E-04              | 1.00                 | 1.00      | 0.60      | 1.00     |
| 1371541_at   | myosin, light polypeptide kinase (predicted)                                                                | Mylk_predicted       | 288057         | 0.51          | 0.32                    | 1.7E-01              | 1.4E-04              | 1.00                 | 1.00      | 1.00      | 1.00     |
| 1386275_at   | Transcribed locus                                                                                           |                      |                | 0.39          | 0.32                    | 6.8E-02              | 8.8E-05              | 1.00                 | 1.00      | 1.00      | 1.00     |
| 1392817_at   | Transcribed locus                                                                                           |                      |                | 0.28          | 0.32                    | 5.1E-01              | 2.6E-02              | 0.00                 | 0.00      | 0.40      | 0.94     |
| 1370418_s_at | brain and kidney protein                                                                                    | Bk                   | 192189         | 0.39          | 0.32                    | 7.2E-02              | 1.6E-05              | 0.00                 | 0.00      | 0.00      | 1.00     |
| 1392801_at   | similar to novel protein (predicted)                                                                        | RGD1561145_predicted | 498580         | 0.37          | 0.32                    | 7.2E-02              | 1.1E-04              | 1.00                 | 1.00      | 1.00      | 1.00     |
| 1377309_at   | Transcribed locus                                                                                           |                      |                | 0.34          | 0.32                    | 1.9E-01              | 3.7E-05              | 1.00                 | 1.00      | 0.90      | 1.00     |
| 1376546_at   | similar to hypothetical protein (predicted)                                                                 | RGD1565432_predicted | 499157         | 0.72          | 0.32                    | 3.6E-01              | 1.7E-02              | 1.00                 | 0.80      | 1.00      | 1.00     |
| 1387130_at   | solute carrier family 39 (iron-regulated transporter), member 1                                             | Slc40a1              | 170840         | 0.51          | 0.32                    | 3.6E-01              | 7.1E-05              | 1.00                 | 1.00      | 1.00      | 1.00     |
| 1394386_s_at | vacuolar protein sorting 52 (yeast)                                                                         | Vps52                | 25218          | 0.52          | 0.32                    | 5.6E-02              | 1.5E-02              | 1.00                 | 1.00      | 0.00      | 0.67     |
| 1383240_at   | integrin, alpha 6                                                                                           | Iga6                 | 114517         | 0.44          | 0.32                    | 6.1E-02              | 1.2E-04              | 1.00                 | 1.00      | 1.00      | 1.00     |
| 1380600_at   | similar to Integrin alpha-IIb precursor (Platelet membrane glycoprotein IIb) (GPIIb) (GPIIb) (CD41 antigen) | LOC685269            | 685269         | 0.48          | 0.31                    | 2.0E-01              | 1.9E-04              | 1.00                 | 1.00      | 1.00      | 1.00     |
| 1368348_at   | solute carrier family 6 (neurotransmitter transporter, serotonin), member 4                                 | Slc6a4               | 25553          | 0.79          | 0.30                    | 6.3E-01              | 1.4E-04              | 1.00                 | 1.00      | 1.00      | 1.00     |
| 1388432_at   | optineurin                                                                                                  | Optn                 | 246294         | 0.44          | 0.30                    | 3.4E-02              | 3.8E-04              | 1.00                 | 1.00      | 1.00      | 1.00     |
| 1388804_at   | Transcribed locus                                                                                           |                      |                | 0.52          | 0.30                    | 2.0E-01              | 2.3E-02              | 1.00                 | 1.00      | 0.00      | 0.61     |
| 1369732_a_at | ST3 beta-galactoside alpha-2,3-sialyltransferase 2                                                          | St3gal2              | 64442          | 0.76          | 0.30                    | 5.2E-01              | 3.4E-05              | 1.00                 | 1.00      | 1.00      | 1.00     |

| Probe Set ID | Gene Title                                                                                  | Gene Symbol          | Entrez Gene ID | Fold Change   |                         | False Discovery Rate |                      | Average Present Call |           |           |          |
|--------------|---------------------------------------------------------------------------------------------|----------------------|----------------|---------------|-------------------------|----------------------|----------------------|----------------------|-----------|-----------|----------|
|              |                                                                                             |                      |                | Strain Effect | Strain+Rejection Effect | Native BN / DA       | Allograft / Isograft | Native BN            | Native DA | Allograft | Isograft |
| 1370548_at   | solute carrier family 16 (monocarboxylic acid transporters), member 10                      | Slc16a10             | 170566         | 0.55          | 0.30                    | 1.7E-01              | 7.8E-03              | 1.00                 | 1.00      | 0.40      | 1.00     |
| 1398420_at   | SMAD specific E3 ubiquitin protein ligase 2 (predicted)                                     | Smurf2_predicted     | 303614         | 0.54          | 0.30                    | 1.8E-01              | 1.1E-03              | 1.00                 | 1.00      | 1.00      | 1.00     |
| 1370518_a_at | syntaxin binding protein 1                                                                  | Sixbp1               | 25558          | 0.21          | 0.30                    | 1.2E-01              | 3.3E-05              | 0.00                 | 1.00      | 0.10      | 1.00     |
| 1374529_at   | Thrombospondin 1                                                                            | Tbhs1                | 445442         | 0.54          | 0.30                    | 1.4E-01              | 9.6E-06              | 1.00                 | 1.00      | 1.00      | 1.00     |
| 1377029_at   | RAR-related orphan receptor alpha (predicted)                                               | Rora_predicted       | 300807         | 1.03          | 0.30                    | 9.0E-01              | 8.5E-02              | 0.00                 | 0.17      | 0.00      | 0.56     |
| 1377646_at   | Transcribed locus                                                                           |                      |                | 0.70          | 0.29                    | 7.4E-01              | 3.7E-02              | 0.00                 | 0.00      | 0.10      | 0.67     |
| 1370913_at   | Best5 protein                                                                               | Best5                | 65190          | 0.39          | 0.29                    | 3.6E-01              | 1.7E-02              | 1.00                 | 1.00      | 1.00      | 1.00     |
| 1381780_at   | Transcribed locus                                                                           |                      |                | 1.09          | 0.29                    | 8.6E-01              | 2.1E-02              | 1.00                 | 1.00      | 1.00      | 1.00     |
| 1379325_at   | Fatty acid amide hydrolase                                                                  | Faah                 | 29347          | 0.52          | 0.29                    | 2.0E-01              | 5.6E-04              | 1.00                 | 1.00      | 1.00      | 1.00     |
| 1374139_at   | cerebellar degeneration-related 2                                                           | Cdr2                 | 308958         | 1.15          | 0.29                    | 6.5E-01              | 2.6E-02              | 1.00                 | 1.00      | 1.00      | 1.00     |
| 1379496_at   | RT1 class Ib, locus Aw2                                                                     | RT1-Aw2              | 24737          | 0.34          | 0.29                    | 3.3E-02              | 3.4E-04              | 1.00                 | 1.00      | 1.00      | 1.00     |
| 1394621_at   | Similar to genetic suppressor element 1 (predicted)                                         | RGD1562686_predicted | 307913         | 0.36          | 0.29                    | 3.6E-02              | 2.2E-06              | 1.00                 | 1.00      | 1.00      | 1.00     |
| 1370138_at   | lymphoid enhancer binding factor 1                                                          | Lef1                 | 161452         | 0.61          | 0.29                    | 3.6E-02              | 1.3E-04              | 1.00                 | 1.00      | 1.00      | 1.00     |
| 1370163_at   | ornithine decarboxylase 1                                                                   | Odc1                 | 24609          | 0.42          | 0.29                    | 7.7E-02              | 2.6E-06              | 1.00                 | 1.00      | 1.00      | 1.00     |
| 1383933_at   | Similar to KIAA0564 protein (predicted)                                                     | RGD1308772_predicted | 290381         | 0.60          | 0.29                    | 2.1E-01              | 8.8E-06              | 1.00                 | 1.00      | 1.00      | 1.00     |
| 1380100_at   | similar to Traf2 and NCK interacting kinase, splice variant 4 (predicted)                   | RGD1561817_predicted | 294917         | 0.46          | 0.28                    | 6.5E-02              | 8.9E-06              | 1.00                 | 1.00      | 0.10      | 1.00     |
| 1389654_at   | Plastin 1 (I isoform) (predicted)                                                           | Pls1_predicted       | 315926         | 0.53          | 0.28                    | 3.9E-01              | 1.2E-05              | 1.00                 | 1.00      | 0.20      | 1.00     |
| 1390579_at   | similar to RIKEN cDNA 1810029B16 (predicted)                                                | RGD1305222_predicted | 290686         | 0.58          | 0.28                    | 5.5E-02              | 8.1E-05              | 1.00                 | 1.00      | 0.60      | 1.00     |
| 1370152_at   | glycoprotein 5, platelet                                                                    | Gp5                  | 25259          | 0.80          | 0.28                    | 6.7E-01              | 3.2E-04              | 1.00                 | 1.00      | 1.00      | 1.00     |
| 1372455_at   | transmembrane 4 superfamily member 12                                                       | Tms4f12              | 362326         | 0.57          | 0.28                    | 3.1E-01              | 7.1E-05              | 1.00                 | 1.00      | 1.00      | 1.00     |
| 1368755_at   | C-type lectin domain family 4, member f                                                     | Clec4f               | 114598         | 0.37          | 0.28                    | 2.1E-01              | 4.9E-04              | 1.00                 | 1.00      | 0.50      | 1.00     |
| 1383399_at   | synaptic vesicle glycoprotein 2a                                                            | Sv2a                 | 117559         | 0.40          | 0.28                    | 4.8E-02              | 2.1E-06              | 1.00                 | 1.00      | 1.00      | 1.00     |
| 1373356_at   |                                                                                             |                      |                | 0.58          | 0.28                    | 2.0E-01              | 1.0E-03              | 1.00                 | 1.00      | 0.30      | 1.00     |
| 1370624_at   | coagulation factor II (thrombin) receptor-like 2                                            | F2r2                 | 29636          | 0.21          | 0.27                    | 1.2E-01              | 1.3E-05              | 1.00                 | 1.00      | 1.00      | 1.00     |
| 1387905_at   | J domain protein 1                                                                          | LOC619393            | 619393         | 0.41          | 0.27                    | 6.3E-02              | 5.5E-06              | 1.00                 | 1.00      | 1.00      | 1.00     |
| 1389398_at   | ankyrin 1, erythroid                                                                        | Ank1                 | 306570         | 1.13          | 0.27                    | 9.5E-01              | 6.8E-02              | 0.00                 | 0.00      | 0.00      | 0.67     |
| 1378843_at   | DnaJ (Hsp40) homolog, subfamily B, member 6                                                 | Dnajb6               | 362293         | 0.36          | 0.27                    | 1.9E-01              | 3.1E-03              | 1.00                 | 1.00      | 0.80      | 1.00     |
| 1388544_at   | 2,3-bisphosphoglycerate mutase                                                              | Bpgm                 | 296973         | 1.04          | 0.27                    | 8.8E-01              | 1.2E-02              | 1.00                 | 1.00      | 1.00      | 1.00     |
| 1390388_at   | ferrochelatase (predicted)                                                                  | Fchc_predicted       | 361338         | 1.06          | 0.27                    | 8.2E-01              | 3.1E-02              | 1.00                 | 1.00      | 1.00      | 1.00     |
| 1395222_at   | FCH domain only 2 (predicted)                                                               | Fcho2_predicted      | 309129         | 0.19          | 0.27                    | 2.8E-01              | 6.9E-05              | 0.00                 | 1.00      | 0.00      | 1.00     |
| 1398622_at   | cysteine-rich motor neuron 1 (predicted)                                                    | Crim1_predicted      | 298744         | 0.45          | 0.27                    | 1.5E-01              | 8.3E-05              | 1.00                 | 1.00      | 1.00      | 1.00     |
| 1386212_at   | spectrin alpha 1                                                                            | Spm1                 | 289257         | 1.20          | 0.26                    | 8.6E-01              | 6.1E-02              | 0.00                 | 0.00      | 0.40      | 0.89     |
| 1383551_at   | 2,3-bisphosphoglycerate mutase                                                              | Bpgm                 | 296973         | 1.00          | 0.26                    | 1.0E+00              | 5.4E-02              | 1.00                 | 1.00      | 0.80      | 1.00     |
| 1377423_at   | Transcribed locus                                                                           |                      |                | 1.37          | 0.26                    | 8.8E-01              | 1.6E-02              | 0.00                 | 0.00      | 0.00      | 0.61     |
| 1394109_at   | Thrombospondin 1                                                                            | Tbhs1                | 445442         | 0.68          | 0.26                    | 4.0E-01              | 2.3E-05              | 1.00                 | 1.00      | 1.00      | 1.00     |
| 1391448_at   | cysteine-rich motor neuron 1 (predicted)                                                    | Crim1_predicted      | 298744         | 0.44          | 0.26                    | 2.0E-01              | 6.9E-05              | 1.00                 | 1.00      | 1.00      | 1.00     |
| 1379203_at   | transcription factor Dp 2 (predicted)                                                       | Tcfdp2_predicted     | 300947         | 0.80          | 0.25                    | 5.2E-01              | 4.9E-02              | 1.00                 | 1.00      | 0.60      | 1.00     |
| 1370176_at   | trafficking protein, kinesin binding 2                                                      | Trak2                | 171086         | 0.45          | 0.25                    | 9.8E-02              | 1.4E-03              | 1.00                 | 1.00      | 0.90      | 1.00     |
| 1386463_at   | Transcribed locus                                                                           |                      |                | 0.15          | 0.25                    | 1.7E-01              | 7.4E-05              | 0.00                 | 1.00      | 0.20      | 1.00     |
| 1383853_at   | dual-specificity tyrosine-(Y)-phosphorylation regulated kinase 3                            | Dyrk3                | 304775         | 0.60          | 0.25                    | 7.6E-01              | 4.2E-02              | 0.00                 | 0.00      | 0.00      | 0.61     |
| 1392359_at   | Cytoskeleton associated protein 5                                                           | Ckap5                | 311191         | 0.29          | 0.25                    | 5.7E-01              | 2.2E-02              | 0.00                 | 0.00      | 0.00      | 0.89     |
| 1384805_at   | defensin beta 24                                                                            | Defb24               | 641632         | 0.24          | 0.24                    | 1.1E-01              | 8.6E-05              | 0.00                 | 0.33      | 0.00      | 0.50     |
| 1382106_at   | Chemokine (C-C motif) ligand 6                                                              | Ccl6                 | 287910         | 0.29          | 0.24                    | 2.2E-01              | 7.8E-05              | 0.17                 | 1.00      | 0.80      | 1.00     |
| 1377114_at   |                                                                                             |                      |                | 0.34          | 0.24                    | 2.7E-02              | 1.1E-07              | 1.00                 | 1.00      | 1.00      | 1.00     |
| 1368338_at   | CD52 antigen                                                                                | Cd52                 | 117054         | 0.71          | 0.24                    | 4.0E-01              | 7.2E-02              | 0.00                 | 0.00      | 0.40      | 0.94     |
| 1373093_at   | ERBB receptor feedback inhibitor 1                                                          | Errf1                | 313729         | 0.62          | 0.23                    | 1.3E-01              | 3.4E-02              | 1.00                 | 1.00      | 0.20      | 0.56     |
| 1387756_s_at | hemogen                                                                                     | Hemgn                | 113882         | 0.73          | 0.23                    | 4.9E-01              | 3.0E-02              | 1.00                 | 0.67      | 1.00      | 1.00     |
| 1390991_at   | hemoglobin, theta 1 (predicted)                                                             | Hbq1_predicted       | 303007         | 0.95          | 0.23                    | 9.6E-01              | 3.2E-02              | 0.33                 | 0.33      | 1.00      | 1.00     |
| 1368682_at   | synaptic vesicle glycoprotein 2a                                                            | Sv2a                 | 117559         | 0.47          | 0.23                    | 9.1E-02              | 8.7E-03              | 1.00                 | 1.00      | 0.20      | 0.94     |
| 1389353_at   | sema domain, transmembrane domain (TM), and cytoplasmic domain, (semaphorin) 6D (predicted) | Sema6d_predicted     | 311384         | 0.39          | 0.23                    | 1.2E-01              | 3.8E-04              | 1.00                 | 1.00      | 0.80      | 1.00     |
| 1386922_at   | carbonic anhydrase 2                                                                        | Ca2                  | 54231          | 0.72          | 0.23                    | 1.1E-01              | 1.1E-02              | 1.00                 | 1.00      | 1.00      | 1.00     |
| 1392405_at   | transcription factor Dp 2 (predicted)                                                       | Tcfdp2_predicted     | 300947         | 1.94          | 0.22                    | 9.5E-02              | 2.5E-02              | 1.00                 | 1.00      | 1.00      | 1.00     |
| 1367912_at   | latent transforming growth factor beta binding protein 1                                    | Ltbp1                | 59107          | 0.49          | 0.22                    | 1.9E-01              | 1.4E-05              | 1.00                 | 1.00      | 1.00      | 1.00     |
| 1387656_at   | solute carrier family 4, member 1                                                           | Slc4a1               | 24779          | 1.28          | 0.22                    | 8.5E-01              | 3.6E-02              | 0.67                 | 1.00      | 1.00      | 1.00     |
| 1378520_at   | B-cell leukemia/lymphoma 11B (predicted)                                                    | Bcl11b_predicted     | 314423         | 0.62          | 0.22                    | 2.3E-01              | 1.0E-02              | 1.00                 | 1.00      | 0.10      | 0.89     |
| 1382472_at   |                                                                                             |                      |                | 0.43          | 0.22                    | 9.2E-02              | 5.3E-05              | 1.00                 | 1.00      | 1.00      | 1.00     |
| 1374330_at   | similar to Kell protein (predicted)                                                         | RGD1565470_predicted | 297025         | 1.13          | 0.22                    | 7.3E-01              | 2.2E-02              | 0.00                 | 0.00      | 0.40      | 1.00     |
| 1389160_at   | erythroid associated factor (predicted)                                                     | Eraf_predicted       | 293522         | 3.65          | 0.21                    | 6.6E-01              | 5.2E-02              | 0.00                 | 0.00      | 1.00      | 1.00     |
| 1398577_at   | similar to RIKEN cDNA 1300017J02                                                            | RGD1310507           | 315963         | 0.39          | 0.20                    | 2.5E-01              | 8.1E-03              | 0.00                 | 0.00      | 0.30      | 1.00     |
| 1383557_at   | Transcribed locus                                                                           |                      |                | 0.38          | 0.20                    | 5.7E-02              | 1.9E-06              | 1.00                 | 1.00      | 1.00      | 1.00     |
| 1367673_at   | selenium binding protein 2                                                                  | Selenbp1             | 140927         | 1.24          | 0.20                    | 8.6E-01              | 7.6E-03              | 0.00                 | 0.00      | 0.60      | 1.00     |
| 1390800_a_at | caveolin 2                                                                                  | Cav2                 | 363425         | 0.08          | 0.19                    | 2.1E-01              | 7.6E-03              | 0.33                 | 1.00      | 0.40      | 1.00     |
| 1389783_s_at | similar to Fc fragment of IgG binding protein; IgG Fc binding protein                       | RGD1311906           | 292746         | 0.68          | 0.18                    | 6.0E-01              | 2.6E-02              | 0.67                 | 1.00      | 0.00      | 0.50     |
| 1368052_at   | hydroxysteroid 11-beta dehydrogenase 1                                                      | Hsd11b1 // Tspan8    | 171048         | 1.67          | 0.18                    | 7.1E-01              | 5.5E-02              | 0.00                 | 0.00      | 0.80      | 1.00     |
| 1391735_at   | Transcribed locus                                                                           |                      |                | 0.34          | 0.18                    | 6.4E-02              | 2.1E-05              | 1.00                 | 1.00      | 0.20      | 1.00     |
| 1369716_s_at | lectin, galactose binding, soluble 5                                                        | Lgals5 // Lgals9     | 25475          | 1.36          | 0.18                    | 1.9E-01              | 2.8E-03              | 1.00                 | 1.00      | 1.00      | 1.00     |
| 1368751_at   | potassium voltage-gated channel, delayed-rectifier, subfamily S, member 3                   | Kcns3                | 83588          | 0.37          | 0.17                    | 5.0E-02              | 1.4E-05              | 1.00                 | 1.00      | 1.00      | 1.00     |
| 1381160_at   | Transcribed locus                                                                           |                      |                | 0.16          | 0.15                    | 1.3E-01              | 2.2E-06              | 0.00                 | 1.00      | 0.00      | 1.00     |
| 1381487_at   | angiopoietin 1                                                                              | Angpt1               | 89807          | 0.50          | 0.14                    | 6.5E-01              | 1.1E-02              | 0.33                 | 0.67      | 0.00      | 0.50     |
| 1368753_at   | calcium/calmodulin-dependent protein kinase kinase 2, beta                                  | Camkk2               | 83506          | 0.59          | 0.14                    | 8.3E-01              | 1.1E-04              | 0.00                 | 0.33      | 0.00      | 1.00     |
| 1382618_at   | erythrocyte protein band 4.2 (predicted)                                                    | Epb4_2_predicted     | 362202         | 0.71          | 0.14                    | 7.7E-01              | 1.8E-02              | 0.00                 | 0.00      | 0.10      | 0.89     |
| 1372374_at   | carbonic anhydrase 1 (predicted)                                                            | Car1_predicted       | 310218         | 0.20          | 0.12                    | 3.4E-01              | 2.6E-02              | 0.00                 | 0.33      | 0.00      | 0.72     |
| 1395198_at   | Zinc finger protein 313                                                                     | Zfp313               | 362277         | 0.30          | 0.11                    | 3.1E-01              | 5.6E-05              | 0.00                 | 0.67      | 0.00      | 0.78     |
| 1392361_at   | Transcribed locus                                                                           |                      |                | 0.12          | 0.11                    | 1.4E-02              | 5.9E-04              | 0.00                 | 0.00      | 0.00      | 0.78     |
| 1374160_at   | similar to RIKEN cDNA 1110063G11 (predicted)                                                | RGD1311960_predicted | 305095         | 0.97          | 0.09                    | 9.6E-01              | 2.1E-04              | 0.83                 | 1.00      | 1.00      | 1.00     |
| 1380183_at   | pancreatic trypsin 1                                                                        | Pss1                 | 24691          | 0.91          | 0.08                    | 9.2E-01              | 3.5E-04              | 0.00                 | 0.00      | 0.00      | 0.78     |
| 1390216_a_at | Transcribed locus                                                                           |                      |                | 0.15          | 0.05                    | 8.4E-02              | 5.4E-05              | 0.00                 | 0.00      | 0.00      | 0.78     |

| Probe Set ID      | Gene Title                                                                                            | Gene Symbol          | Entrez Gene ID | Fold Change   |                         | False Discovery Rate |                      | Average Present Call |           |           |          |
|-------------------|-------------------------------------------------------------------------------------------------------|----------------------|----------------|---------------|-------------------------|----------------------|----------------------|----------------------|-----------|-----------|----------|
|                   |                                                                                                       |                      |                | Strain Effect | Strain+Rejection Effect | Native BN / DA       | Allograft / Isograft | Native BN            | Native DA | Allograft | Isograft |
| 1369142_at        | bone gamma-carboxylglutamate protein 2                                                                | Bglap2               | 25295          | 0.05          | 0.02                    | 1.3E-01              | 6.5E-09              | 0.00                 | 1.00      | 0.00      | 1.00     |
| <b>C. Overlap</b> |                                                                                                       |                      |                |               |                         |                      |                      |                      |           |           |          |
| 1370428_x_at      | RT1 class Ib, locus Aw2                                                                               | RT1-Aw2              | 24737          | 116.65        | 97.43                   | 1.4E-02              | 9.6E-08              | 1.00                 | 1.00      | 1.00      | 0.78     |
| 1381593_x_at      | RT1 class II, locus Ba                                                                                | RT1-Ba               | 309621         | 88.70         | 45.16                   | 2.5E-02              | 5.4E-07              | 1.00                 | 1.00      | 1.00      | 0.00     |
| 1374959_at        | NAD(P)H dehydrogenase, quinone 2                                                                      | Nqo2                 | 291084         | 21.08         | 53.10                   | 3.3E-02              | 9.1E-07              | 1.00                 | 0.00      | 1.00      | 0.00     |
| 1392334_at        | RT1 class II, locus Ba                                                                                | RT1-Ba               | 309621         | 51.80         | 27.39                   | 1.4E-02              | 6.5E-09              | 1.00                 | 0.00      | 1.00      | 0.00     |
| 1387992_at        | leukocyte immunoglobulin-like receptor, subfamily B (with TM and ITIM domains), member 3              | Lilrb3               | 361493         | 41.82         | 27.88                   | 2.5E-02              | 1.6E-04              | 1.00                 | 0.00      | 1.00      | 0.00     |
| 1374924_at        | UPF3 regulator of nonsense transcripts homolog B (yeast) (predicted)                                  | Ulp3b_predicted      | 313449         | 39.15         | 21.02                   | 8.9E-02              | 1.4E-04              | 1.00                 | 0.00      | 1.00      | 0.00     |
| 1392172_at        | chemokine (C-C motif) ligand 9                                                                        | Ccl9                 | 360579         | 19.87         | 6.65                    | 7.8E-02              | 6.0E-04              | 1.00                 | 0.00      | 1.00      | 0.00     |
| 1387839_at        | Cullin 2 (predicted)                                                                                  | Cul2_predicted       | 361258         | 18.16         | 9.63                    | 2.8E-02              | 2.7E-03              | 1.00                 | 0.00      | 0.80      | 0.00     |
| 1377655_at        | Similar to zinc finger protein 40                                                                     | LOC690661            | 690661         | 17.37         | 9.77                    | 2.7E-02              | 1.2E-03              | 1.00                 | 0.00      | 0.50      | 0.00     |
| 1370964_at        | argininosuccinate synthetase                                                                          | Ass                  | 25698          | 13.75         | 15.39                   | 3.2E-02              | 2.8E-05              | 1.00                 | 0.00      | 1.00      | 0.00     |
| 1367974_at        | annexin A3                                                                                            | Anxa3                | 25291          | 15.04         | 13.64                   | 1.5E-02              | 4.0E-07              | 1.00                 | 0.17      | 1.00      | 0.72     |
| 1395366_at        | Transcribed locus                                                                                     |                      | 12.55          | 7.53          | 9.0E-03                 | 1.4E-03              | 1.00                 | 0.33                 | 1.00      | 0.00      | 0.00     |
| 1380948_at        | Transcribed locus                                                                                     |                      | 12.51          | 9.15          | 2.3E-02                 | 5.2E-03              | 1.00                 | 1.00                 | 1.00      | 0.44      | 0.00     |
| 1394846_at        | similar to killer activatory receptor-like protein p91D (predicted)                                   | RGD1562625_predicted | 502291         | 4.63          | 12.02                   | 9.3E-02              | 3.7E-05              | 1.00                 | 0.00      | 0.80      | 0.00     |
| 1382257_at        | Uridine monophosphate synthetase                                                                      | Umps                 | 288051         | 11.60         | 7.34                    | 2.3E-02              | 1.9E-06              | 1.00                 | 1.00      | 1.00      | 0.94     |
| 1387799_at        | FXVD domain-containing ion transport regulator 2                                                      | Fxyd2                | 29639          | 8.85          | 9.88                    | 3.8E-02              | 9.3E-07              | 1.00                 | 1.00      | 1.00      | 1.00     |
| 1370493_a_at      | leukocyte immunoglobulin-like receptor, subfamily B (with TM and ITIM domains), member 3              | Lilrb3               | 361493         | 8.79          | 9.34                    | 6.8E-02              | 5.7E-05              | 1.00                 | 1.00      | 1.00      | 1.00     |
| 1374298_at        | Transcribed locus                                                                                     |                      | 9.21           | 7.27          | 3.2E-02                 | 5.9E-04              | 1.00                 | 0.00                 | 1.00      | 0.67      | 0.00     |
| 1383331_at        | Transcribed locus                                                                                     |                      | 9.10           | 4.68          | 3.0E-02                 | 2.4E-03              | 1.00                 | 0.33                 | 1.00      | 0.00      | 0.00     |
| 1370682_at        | leukocyte immunoglobulin-like receptor, subfamily B (with TM and ITIM domains), member 3              | Lilrb3               | 361493         | 9.02          | 8.52                    | 3.8E-03              | 1.1E-07              | 1.00                 | 1.00      | 1.00      | 1.00     |
| 1377539_at        | Immunoglobulin superfamily, member 4B (predicted)                                                     | Igsf4b_predicted     | 360882         | 8.14          | 4.53                    | 9.4E-02              | 1.6E-02              | 1.00                 | 0.00      | 1.00      | 0.06     |
| 1388102_at        | leukotriene B4 12-hydroxydehydrogenase                                                                | Ltd4dh               | 192227         | 3.80          | 8.07                    | 5.6E-02              | 2.0E-04              | 1.00                 | 0.00      | 1.00      | 0.00     |
| 1380346_at        | serine (or cysteine) proteinase inhibitor, clade B, member 1a                                         | Serpib1a             | 291091         | 3.19          | 7.81                    | 5.6E-02              | 1.9E-04              | 1.00                 | 1.00      | 1.00      | 1.00     |
| 1372293_at        | Transcribed locus                                                                                     |                      | 7.74           | 4.88          | 3.3E-02                 | 3.8E-05              | 1.00                 | 1.00                 | 1.00      | 1.00      | 0.00     |
| 1381336_at        | Transcribed locus                                                                                     |                      | 7.66           | 3.14          | 7.7E-02                 | 1.7E-03              | 1.00                 | 0.33                 | 1.00      | 0.61      | 0.00     |
| 1398358_a_at      | similar to integrin beta-5 (predicted)                                                                | RGD1563276_predicted | 498091         | 3.44          | 7.36                    | 7.2E-02              | 1.2E-03              | 1.00                 | 0.00      | 0.70      | 0.00     |
| 1385397_at        | Abi-219                                                                                               | LOC499991            | 499991         | 7.35          | 6.50                    | 2.6E-02              | 1.5E-03              | 1.00                 | 0.67      | 1.00      | 1.00     |
| 1372069_at        | ankyrin repeat domain 15                                                                              | Ankrd15              | 309429         | 7.19          | 3.53                    | 1.8E-02              | 6.1E-05              | 1.00                 | 0.50      | 1.00      | 0.89     |
| 1377851_at        | RT1 class Ib, locus Aw2                                                                               | RT1-Aw2              | 24737          | 3.51          | 6.84                    | 4.6E-02              | 1.6E-03              | 1.00                 | 0.00      | 1.00      | 0.00     |
| 1368700_at        | phospholipase C-like 1                                                                                | Pcl1                 | 84587          | 6.67          | 3.08                    | 9.8E-02              | 8.1E-02              | 1.00                 | 0.00      | 0.60      | 0.00     |
| 1385842_at        | interleukin 1 family, member 8 (predicted)                                                            | Il1l8_predicted      | 362076         | 6.13          | 5.63                    | 3.4E-02              | 7.4E-05              | 1.00                 | 0.33      | 1.00      | 1.00     |
| 1391399_at        | Transcribed locus                                                                                     |                      | 3.09           | 5.62          | 3.0E-02                 | 5.2E-05              | 1.00                 | 1.00                 | 1.00      | 1.00      | 0.00     |
| 1379223_x_at      | Transcribed locus                                                                                     |                      | 3.32           | 5.24          | 2.9E-02                 | 7.8E-06              | 1.00                 | 1.00                 | 1.00      | 1.00      | 0.00     |
| 1367627_at        | glycine amidinotransferase (L-arginine:glycine amidinotransferase)                                    | Gatm                 | 81660          | 3.65          | 5.23                    | 5.7E-02              | 6.7E-06              | 1.00                 | 1.00      | 1.00      | 1.00     |
| 1383561_at        | ligase IV, DNA, ATP-dependent (predicted)                                                             | Lig4_predicted       | 290907         | 5.19          | 4.32                    | 3.4E-02              | 7.6E-05              | 1.00                 | 1.00      | 1.00      | 1.00     |
| 1385047_x_at      | Complement component 6                                                                                | C6                   | 24237          | 5.02          | 3.92                    | 4.9E-02              | 3.0E-07              | 1.00                 | 1.00      | 1.00      | 1.00     |
| 1375080_at        | similar to mitochondrial hepatocellular carcinoma-downregulated carrier protein                       | LOC684556            | 684556         | 4.98          | 4.73                    | 3.2E-02              | 1.7E-05              | 1.00                 | 0.67      | 1.00      | 0.44     |
| 1380546_at        | similar to hypothetical protein FLJ10986                                                              | LOC298250            | 298250         | 3.05          | 4.86                    | 2.5E-02              | 1.0E-05              | 1.00                 | 0.50      | 1.00      | 0.06     |
| 1386938_at        | alanyl (membrane) aminopeptidase                                                                      | Anpep                | 81641          | 4.57          | 4.04                    | 3.1E-02              | 1.2E-05              | 1.00                 | 1.00      | 1.00      | 1.00     |
| 1383117_at        | peroxisomal membrane protein 4                                                                        | Pxmp4                | 282634         | 4.57          | 4.48                    | 2.6E-02              | 1.9E-06              | 1.00                 | 1.00      | 1.00      | 0.94     |
| 1393688_at        | Complement component 6                                                                                | C6                   | 24237          | 4.55          | 3.63                    | 5.8E-02              | 3.7E-06              | 1.00                 | 1.00      | 1.00      | 1.00     |
| 1382926_s_at      | Transcribed locus                                                                                     | Pum2                 | 298874         | 3.31          | 4.34                    | 8.3E-02              | 6.9E-05              | 1.00                 | 1.00      | 1.00      | 1.00     |
| 1386064_at        | Transcribed locus                                                                                     |                      | 4.34           | 3.12          | 3.3E-02                 | 1.3E-04              | 1.00                 | 1.00                 | 1.00      | 1.00      | 0.00     |
| 1379306_at        | Retinoblastoma-like 2                                                                                 | Rbl2                 | 81758          | 4.30          | 3.60                    | 3.9E-02              | 5.2E-05              | 1.00                 | 0.67      | 1.00      | 0.39     |
| 1377034_at        | serine (or cysteine) proteinase inhibitor, clade B, member 1a                                         | Serpib1a             | 291091         | 3.62          | 4.01                    | 5.1E-02              | 1.6E-04              | 1.00                 | 1.00      | 1.00      | 1.00     |
| 1367614_at        | annexin A1                                                                                            | Anxa1                | 25380          | 3.13          | 3.81                    | 6.7E-02              | 3.0E-05              | 1.00                 | 1.00      | 1.00      | 1.00     |
| 1378347_at        | Transcribed locus                                                                                     |                      | 3.77           | 3.45          | 9.4E-02                 | 2.7E-02              | 1.00                 | 0.33                 | 1.00      | 0.44      | 0.00     |
| 1387125_at        | S100 calcium binding protein A9 (calgranulin B)                                                       | S100a9               | 94195          | 0.32          | 3.55                    | 6.1E-02              | 7.1E-02              | 1.00                 | 1.00      | 1.00      | 1.00     |
| 1370904_at        | major histocompatibility complex, class II, DM alpha                                                  | Hla-dma              | 294274         | 3.20          | 3.46                    | 5.6E-02              | 3.5E-05              | 1.00                 | 1.00      | 1.00      | 1.00     |
| 1380768_at        | Transcribed locus                                                                                     |                      | 3.44           | 3.04          | 3.5E-02                 | 3.7E-05              | 1.00                 | 1.00                 | 1.00      | 1.00      | 0.00     |
| 1374626_at        | leucine-rich alpha-2-glycoprotein 1                                                                   | Lrg1                 | 367455         | 3.23          | 3.20                    | 6.7E-02              | 1.9E-03              | 1.00                 | 0.67      | 1.00      | 1.00     |
| 1373270_at        | WD repeat domain, phosphoinositide interacting 1 (predicted)                                          | Wipi1_predicted      | 303630         | 3.06          | 3.04                    | 7.8E-02              | 7.6E-05              | 1.00                 | 0.00      | 1.00      | 0.78     |
| 1392778_at        | Transcribed locus, weakly similar to XP_001056676.1 similar to Discs large homolog 5                  |                      | 3.06           | 3.01          | 2.7E-02                 | 6.5E-05              | 1.00                 | 1.00                 | 1.00      | 1.00      | 0.00     |
| 1385551_at        | Transcribed locus                                                                                     |                      | 0.33           | 0.25          | 4.1E-02                 | 8.7E-05              | 1.00                 | 1.00                 | 1.00      | 0.00      | 0.00     |
| 1381646_at        | ATPase, H transporting, lysosomal V1 subunit B2                                                       | Atp6v1b2             | 117596         | 0.21          | 0.33                    | 1.8E-02              | 1.5E-04              | 0.67                 | 1.00      | 1.00      | 1.00     |
| 1381893_at        | Transcribed locus, weakly similar to XP_573972.1 similar to RIKEN cDNA 843042hH19 [Rattus norvegicus] |                      | 0.28           | 0.33          | 6.0E-02                 | 2.4E-02              | 0.00                 | 0.00                 | 0.00      | 0.89      | 0.00     |
| 1392702_at        | Transcribed locus                                                                                     |                      | 0.25           | 0.33          | 3.3E-02                 | 4.0E-06              | 1.00                 | 1.00                 | 1.00      | 1.00      | 0.00     |
| 1380740_at        | Asparagine-linked glycosylation 12 homolog (yeast, alpha-1,6-mannosyltransferase) (predicted)         | Alg12_predicted      | 315212         | 0.25          | 0.33                    | 7.3E-02              | 1.1E-03              | 0.00                 | 1.00      | 0.20      | 1.00     |
| 1374280_at        | cerebellin 2 precursor protein                                                                        | Cbin2                | 291388         | 0.25          | 0.33                    | 5.0E-02              | 2.2E-04              | 1.00                 | 1.00      | 0.60      | 1.00     |
| 1384743_at        | Transcribed locus                                                                                     |                      | 0.32           | 0.17          | 7.0E-02                 | 3.7E-06              | 1.00                 | 1.00                 | 1.00      | 1.00      | 0.00     |
| 1375573_at        | Myeloid/lymphoid or mixed-lineage leukemia 5 (trithorax homolog, Drosophila)                          | Mll5                 | 311968         | 0.32          | 0.30                    | 7.7E-02              | 1.1E-04              | 1.00                 | 1.00      | 1.00      | 1.00     |
| 1395067_at        | Transcribed locus                                                                                     |                      | 0.29           | 0.32          | 4.3E-02                 | 1.6E-04              | 1.00                 | 1.00                 | 0.60      | 1.00      | 0.00     |
| 1374429_at        | Transcribed locus                                                                                     |                      | 0.18           | 0.32          | 9.8E-03                 | 1.1E-04              | 1.00                 | 1.00                 | 1.00      | 1.00      | 0.00     |
| 1370464_at        | ATP-binding cassette, sub-family B (MDR/TAP), member 1A                                               | Acbcb1a              | 170913         | 0.20          | 0.30                    | 5.0E-02              | 1.7E-04              | 0.33                 | 1.00      | 0.00      | 1.00     |
| 1380531_at        | Synaptobrevin-like 1                                                                                  | Sybl1                | 85491          | 0.24          | 0.30                    | 2.8E-02              | 8.0E-05              | 0.83                 | 1.00      | 0.40      | 1.00     |
| 1397589_at        | Transcribed locus                                                                                     |                      | 0.23           | 0.30          | 2.7E-02                 | 3.5E-04              | 1.00                 | 1.00                 | 1.00      | 1.00      | 0.00     |
| 1369926_at        | glutathione peroxidase 3                                                                              | Gpx3                 | 64317          | 0.19          | 0.30                    | 5.0E-02              | 1.2E-04              | 1.00                 | 1.00      | 0.60      | 1.00     |
| 1386679_at        | Transcribed locus                                                                                     |                      | 0.29           | 0.25          | 3.9E-02                 | 1.2E-05              | 1.00                 | 1.00                 | 1.00      | 1.00      | 0.00     |
| 1367857_at        | fatty acid desaturase 1                                                                               | Fads1                | 84575          | 0.29          | 0.18                    | 7.5E-02              | 1.3E-05              | 1.00                 | 1.00      | 1.00      | 1.00     |
| 1376071_at        | Transcribed locus                                                                                     |                      | 0.20           | 0.29          | 2.9E-02                 | 1.1E-04              | 1.00                 | 1.00                 | 1.00      | 1.00      | 0.00     |
| 1371171_at        | RT1 class Ib, locus Aw2                                                                               | RT1-Aw2              | 24737          | 0.14          | 0.29                    | 2.5E-02              | 1.4E-05              | 1.00                 | 1.00      | 1.00      | 1.00     |
| 1371078_at        | RT1 class Ib, locus Aw2                                                                               | RT1-Aw2              | 24737          | 0.28          | 0.24                    | 3.5E-02              | 1.2E-04              | 1.00                 | 1.00      | 0.60      | 1.00     |
| 1398330_at        | syntaxin binding protein 1                                                                            | Sixbp1               | 25558          | 0.28          | 0.27                    | 3.6E-02              | 5.5E-06              | 1.00                 | 1.00      | 1.00      | 1.00     |
| 1395436_at        | Protein phosphatase 3, catalytic subunit, alpha isoform                                               | Ppp3ca               | 24674          | 0.18          | 0.28                    | 3.9E-02              | 1.4E-04              | 0.00                 | 1.00      | 0.20      | 0.94     |

| Probe Set ID | Gene Title                                                                                            | Gene Symbol        | Entrez Gene ID | Fold Change   |                         | False Discovery Rate |                      | Average Present Call |           |           |          |
|--------------|-------------------------------------------------------------------------------------------------------|--------------------|----------------|---------------|-------------------------|----------------------|----------------------|----------------------|-----------|-----------|----------|
|              |                                                                                                       |                    |                | Strain Effect | Strain+Rejection Effect | Native BN / DA       | Allograft / Isograft | Native BN            | Native DA | Allograft | Isograft |
| 1379150_at   | Cytoplasmic FMR1 interacting protein 2 (predicted)                                                    | Cyfp2_predicted    | 303073         | 0.27          | 0.23                    | 3.6E-02              | 3.5E-04              | 1.00                 | 1.00      | 0.30      | 1.00     |
| 1394805_at   | Exportin 6                                                                                            | Xpo6               | 293476         | 0.22          | 0.27                    | 3.0E-02              | 3.5E-04              | 0.00                 | 1.00      | 0.00      | 0.61     |
| 1395166_at   | EH-domain containing 2                                                                                | Ehd2               | 361512         | 0.11          | 0.27                    | 6.3E-02              | 3.0E-04              | 0.17                 | 1.00      | 0.00      | 1.00     |
| 1385166_at   | Transcribed locus                                                                                     |                    |                | 0.26          | 0.25                    | 3.0E-02              | 5.4E-05              | 1.00                 | 1.00      | 0.30      | 1.00     |
| 1384165_at   | Coagulation factor II (thrombin) receptor-like 2                                                      | F2rl2              | 29636          | 0.26          | 0.21                    | 9.4E-02              | 1.4E-06              | 1.00                 | 1.00      | 1.00      | 1.00     |
| 1372923_at   | peroxisomal biogenesis factor 11b                                                                     | Pex11b             | 310682         | 0.22          | 0.26                    | 2.5E-02              | 1.7E-07              | 1.00                 | 1.00      | 1.00      | 1.00     |
| 1378887_at   | Transcribed locus                                                                                     |                    |                | 0.23          | 0.25                    | 9.7E-02              | 5.4E-05              | 0.33                 | 1.00      | 0.00      | 1.00     |
| 1374557_at   | CG6210-like                                                                                           | LOC362065          | 362065         | 0.25          | 0.24                    | 7.6E-02              | 2.3E-04              | 0.00                 | 1.00      | 0.00      | 0.56     |
| 1373267_at   | Sh3 domain YSC-like 1 (predicted)                                                                     | Sh3yl1_predicted   | 362724         | 0.12          | 0.24                    | 2.8E-02              | 1.3E-04              | 1.00                 | 1.00      | 1.00      | 1.00     |
| 1398598_at   | dystonia (predicted)                                                                                  | Dst_predicted      | 316313         | 0.24          | 0.23                    | 7.2E-02              | 7.8E-05              | 1.00                 | 1.00      | 1.00      | 1.00     |
| 1377479_at   | Transcribed locus                                                                                     |                    |                | 0.22          | 0.19                    | 2.8E-02              | 1.5E-04              | 1.00                 | 1.00      | 1.00      | 1.00     |
| 1369836_at   | interferon-induced protein with tetratricopeptide repeats 1                                           | Ifit1              | 56824          | 0.15          | 0.21                    | 3.5E-02              | 8.5E-04              | 0.00                 | 1.00      | 0.10      | 1.00     |
| 1392972_at   | triple functional domain (PTPRF interacting)                                                          | Trio               | 310192         | 0.11          | 0.21                    | 4.4E-03              | 8.7E-06              | 1.00                 | 1.00      | 0.80      | 1.00     |
| 1388276_at   | histone cluster 1, H4a (predicted)                                                                    | Hist1h4a_predicted | 364716         | 0.19          | 0.17                    | 3.3E-02              | 2.7E-05              | 1.00                 | 1.00      | 0.70      | 1.00     |
| 1383977_a_at |                                                                                                       |                    |                | 0.19          | 0.17                    | 9.8E-03              | 1.1E-03              | 0.00                 | 1.00      | 0.00      | 1.00     |
| 1373810_at   | phospholipase A2, group X11A (predicted)                                                              | Pla2g12a_predicted | 362039         | 0.19          | 0.11                    | 1.9E-02              | 1.9E-06              | 0.33                 | 1.00      | 0.00      | 1.00     |
| 1376193_at   | Kohjirin                                                                                              | Chrd1              | 363455         | 0.11          | 0.18                    | 3.0E-02              | 5.5E-06              | 1.00                 | 1.00      | 1.00      | 1.00     |
| 1381036_at   | Transcribed locus                                                                                     |                    |                | 0.14          | 0.18                    | 7.2E-03              | 5.2E-03              | 0.83                 | 1.00      | 0.00      | 1.00     |
| 1377334_at   | RT1 class II, locus Ba                                                                                | RT1-Ba             | 309621         | 0.05          | 0.18                    | 3.2E-02              | 1.6E-05              | 0.67                 | 1.00      | 0.60      | 1.00     |
| 1383272_at   | ankyrin repeat and SOCS box-containing protein 11 (predicted)                                         | Ash11_predicted    | 302666         | 0.16          | 0.08                    | 6.3E-02              | 8.3E-04              | 0.00                 | 1.00      | 0.00      | 0.78     |
| 1391791_at   | N-acylsphingosine amidohydrolase 3-like (predicted)                                                   | Asah3l_predicted   | 313339         | 0.06          | 0.16                    | 2.3E-02              | 1.1E-07              | 0.00                 | 1.00      | 0.10      | 1.00     |
| 1377642_at   | caveolin 2                                                                                            | Cav2               | 363425         | 0.06          | 0.13                    | 2.6E-02              | 2.1E-05              | 0.33                 | 1.00      | 0.80      | 1.00     |
| 1392860_at   |                                                                                                       |                    |                | 0.09          | 0.13                    | 4.3E-02              | 2.7E-07              | 0.33                 | 1.00      | 0.00      | 1.00     |
| 1368150_at   | solute carrier family 27 (fatty acid transporter), member 2                                           | Slc27a2            | 65192          | 0.11          | 0.13                    | 3.3E-02              | 6.6E-06              | 0.83                 | 1.00      | 0.80      | 1.00     |
| 1388955_at   | EH-domain containing 2                                                                                | Ehd2               | 361512         | 0.08          | 0.13                    | 3.2E-02              | 2.7E-06              | 0.83                 | 1.00      | 0.40      | 1.00     |
| 1373302_at   | Transcribed locus, strongly similar to XP_580072.1 hypothetical protein XP_580072 [Rattus norvegicus] |                    |                | 0.07          | 0.12                    | 3.4E-02              | 1.1E-07              | 0.33                 | 1.00      | 0.40      | 1.00     |
| 1384380_at   | Zinc finger, CCHC domain containing 7 (predicted)                                                     | Zcfc7_predicted    | 298086         | 0.10          | 0.08                    | 3.3E-02              | 7.2E-06              | 0.33                 | 1.00      | 0.00      | 1.00     |
| 1388176_at   | camello-like 5                                                                                        | Cml5               | 114020         | 0.10          | 0.07                    | 8.3E-02              | 1.8E-04              | 0.00                 | 1.00      | 0.00      | 1.00     |
| 1384191_at   | Cdc42 GTPase-activating protein (predicted)                                                           | Cdgap_predicted    | 288093         | 0.10          | 0.10                    | 2.6E-02              | 2.7E-07              | 0.67                 | 1.00      | 1.00      | 1.00     |
| 1372809_at   | hypothetical gene supported by AF152002                                                               | LOC290595          | 290595         | 0.05          | 0.10                    | 6.5E-02              | 4.6E-07              | 0.33                 | 1.00      | 0.80      | 1.00     |
| 1369202_at   | myxovirus (influenza virus) resistance 2                                                              | Mx2                | 286918         | 0.02          | 0.09                    | 2.5E-02              | 5.2E-06              | 0.33                 | 1.00      | 1.00      | 1.00     |
| 1387770_at   | putative ISG12(a) protein                                                                             | ig12(a)            | 360415         | 0.04          | 0.09                    | 3.8E-03              | 3.4E-07              | 1.00                 | 1.00      | 1.00      | 1.00     |
| 1396304_at   | RT1 class Ib, locus Aw2                                                                               | RT1-Aw2            | 24737          | 0.04          | 0.08                    | 4.0E-02              | 2.7E-07              | 1.00                 | 1.00      | 1.00      | 1.00     |
| 1387522_at   | Rhesus blood group-associated A glycoprotein                                                          | Rhag               | 65207          | 0.02          | 0.08                    | 7.9E-02              | 3.9E-04              | 0.00                 | 1.00      | 0.00      | 1.00     |
| 1392954_at   | RT1 class Ib, locus Aw2                                                                               | RT1-Aw2            | 24737          | 0.08          | 0.06                    | 3.1E-02              | 6.5E-05              | 0.00                 | 1.00      | 0.00      | 1.00     |
| 1394620_at   |                                                                                                       |                    |                | 0.08          | 0.06                    | 7.9E-02              | 3.5E-05              | 0.00                 | 1.00      | 0.00      | 0.78     |
| 1369110_x_at | RT1 class Ib, locus Aw2                                                                               | RT1-Aw2            | 24737          | 0.05          | 0.06                    | 9.0E-03              | 6.4E-08              | 1.00                 | 1.00      | 1.00      | 1.00     |
| 1374915_at   | GH regulated TBC protein 1                                                                            | Grtp1              | 361180         | 0.04          | 0.06                    | 1.8E-02              | 8.5E-08              | 0.00                 | 1.00      | 0.00      | 1.00     |
| 1382437_at   | RT1 class Ib, locus Aw2                                                                               | RT1-Aw2            | 24737          | 0.03          | 0.05                    | 6.3E-02              | 4.4E-05              | 0.00                 | 1.00      | 0.00      | 0.78     |
| 1370429_at   | RT1 class Ib, locus Aw2                                                                               | RT1-Aw2            | 24737          | 0.02          | 0.04                    | 4.4E-03              | 1.1E-07              | 0.33                 | 1.00      | 0.50      | 1.00     |
| 1379435_at   | deoxyguanosine kinase (predicted)                                                                     | Dguok_predicted    | 297389         | 0.03          | 0.04                    | 2.6E-02              | 4.0E-08              | 0.00                 | 1.00      | 0.00      | 0.89     |
| 1398692_at   | Transcribed locus                                                                                     |                    |                | 0.01          | 0.04                    | 3.8E-02              | 1.8E-07              | 0.00                 | 1.00      | 0.10      | 1.00     |
| 1398576_at   |                                                                                                       |                    |                | 0.03          | 0.01                    | 2.8E-02              | 6.5E-09              | 0.00                 | 1.00      | 0.00      | 1.00     |
| 1392714_at   | serine (or cysteine) peptidase inhibitor, clade B (ovalbumin), member 11 (predicted)                  | Serpib11_predicted | 304689         | 0.02          | 0.01                    | 1.8E-02              | 6.6E-06              | 0.00                 | 1.00      | 0.00      | 1.00     |
| 1397859_x_at | RT1 class I, A3                                                                                       | RT1-A3             | 309627         | 0.01          | 0.02                    | 4.4E-03              | 6.5E-09              | 1.00                 | 1.00      | 1.00      | 1.00     |
| 1393347_at   | integrin alpha L                                                                                      | Igal               | 308995         | 0.01          | 0.01                    | 3.8E-03              | 6.5E-09              | 0.83                 | 1.00      | 0.80      | 1.00     |
